# Supplementary material for: Computational investigation on the mechanism and the stereoselectivity of Morita–Baylis–Hillman reaction and the effect of the bifunctional catalyst N-methylprolinol
Source: Royal Society of Chemistry journal article supplement (doi:10.1039/c004932h), 2010-01-01
Supplement: c004932h.pdf [file c004932h.pdf]

## Electronic Supplementary Information

### Computational Investigation on the Mechanism and the Stereoselectivity of Morita–Baylis–Hillman Reaction and the Effect of the Bifunctional Catalyst N-methylprolinol

*Liang Dong, Song Qin, Zhishan Su, Huaqing Yang, Changwei Hu\**

Key Laboratory of Green Chemistry and Technology, Ministry of Education, College of Chemistry,  
Sichuan University, Chengdu, Sichuan, 610064, China.

AUTHOR EMAIL ADDRESS: [chwehu@mail.sc.cninfo.net](mailto:chwehu@mail.sc.cninfo.net), [gchem@scu.edu.cn](mailto:gchem@scu.edu.cn)

#### CONTENTS:

|                                                                          |     |
|--------------------------------------------------------------------------|-----|
| A. Computational methods.                                                | S2  |
| B. Energies and geometries.                                              | S3  |
| C. AIM analysis.                                                         | S62 |
| D. The geometry evolution and charge transfer in C–C bond formation.     | S63 |
| E. The energy profiles along different paths in the presence of water.   | S66 |
| F. The complete paths via <i>si-syn</i> -OH-TS2, <i>re-anti</i> -OH-TS3. | S67 |

## A. Computational methods.

The N-methylprolinol-catalyzed MBH reaction used in present simulation.

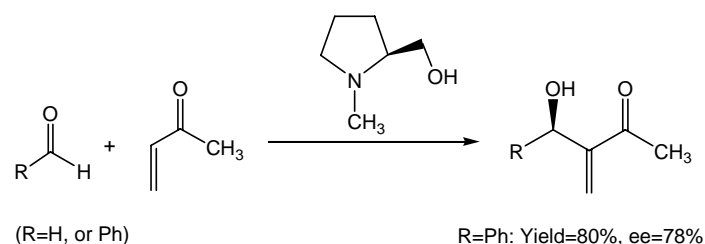

All the stationary points such as the transition states, reactants and products were optimized in the gas-phase at the 6-311++G(d,p) basis set. Zero-point vibrational energies (ZPVE) and basis-set superposition error (BSSE) corrections were also applied in relative energies. All the transition states were characterized by one and only one imaginary frequency pertaining to the desired reaction coordinate. Considering the effect of the solvent, single-point B3LYP (PCM)/6-311++G(d,p) calculations were performed in 1,4-dioxane and water, respectively. The energies of solvation were obtained from PCM total electronic energies including ZPVE.

## B. Energies and geometries

Table 1. The relative energies (in kJ/mol) for all the species along the MBH reaction between MVK and aldehyde catalyzed by N-methylprolinol.

(a) Imaginary frequencies at B3LYP/6-311++G(d,p) are shown.

(b) Single-point B3LYP (PCM, 1,4-dioxane)/[6-311++G(d,p)] calculations are shown.

(c) Single-point B3LYP (PCM, H<sub>2</sub>O)/[6-311++G(d,p)] calculations are shown.

| Species                              | E (Hartree) | E <sub>BSSE+ZPVE</sub> (Hartree) | E <sub>PCM</sub> <sup>(b)</sup> (Hartree) | E <sub>PCM</sub> <sup>(c)</sup> (Hartree) | <i>i</i> <sup>(a)</sup> (cm <sup>-1</sup> ) | ΔE    | ΔE <sub>PCM</sub> <sup>(b)</sup> | ΔE <sub>PCM</sub> <sup>(c)</sup> |
|--------------------------------------|-------------|----------------------------------|-------------------------------------------|-------------------------------------------|---------------------------------------------|-------|----------------------------------|----------------------------------|
| HCHO                                 | -114.515332 | -                                | -114.544076                               | -114.547156                               | -                                           | -     | -                                | -                                |
| PhCHO                                | -345.559831 | -                                | -345.672877                               | -345.678333                               | -                                           | -     | -                                | -                                |
| MVK                                  | -231.218370 | -                                | -231.310862                               | -231.315793                               | -                                           | -     | -                                | -                                |
| N-methylprolinol                     | -366.345918 | -                                | -366.540088                               | -366.547070                               | -                                           | -     | -                                | -                                |
| product                              | -345.752896 | -                                | -345.880930                               | -345.888815                               | -                                           | -50.4 | -49.0                            | -48.7                            |
| <i>syn</i> -IM1                      | -597.554000 | -597.553700                      | -597.840663                               | -597.852328                               | -                                           | 27.8  | 28.6                             | 29.3                             |
| <i>anti</i> -IM1                     | -597.553887 | -597.553677                      | -597.841098                               | -597.854009                               | -                                           | 27.9  | 26.2                             | 23.5                             |
| <i>syn</i> -TSa1                     | -712.018266 | -                                | -712.351563                               | -712.378958                               | -198                                        | 161.1 | 140.1                            | 107.5                            |
| <i>syn</i> -IMa2                     | -712.026167 | -                                | -712.362517                               | -712.394060                               | -                                           | 140.3 | 114.6                            | 71.2                             |
| <i>syn</i> -TSa2                     | -711.982828 | -                                | -712.316015                               | -712.346188                               | -1569                                       | 254.1 | 226.7                            | 186.9                            |
| <i>syn</i> -TSb1                     | -712.026075 | -                                | -712.356350                               | -712.379642                               | -111                                        | 140.6 | 126.6                            | 104.8                            |
| <i>syn</i> -IMb2                     | -712.042389 | -                                | -712.375055                               | -712.401804                               | -                                           | 97.7  | 82.2                             | 51.4                             |
| <i>syn</i> -TSb2                     | -711.989839 | -                                | -712.320249                               | -712.348151                               | -1562                                       | 235.7 | 216.6                            | 182.7                            |
| <i>anti</i> -TSc1                    | -712.021880 | -                                | -712.355914                               | -712.385500                               | -175                                        | 151.6 | 127.7                            | 89.4                             |
| <i>anti</i> -IMc2                    | -712.023144 | -                                | -712.357470                               | -712.385938                               | -                                           | 148.3 | 129.3                            | 93.9                             |
| <i>anti</i> -TSc2                    | -711.986765 | -                                | -712.317610                               | -712.345376                               | -1610                                       | 243.8 | 224.2                            | 190.6                            |
| <i>anti</i> -TSd1                    | -712.017653 | -                                | -712.350982                               | -712.37974                                | -135                                        | 162.7 | 140.3                            | 104.1                            |
| <i>anti</i> -IMd2                    | -712.021667 | -                                | -712.356062                               | -712.386273                               | -                                           | 152.2 | 132.8                            | 92.8                             |
| <i>anti</i> -TSd2                    | -711.979393 | -                                | -712.310485                               | -712.339072                               | -1576                                       | 263.1 | 242.2                            | 206.5                            |
| <i>syn</i> -a-H <sub>2</sub> O       | -788.483915 | -                                | -788.844753                               | -788.875489                               | -                                           | 86.5  | 74.6                             | 51.2                             |
| <i>syn</i> -TSa-H <sub>2</sub> O     | -788.474299 | -                                | -788.830805                               | -788.856164                               | -893                                        | 120.1 | 105.7                            | 96.4                             |
| <i>syn</i> -b-H <sub>2</sub> O       | -788.496285 | -                                | -788.855284                               | -788.882897                               | -                                           | 45.5  | 49.9                             | 34.8                             |
| <i>syn</i> -TSb-H <sub>2</sub> O     | -788.484681 | -                                | -788.837949                               | -788.858027                               | -1050                                       | 84.5  | 89.1                             | 93.7                             |
| <i>anti</i> -c-H <sub>2</sub> O      | -788.492202 | -                                | -788.851383                               | -788.878513                               | -                                           | 64.9  | 60.5                             | 46.6                             |
| <i>anti</i> -TSc-H <sub>2</sub> O    | -788.469236 | -                                | -788.824771                               | -788.847967                               | -1150                                       | 125.0 | 125.5                            | 121.9                            |
| <i>anti</i> -d-H <sub>2</sub> O      | -788.492182 | -                                | -788.849263                               | -788.873049                               | -                                           | 64.8  | 66.6                             | 61.5                             |
| <i>anti</i> -TSd-H <sub>2</sub> O    | -788.479057 | -                                | -788.833552                               | -788.855725                               | -1105                                       | 99.3  | 101.9                            | 101.0                            |
| <i>re-syn</i> -OH-TS1                | -943.059930 | -                                | -943.471709                               | -943.498040                               | -242                                        | 168.5 | 157.3                            | 133.8                            |
| <i>si-syn</i> -OH-TS2                | -943.065465 | -                                | -943.476726                               | -943.501280                               | -220                                        | 154.0 | 145.7                            | 126.8                            |
| <i>re-anti</i> -OH-TS3               | -943.063543 | -                                | -943.474656                               | -943.498349                               | -231                                        | 159.0 | 152.4                            | 135.8                            |
| <i>si-anti</i> -OH-TS4               | -943.063164 | -                                | -943.474463                               | -943.497715                               | -193                                        | 160.0 | 153.0                            | 137.6                            |
| <i>si-syn</i> -CH <sub>3</sub> -TS1  | -943.054652 | -                                | -943.467120                               | -943.494488                               | -155                                        | 182.4 | 170.9                            | 144.6                            |
| <i>re-syn</i> -CH <sub>3</sub> -TS2  | -943.056658 | -                                | -943.473080                               | -943.505107                               | -155                                        | 177.1 | 155.5                            | 117.0                            |
| <i>si-anti</i> -CH <sub>3</sub> -TS3 | -943.042906 | -                                | -943.457272                               | -943.487352                               | -220                                        | 213.2 | 196.8                            | 163.4                            |

|                                      |              |   |              |              |       |       |       |       |
|--------------------------------------|--------------|---|--------------|--------------|-------|-------|-------|-------|
| <i>re-anti</i> -CH <sub>3</sub> -TS4 | -943.051831  | - | -943.465990  | -943.497296  | -153  | 189.8 | 172.4 | 135.8 |
| IM-OH-TS2                            | -943.071095  | - | -943.483904  | -943.511003  | -     | 139.2 | 129.0 | 103.5 |
| TS2-OH-TS2                           | -943.022870  | - | -943.431093  | -943.457248  | -1599 | 265.8 | 256.8 | 233.7 |
| pro-OH-TS2                           | -576.779367  | - | -576.988319  | -576.998673  | -     | -3.1  | 1.3   | 1.4   |
| com-H <sub>2</sub> O-OH-TS2          | -1019.508920 | - | -1019.94983  | -1019.983509 | -     | 137.7 | 131.5 | 106.6 |
| TS-H <sub>2</sub> O-OH-TS2           | -1019.502771 | - | -1019.93576  | -1019.958423 | -886  | 153.8 | 164.5 | 168.6 |
| IM-OH-TS3                            | -943.065517  | - | -943.478968  | -943.507280  | -     | 153.9 | 142.0 | 113.3 |
| TS2-OH-TS3                           | -943.021617  | - | -943.430579  | -943.457481  | -1624 | 269.1 | 259.5 | 234.5 |
| pro-OH-TS3                           | -576.779367  | - | -576.988304  | -576.998813  | -     | -3.1  | 1.3   | 1.0   |
| com-H <sub>2</sub> O-OH-TS3          | -1019.512491 | - | -1019.951899 | -1019.981151 | -     | 128.3 | 128.6 | 115.4 |
| TS-H <sub>2</sub> O-OH-TS3           | -1019.496944 | - | -1019.931708 | -1019.957483 | -719  | 169.1 | 174.0 | 169.9 |

#### HCHO:

Zero-point Energy: B3LYP/6-311++G(d,p) = -114.515332 (a.u.) Zero-point Correction = 0.026517 (a.u.)

SCF Energy: B3LYP (PCM, 1,4-dioxane)/6-311++G(d,p) = -114.544076 (a.u.)

B3LYP (PCM, H<sub>2</sub>O)/6-311++G(d,p) = -114.547156 (a.u.)

#### PhCHO:

Zero-point Energy: B3LYP/6-311++G(d,p) = -345.559831 (a.u.) Zero-point Correction = 0.109356 (a.u.)

SCF Energy: B3LYP (PCM, 1,4-dioxane)/6-311++G(d,p) = -345.672877 (a.u.)

B3LYP (PCM, H<sub>2</sub>O)/6-311++G(d,p) = -345.678333 (a.u.)

#### MVK:

Standard orientation:

| Center<br>Number | Atomic<br>Number | Atomic<br>Type | Coordinates (Angstroms) |           |           |
|------------------|------------------|----------------|-------------------------|-----------|-----------|
|                  |                  |                | X                       | Y         | Z         |
| 1                | 6                | 0              | 0.885999                | -0.620944 | 0.000000  |
| 2                | 6                | 0              | 0.471463                | -1.889496 | 0.000000  |
| 3                | 6                | 0              | 0.000000                | 0.575703  | 0.000000  |
| 4                | 1                | 0              | 1.944808                | -0.379765 | 0.000000  |
| 5                | 6                | 0              | -1.505615               | 0.389437  | 0.000000  |
| 6                | 8                | 0              | 0.498048                | 1.686606  | 0.000000  |
| 7                | 1                | 0              | -0.579602               | -2.156270 | 0.000000  |
| 8                | 1                | 0              | 1.177851                | -2.711930 | 0.000000  |
| 9                | 1                | 0              | -1.981555               | 1.368629  | 0.000000  |
| 10               | 1                | 0              | -1.828485               | -0.170856 | 0.882213  |
| 11               | 1                | 0              | -1.828485               | -0.170856 | -0.882213 |

Zero-point Energy: B3LYP/6-311++G(d,p) = -231.218370 (a.u.) Zero-point Correction = 0.089024 (a.u.)

SCF Energy: B3LYP (PCM, 1,4-dioxane)/6-311++G(d,p) = -231.310862 (a.u.)

B3LYP (PCM, H<sub>2</sub>O)/6-311++G(d,p) = -231.315793 (a.u.)

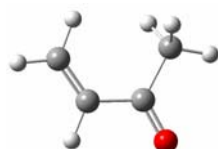

**N-methylprolinol:**

Standard orientation:

| Center Number | Atomic Number | Atomic Type | Coordinates (Angstroms) |           |           |
|---------------|---------------|-------------|-------------------------|-----------|-----------|
|               |               |             | X                       | Y         | Z         |
| 1             | 7             | 0           | -0.436402               | 0.744224  | -0.200135 |
| 2             | 6             | 0           | -1.746288               | 0.104013  | -0.333798 |
| 3             | 6             | 0           | -1.406119               | -1.384722 | -0.368669 |
| 4             | 6             | 0           | -0.233118               | -1.501799 | 0.629705  |
| 5             | 6             | 0           | 0.357182                | -0.069557 | 0.745688  |
| 6             | 6             | 0           | -0.497314               | 2.162859  | 0.114674  |
| 7             | 6             | 0           | 1.842773                | 0.022328  | 0.381648  |
| 8             | 8             | 0           | 2.065797                | -0.333872 | -0.974025 |
| 9             | 1             | 0           | -2.255891               | 0.458921  | -1.234060 |
| 10            | 1             | 0           | -2.395588               | 0.334324  | 0.532159  |
| 11            | 1             | 0           | -1.081174               | -1.665665 | -1.373379 |
| 12            | 1             | 0           | -2.256712               | -2.015116 | -0.102234 |
| 13            | 1             | 0           | 0.518809                | -2.212971 | 0.285152  |
| 14            | 1             | 0           | -0.584834               | -1.838214 | 1.607695  |
| 15            | 1             | 0           | 0.232132                | 0.304602  | 1.776969  |
| 16            | 1             | 0           | -0.993622               | 2.358763  | 1.082494  |
| 17            | 1             | 0           | 0.507399                | 2.588957  | 0.155728  |
| 18            | 1             | 0           | -1.050141               | 2.691311  | -0.665921 |
| 19            | 1             | 0           | 2.215932                | 1.037674  | 0.580151  |
| 20            | 1             | 0           | 2.423824                | -0.666654 | 1.000206  |
| 21            | 1             | 0           | 1.345608                | 0.086743  | -1.467300 |

Zero-point Energy: B3LYP/6-311++G(d,p) = -366.345918 (a.u.) Zero-point Correction = 0.189978 (a.u.)

SCF Energy: B3LYP (PCM, 1,4-dioxane)/6-311++G(d,p) = -366.540088 (a.u.)

B3LYP (PCM, H<sub>2</sub>O)/6-311++G(d,p) = -366.547070 (a.u.)

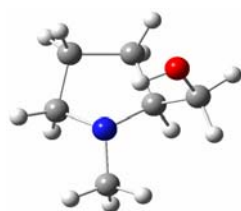

**product:**

Standard orientation:

| Center<br>Number | Atomic<br>Number | Atomic<br>Type | Coordinates (Angstroms) |           |           |
|------------------|------------------|----------------|-------------------------|-----------|-----------|
|                  |                  |                | X                       | Y         | Z         |
| 1                | 6                | 0              | 0.211982                | 1.942947  | -0.095343 |
| 2                | 6                | 0              | -0.144435               | 0.670890  | 0.113222  |
| 3                | 1                | 0              | 1.235829                | 2.237964  | -0.291772 |
| 4                | 1                | 0              | -0.523453               | 2.740364  | -0.076026 |
| 5                | 6                | 0              | 0.847192                | -0.450810 | 0.075559  |
| 6                | 8                | 0              | 0.455599                | -1.599051 | 0.221162  |
| 7                | 6                | 0              | 2.318098                | -0.163871 | -0.145535 |
| 8                | 1                | 0              | 2.864457                | -1.105150 | -0.116948 |
| 9                | 1                | 0              | 2.708548                | 0.507858  | 0.623555  |
| 10               | 1                | 0              | 2.477008                | 0.315477  | -1.115585 |
| 11               | 1                | 0              | -1.604696               | -1.449782 | -0.461905 |
| 12               | 6                | 0              | -1.574872               | 0.270499  | 0.414740  |
| 13               | 8                | 0              | -2.114444               | -0.633025 | -0.541183 |
| 14               | 1                | 0              | -1.621665               | -0.163474 | 1.422584  |
| 15               | 1                | 0              | -2.213052               | 1.155428  | 0.400407  |

Zero-point Energy: B3LYP/6-311++G(d,p) = -345.752896 (a.u.) Zero-point Correction = 0.122856 (a.u.)

SCF Energy: B3LYP (PCM, 1,4-dioxane)/6-311++G(d,p) = -345.880930 (a.u.)

B3LYP (PCM, H<sub>2</sub>O)/6-311++G(d,p) = -345.888815 (a.u.)

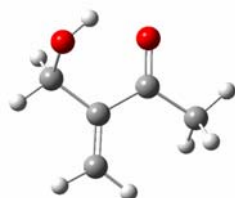

***syn-IM1***:

Standard orientation:

| Center<br>Number | Atomic<br>Number | Atomic<br>Type | Coordinates (Angstroms) |           |           |
|------------------|------------------|----------------|-------------------------|-----------|-----------|
|                  |                  |                | X                       | Y         | Z         |
| 1                | 1                | 0              | -1.528337               | -2.272066 | 1.149646  |
| 2                | 6                | 0              | -3.251796               | -1.949592 | -0.229327 |
| 3                | 6                | 0              | -1.795495               | -1.699750 | 0.259940  |
| 4                | 6                | 0              | -3.709021               | -0.569091 | -0.770313 |
| 5                | 1                | 0              | -3.892007               | -2.282742 | 0.590563  |
| 6                | 1                | 0              | -3.287148               | -2.728009 | -0.994484 |
| 7                | 6                | 0              | -2.449740               | 0.322877  | -0.614708 |
| 8                | 7                | 0              | -1.677758               | -0.252460 | 0.516316  |

|    |   |   |           |           |           |
|----|---|---|-----------|-----------|-----------|
| 9  | 1 | 0 | -1.088921 | -1.964474 | -0.533246 |
| 10 | 1 | 0 | -4.539528 | -0.172863 | -0.178853 |
| 11 | 1 | 0 | -4.042985 | -0.612176 | -1.808838 |
| 12 | 6 | 0 | -2.716390 | 1.814025  | -0.491130 |
| 13 | 6 | 0 | -2.175589 | 0.102061  | 1.852666  |
| 14 | 8 | 0 | -1.512200 | 2.575138  | -0.441090 |
| 15 | 1 | 0 | -3.265378 | 2.157425  | -1.371085 |
| 16 | 1 | 0 | -3.341423 | 2.020770  | 0.388146  |
| 17 | 1 | 0 | -1.579179 | -0.433361 | 2.593881  |
| 18 | 1 | 0 | -2.044385 | 1.169448  | 2.039800  |
| 19 | 1 | 0 | -0.891887 | 2.084776  | 0.110480  |
| 20 | 1 | 0 | -3.235320 | -0.143978 | 2.025636  |
| 21 | 1 | 0 | -1.816418 | 0.180550  | -1.499359 |
| 22 | 6 | 0 | 3.168862  | 0.426525  | 0.177513  |
| 23 | 6 | 0 | 4.610888  | 0.092458  | 0.025301  |
| 24 | 8 | 0 | 5.453129  | 0.881324  | 0.414892  |
| 25 | 6 | 0 | 5.008015  | -1.227338 | -0.610538 |
| 26 | 1 | 0 | 4.609424  | -2.068481 | -0.036087 |
| 27 | 1 | 0 | 6.094660  | -1.290240 | -0.637236 |
| 28 | 1 | 0 | 4.611901  | -1.305207 | -1.626982 |
| 29 | 6 | 0 | 2.149901  | -0.353935 | -0.190867 |
| 30 | 1 | 0 | 2.307737  | -1.328922 | -0.639711 |
| 31 | 1 | 0 | 1.118697  | -0.043066 | -0.055410 |
| 32 | 1 | 0 | 2.989558  | 1.398699  | 0.627293  |

Zero-point Energy: B3LYP/6-311++G(d,p) = -597.554000 (a.u.) Zero-point Correction = 0.279614 (a.u.)

BSSE Correction = -597.833314 (a.u.)

SCF Energy: B3LYP (PCM, 1,4-dioxane)/6-311++G(d,p) = -597.840663 (a.u.)

B3LYP (PCM, H<sub>2</sub>O)/6-311++G(d,p) = -597.852328 (a.u.)

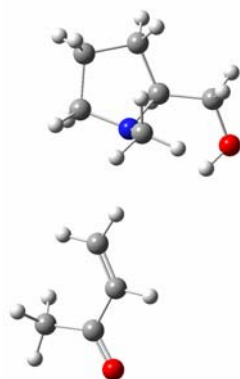

**anti-IM1:**

Standard orientation:

Center Atomic Atomic Coordinates (Angstroms)

| Number | Number | Type | X         | Y         | Z         |
|--------|--------|------|-----------|-----------|-----------|
| 1      | 1      | 0    | 2.017313  | -0.720775 | -1.947239 |
| 2      | 6      | 0    | 2.390902  | -1.265216 | -1.075030 |
| 3      | 6      | 0    | 3.888358  | -0.940262 | -0.838395 |
| 4      | 7      | 0    | 1.658398  | -0.809766 | 0.122600  |
| 5      | 1      | 0    | 2.199397  | -2.324935 | -1.254145 |
| 6      | 6      | 0    | 3.870067  | 0.210016  | 0.202255  |
| 7      | 1      | 0    | 4.386781  | -0.654701 | -1.767029 |
| 8      | 1      | 0    | 4.418859  | -1.810786 | -0.445759 |
| 9      | 6      | 0    | 2.366623  | 0.416972  | 0.544838  |
| 10     | 6      | 0    | -2.541508 | -1.087515 | -0.074742 |
| 11     | 6      | 0    | 1.621455  | -1.826360 | 1.176419  |
| 12     | 1      | 0    | 4.307113  | 1.134657  | -0.178429 |
| 13     | 1      | 0    | 4.435273  | -0.064853 | 1.095233  |
| 14     | 6      | 0    | 1.760109  | 1.633654  | -0.170018 |
| 15     | 1      | 0    | 2.217046  | 0.557423  | 1.621020  |
| 16     | 6      | 0    | -3.873938 | -1.097656 | 0.006834  |
| 17     | 1      | 0    | -1.967201 | -0.178402 | -0.209919 |
| 18     | 1      | 0    | -1.967900 | -2.005148 | -0.011308 |
| 19     | 1      | 0    | 2.617353  | -2.140142 | 1.533473  |
| 20     | 1      | 0    | 1.062179  | -1.444274 | 2.033479  |
| 21     | 1      | 0    | 1.102423  | -2.714290 | 0.808318  |
| 22     | 8      | 0    | 2.402559  | 2.859098  | 0.182839  |
| 23     | 1      | 0    | 1.883298  | 1.546066  | -1.251764 |
| 24     | 1      | 0    | 0.685319  | 1.676622  | 0.040908  |
| 25     | 6      | 0    | -4.752036 | 0.101980  | -0.059734 |
| 26     | 8      | 0    | -5.957226 | -0.032555 | 0.055524  |
| 27     | 6      | 0    | -4.133009 | 1.474238  | -0.250419 |
| 28     | 1      | 0    | -3.397764 | 1.481989  | -1.058136 |
| 29     | 1      | 0    | -3.621016 | 1.779911  | 0.667847  |
| 30     | 1      | 0    | -4.924977 | 2.190525  | -0.463629 |
| 31     | 1      | 0    | -4.418069 | -2.027605 | 0.144179  |
| 32     | 1      | 0    | 2.210984  | 3.055633  | 1.105743  |

Zero-point Energy: B3LYP/6-311++G(d,p) = -597.553887 (a.u.) Zero-point Correction = 0.279112 (a.u.)  
BSSE Correction = -597.832789 (a.u.)

SCF Energy: B3LYP (PCM, 1,4-dioxane)/6-311++G(d,p) = -597.841098 (a.u.)

B3LYP (PCM, H<sub>2</sub>O)/6-311++G(d,p) = -597.854009 (a.u.)



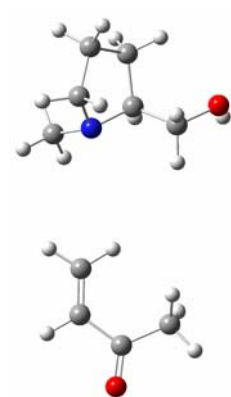

**syn-TSa1:**

Standard orientation:

| Center<br>Number | Atomic<br>Number | Atomic<br>Type | Coordinates (Angstroms) |           |           |
|------------------|------------------|----------------|-------------------------|-----------|-----------|
|                  |                  |                | X                       | Y         | Z         |
| 1                | 6                | 0              | 2.242769                | 1.603552  | -0.587117 |
| 2                | 8                | 0              | 1.354944                | 2.350951  | -1.098447 |
| 3                | 1                | 0              | 3.111467                | 1.289421  | -1.182452 |
| 4                | 1                | 0              | 0.023053                | 2.077780  | 0.314080  |
| 5                | 6                | 0              | -2.110325               | 1.962683  | 0.938939  |
| 6                | 6                | 0              | -0.695175               | 1.410556  | 0.801481  |
| 7                | 6                | 0              | -3.033066               | 0.722622  | 0.876524  |
| 8                | 1                | 0              | -2.333642               | 2.659323  | 0.128892  |
| 9                | 1                | 0              | -2.218293               | 2.515764  | 1.872633  |
| 10               | 6                | 0              | -2.130311               | -0.467120 | 0.481888  |
| 11               | 7                | 0              | -0.838132               | 0.166045  | -0.060979 |
| 12               | 1                | 0              | -0.308579               | 1.069827  | 1.763499  |
| 13               | 1                | 0              | -3.834855               | 0.862354  | 0.146669  |
| 14               | 1                | 0              | -3.510758               | 0.515855  | 1.835518  |
| 15               | 6                | 0              | -2.854429               | -1.438612 | -0.438141 |
| 16               | 6                | 0              | -0.955061               | 0.545039  | -1.511406 |
| 17               | 8                | 0              | -2.053598               | -2.587815 | -0.681114 |
| 18               | 1                | 0              | -3.782944               | -1.712141 | 0.079960  |
| 19               | 1                | 0              | -3.134023               | -0.942367 | -1.374731 |
| 20               | 1                | 0              | -0.103014               | 1.185976  | -1.753088 |
| 21               | 1                | 0              | -0.952194               | -0.365020 | -2.108173 |
| 22               | 1                | 0              | -2.544220               | -3.210860 | -1.226595 |
| 23               | 1                | 0              | -1.885178               | 1.091295  | -1.667706 |
| 24               | 1                | 0              | -1.807930               | -1.011749 | 1.371743  |
| 25               | 6                | 0              | 1.689593                | -0.385232 | -0.457183 |
| 26               | 6                | 0              | 2.890013                | -0.846382 | 0.224460  |
| 27               | 8                | 0              | 3.957412                | -0.987453 | -0.374188 |

|    |   |   |          |           |           |
|----|---|---|----------|-----------|-----------|
| 28 | 6 | 0 | 2.876888 | -1.055656 | 1.742831  |
| 29 | 1 | 0 | 2.313823 | -0.283227 | 2.275407  |
| 30 | 1 | 0 | 3.907981 | -1.053018 | 2.095083  |
| 31 | 1 | 0 | 2.434768 | -2.027071 | 1.993148  |
| 32 | 6 | 0 | 0.369236 | -0.803785 | 0.131660  |
| 33 | 1 | 0 | 0.423207 | -0.935997 | 1.212413  |
| 34 | 1 | 0 | 0.001614 | -1.735083 | -0.300907 |
| 35 | 1 | 0 | 1.754303 | -0.585294 | -1.524690 |
| 36 | 1 | 0 | 2.501479 | 1.740452  | 0.482527  |

Zero-point Energy: B3LYP/6-311++G(d,p) = -712.018266 (a.u.) Zero-point Correction = 0.315419 (a.u.)

SCF Energy: B3LYP (PCM, 1,4-dioxane)/6-311++G(d,p) = -712.351563 (a.u.)

B3LYP (PCM, H<sub>2</sub>O)/6-311++G(d,p) = -712.378958 (a.u.)

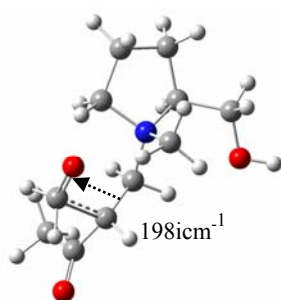

**syn-IMa2:**

Standard orientation:

| Center Number | Atomic Number | Atomic Type | Coordinates (Angstroms) |           |           |
|---------------|---------------|-------------|-------------------------|-----------|-----------|
|               |               |             | X                       | Y         | Z         |
| 1             | 6             | 0           | -1.952948               | -1.655867 | -0.294419 |
| 2             | 8             | 0           | -1.084112               | -2.352245 | -1.049738 |
| 3             | 1             | 0           | -3.019578               | -1.807988 | -0.578230 |
| 4             | 1             | 0           | 0.373418                | -2.256917 | 0.097523  |
| 5             | 6             | 0           | 2.541671                | -1.821401 | 0.588792  |
| 6             | 6             | 0           | 1.041990                | -1.556757 | 0.635053  |
| 7             | 6             | 0           | 3.200072                | -0.419987 | 0.646966  |
| 8             | 1             | 0           | 2.818698                | -2.347828 | -0.326459 |
| 9             | 1             | 0           | 2.842583                | -2.455529 | 1.423471  |
| 10            | 6             | 0           | 2.049130                | 0.601825  | 0.516223  |
| 11            | 7             | 0           | 0.869330                | -0.202345 | -0.052501 |
| 12            | 1             | 0           | 0.702956                | -1.413591 | 1.662777  |
| 13            | 1             | 0           | 3.929264                | -0.290330 | -0.157344 |
| 14            | 1             | 0           | 3.730446                | -0.251071 | 1.585520  |
| 15            | 6             | 0           | 2.468383                | 1.836742  | -0.265643 |
| 16            | 6             | 0           | 0.961702                | -0.380540 | -1.548993 |

|    |   |   |           |           |           |
|----|---|---|-----------|-----------|-----------|
| 17 | 8 | 0 | 1.438688  | 2.817429  | -0.226475 |
| 18 | 1 | 0 | 3.381047  | 2.210878  | 0.216793  |
| 19 | 1 | 0 | 2.725148  | 1.568597  | -1.296540 |
| 20 | 1 | 0 | 0.222536  | -1.161922 | -1.793923 |
| 21 | 1 | 0 | 0.725397  | 0.568046  | -2.027859 |
| 22 | 1 | 0 | 1.714053  | 3.595008  | -0.722177 |
| 23 | 1 | 0 | 1.973526  | -0.689754 | -1.807995 |
| 24 | 1 | 0 | 1.709323  | 0.918537  | 1.504813  |
| 25 | 6 | 0 | -1.722689 | -0.082021 | -0.385606 |
| 26 | 6 | 0 | -2.931812 | 0.699839  | 0.118946  |
| 27 | 8 | 0 | -3.507168 | 1.495120  | -0.599687 |
| 28 | 6 | 0 | -3.443901 | 0.407964  | 1.517506  |
| 29 | 1 | 0 | -3.686955 | -0.654979 | 1.610721  |
| 30 | 1 | 0 | -4.329745 | 1.011249  | 1.713422  |
| 31 | 1 | 0 | -2.683048 | 0.625699  | 2.273845  |
| 32 | 6 | 0 | -0.468434 | 0.449724  | 0.325163  |
| 33 | 1 | 0 | -0.542218 | 0.321989  | 1.407620  |
| 34 | 1 | 0 | -0.337707 | 1.509351  | 0.112019  |
| 35 | 1 | 0 | -1.657976 | 0.162301  | -1.448384 |
| 36 | 1 | 0 | -1.914733 | -1.904872 | 0.801166  |

Zero-point Energy: B3LYP/6-311++G(d,p) = -712.026167 (a.u.) Zero-point Correction = 0.316672 (a.u.)

SCF Energy: B3LYP (PCM, 1,4-dioxane)/6-311++G(d,p) = -712.362517 (a.u.)

B3LYP (PCM, H<sub>2</sub>O)/6-311++G(d,p) = -712.394060 (a.u.)

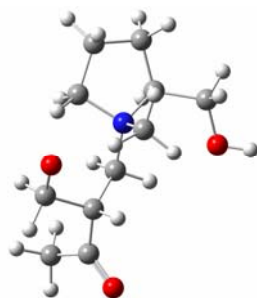

**syn-TSa2:**

Standard orientation:

| Center<br>Number | Atomic<br>Number | Atomic<br>Type | Coordinates (Angstroms) |           |           |
|------------------|------------------|----------------|-------------------------|-----------|-----------|
|                  |                  |                | X                       | Y         | Z         |
| 1                | 6                | 0              | 1.960127                | -1.806472 | -0.415489 |
| 2                | 8                | 0              | 1.470414                | -2.297628 | 0.838599  |
| 3                | 1                | 0              | 3.020629                | -2.025364 | -0.574777 |
| 4                | 1                | 0              | -0.454254               | -2.320160 | 0.151871  |
| 5                | 6                | 0              | -2.650057               | -1.861268 | -0.098085 |

|    |   |   |           |           |           |
|----|---|---|-----------|-----------|-----------|
| 6  | 6 | 0 | -1.164060 | -1.671244 | -0.376838 |
| 7  | 6 | 0 | -3.276188 | -0.467889 | -0.351583 |
| 8  | 1 | 0 | -2.819857 | -2.187988 | 0.929621  |
| 9  | 1 | 0 | -3.067541 | -2.630042 | -0.749152 |
| 10 | 6 | 0 | -2.091107 | 0.515844  | -0.498417 |
| 11 | 7 | 0 | -0.869838 | -0.238609 | 0.043676  |
| 12 | 1 | 0 | -0.963348 | -1.714227 | -1.448507 |
| 13 | 1 | 0 | -3.931919 | -0.171178 | 0.471247  |
| 14 | 1 | 0 | -3.879912 | -0.449443 | -1.260346 |
| 15 | 6 | 0 | -2.391097 | 1.865781  | 0.135411  |
| 16 | 6 | 0 | -0.784220 | -0.156756 | 1.540471  |
| 17 | 8 | 0 | -1.327658 | 2.776240  | -0.112503 |
| 18 | 1 | 0 | -3.323511 | 2.218004  | -0.324925 |
| 19 | 1 | 0 | -2.577195 | 1.754911  | 1.210107  |
| 20 | 1 | 0 | -0.094577 | -0.928789 | 1.873714  |
| 21 | 1 | 0 | -0.416034 | 0.828253  | 1.819121  |
| 22 | 1 | 0 | -1.554435 | 3.640624  | 0.244799  |
| 23 | 1 | 0 | -1.771875 | -0.322947 | 1.968647  |
| 24 | 1 | 0 | -1.858989 | 0.676140  | -1.553210 |
| 25 | 6 | 0 | 1.742218  | -0.312910 | -0.154267 |
| 26 | 6 | 0 | 2.910280  | 0.589156  | -0.149152 |
| 27 | 8 | 0 | 4.044098  | 0.210839  | -0.418226 |
| 28 | 6 | 0 | 2.716993  | 2.045380  | 0.291355  |
| 29 | 1 | 0 | 2.509462  | 2.674867  | -0.581452 |
| 30 | 1 | 0 | 3.651504  | 2.391160  | 0.733794  |
| 31 | 1 | 0 | 1.903201  | 2.181240  | 1.007757  |
| 32 | 6 | 0 | 0.453359  | 0.293687  | -0.630594 |
| 33 | 1 | 0 | 0.261689  | 0.104026  | -1.693240 |
| 34 | 1 | 0 | 0.410280  | 1.366082  | -0.464838 |
| 35 | 1 | 0 | 1.402595  | -2.200742 | -1.284011 |
| 36 | 1 | 0 | 1.590629  | -0.929637 | 0.998227  |

Zero-point Energy: B3LYP/6-311++G(d,p) = -711.982828 (a.u.) Zero-point Correction = 0.312867 (a.u.)

SCF Energy: B3LYP (PCM, 1,4-dioxane)/6-311++G(d,p) = -712.316015 (a.u.)

B3LYP (PCM, H<sub>2</sub>O)/6-311++G(d,p) = -712.346188 (a.u.)

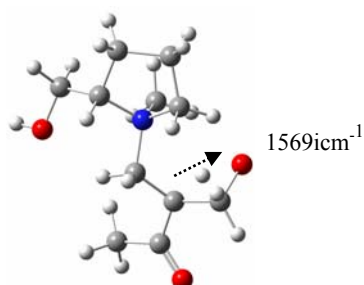

**syn-TSb1:**

Standard orientation:

| Center<br>Number | Atomic<br>Number | Atomic<br>Type | Coordinates (Angstroms) |           |           |
|------------------|------------------|----------------|-------------------------|-----------|-----------|
|                  |                  |                | X                       | Y         | Z         |
| 1                | 1                | 0              | -0.336715               | -2.492726 | 0.863019  |
| 2                | 6                | 0              | -2.493083               | -2.260567 | 0.342723  |
| 3                | 6                | 0              | -0.994775               | -2.017682 | 0.138112  |
| 4                | 6                | 0              | -3.176972               | -0.976026 | -0.195558 |
| 5                | 1                | 0              | -2.725783               | -2.416701 | 1.397449  |
| 6                | 1                | 0              | -2.811462               | -3.157289 | -0.189935 |
| 7                | 6                | 0              | -2.042420               | -0.001517 | -0.573066 |
| 8                | 7                | 0              | -0.824048               | -0.521472 | 0.208785  |
| 9                | 1                | 0              | -0.679988               | -2.319055 | -0.861642 |
| 10               | 1                | 0              | -3.830889               | -0.534300 | 0.560754  |
| 11               | 1                | 0              | -3.797353               | -1.174883 | -1.070452 |
| 12               | 6                | 0              | -2.415645               | 1.478929  | -0.365617 |
| 13               | 6                | 0              | -0.862156               | -0.059963 | 1.635219  |
| 14               | 8                | 0              | -1.576738               | 2.418568  | -0.985603 |
| 15               | 1                | 0              | -3.400277               | 1.587660  | -0.833078 |
| 16               | 1                | 0              | -2.556125               | 1.688641  | 0.702084  |
| 17               | 1                | 0              | -0.142154               | -0.642794 | 2.203058  |
| 18               | 1                | 0              | -0.582672               | 0.992103  | 1.673327  |
| 19               | 1                | 0              | -0.778020               | 2.604068  | -0.447904 |
| 20               | 1                | 0              | -1.860946               | -0.209658 | 2.041716  |
| 21               | 1                | 0              | -1.760563               | -0.131408 | -1.620520 |
| 22               | 6                | 0              | 1.736333                | -0.103408 | 0.324466  |
| 23               | 6                | 0              | 2.923352                | -0.806349 | -0.065497 |
| 24               | 8                | 0              | 3.876561                | -0.975705 | 0.707675  |
| 25               | 6                | 0              | 3.061380                | -1.313375 | -1.509009 |
| 26               | 1                | 0              | 2.393679                | -2.162573 | -1.697005 |
| 27               | 1                | 0              | 4.087386                | -1.649144 | -1.655211 |
| 28               | 1                | 0              | 2.830556                | -0.539467 | -2.247812 |
| 29               | 6                | 0              | 0.507176                | -0.030246 | -0.487549 |
| 30               | 1                | 0              | 0.566109                | -0.614930 | -1.405958 |
| 31               | 1                | 0              | 0.227368                | 0.988185  | -0.748574 |
| 32               | 1                | 0              | 1.673713                | 0.079309  | 1.387175  |
| 33               | 6                | 0              | 1.977648                | 2.229110  | 0.392005  |
| 34               | 8                | 0              | 0.800442                | 2.623384  | 0.527878  |
| 35               | 1                | 0              | 2.644157                | 2.124340  | 1.255851  |
| 36               | 1                | 0              | 2.481156                | 2.267524  | -0.584817 |

Zero-point Energy: B3LYP/6-311++G(d,p) = -712.026075 (a.u.) Zero-point Correction = 0.315072 (a.u.)

SCF Energy: B3LYP (PCM, 1,4-dioxane)/6-311++G(d,p) = -712.356350 (a.u.)

B3LYP (PCM, H<sub>2</sub>O)/6-311++G(d,p) = -712.379642 (a.u.)

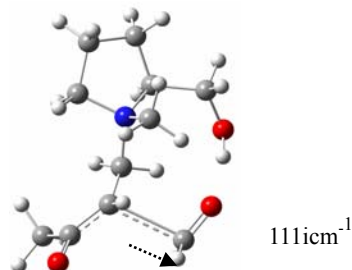

**syn-IMb2:**

Standard orientation:

| Center<br>Number | Atomic<br>Number | Atomic<br>Type | Coordinates (Angstroms) |           |           |
|------------------|------------------|----------------|-------------------------|-----------|-----------|
|                  |                  |                | X                       | Y         | Z         |
| 1                | 1                | 0              | 0.843094                | -2.620938 | -0.685327 |
| 2                | 6                | 0              | 2.897907                | -1.936094 | -0.168274 |
| 3                | 6                | 0              | 1.379767                | -1.984077 | 0.017245  |
| 4                | 6                | 0              | 3.302508                | -0.517587 | 0.314913  |
| 5                | 1                | 0              | 3.174222                | -2.094108 | -1.211524 |
| 6                | 1                | 0              | 3.373683                | -2.727382 | 0.412291  |
| 7                | 6                | 0              | 1.995331                | 0.216658  | 0.655836  |
| 8                | 7                | 0              | 0.909748                | -0.552861 | -0.141274 |
| 9                | 1                | 0              | 1.127044                | -2.290720 | 1.032711  |
| 10               | 1                | 0              | 3.858976                | 0.018627  | -0.457495 |
| 11               | 1                | 0              | 3.941936                | -0.553887 | 1.197689  |
| 12               | 6                | 0              | 2.025818                | 1.739682  | 0.434724  |
| 13               | 6                | 0              | 0.952392                | -0.176815 | -1.605586 |
| 14               | 8                | 0              | 0.897404                | 2.410300  | 0.880658  |
| 15               | 1                | 0              | 2.904136                | 2.081459  | 1.002362  |
| 16               | 1                | 0              | 2.246339                | 1.944300  | -0.624619 |
| 17               | 1                | 0              | 0.439799                | -0.951238 | -2.173282 |
| 18               | 1                | 0              | 0.440028                | 0.791600  | -1.711414 |
| 19               | 1                | 0              | 0.166781                | 2.366559  | 0.112126  |
| 20               | 1                | 0              | 1.992223                | -0.128987 | -1.921594 |
| 21               | 1                | 0              | 1.721489                | 0.032608  | 1.697834  |
| 22               | 6                | 0              | -1.678763               | -0.121050 | -0.420321 |
| 23               | 6                | 0              | -2.964853               | -0.735094 | 0.103597  |
| 24               | 8                | 0              | -3.756625               | -1.251585 | -0.660947 |
| 25               | 6                | 0              | -3.282193               | -0.622743 | 1.587046  |
| 26               | 1                | 0              | -2.755896               | -1.409290 | 2.140043  |
| 27               | 1                | 0              | -4.352171               | -0.762801 | 1.737244  |
| 28               | 1                | 0              | -2.967563               | 0.338263  | 2.001132  |

|    |   |   |           |           |           |
|----|---|---|-----------|-----------|-----------|
| 29 | 6 | 0 | -0.479965 | -0.340242 | 0.517797  |
| 30 | 1 | 0 | -0.617943 | -1.221011 | 1.144612  |
| 31 | 1 | 0 | -0.354997 | 0.529489  | 1.158718  |
| 32 | 1 | 0 | -1.518002 | -0.578806 | -1.395836 |
| 33 | 6 | 0 | -1.883385 | 1.451460  | -0.646546 |
| 34 | 8 | 0 | -0.719337 | 2.075430  | -0.979819 |
| 35 | 1 | 0 | -2.662606 | 1.545749  | -1.421842 |
| 36 | 1 | 0 | -2.327737 | 1.842797  | 0.293355  |

Zero-point Energy: B3LYP/6-311++G(d,p) = -712.042389 (a.u.) Zero-point Correction = 0.316869 (a.u.)

SCF Energy: B3LYP (PCM, 1,4-dioxane)/6-311++G(d,p) = -712.375055 (a.u.)

B3LYP (PCM, H<sub>2</sub>O)/6-311++G(d,p) = -712.401804 (a.u.)

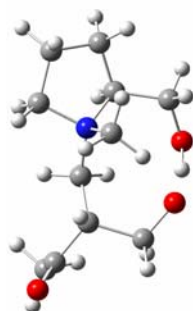

**syn-TSb2:**

Standard orientation:

| Center<br>Number | Atomic<br>Number | Atomic<br>Type | Coordinates (Angstroms) |           |           |
|------------------|------------------|----------------|-------------------------|-----------|-----------|
|                  |                  |                | X                       | Y         | Z         |
| 1                | 1                | 0              | -2.240226               | -2.483931 | 0.635767  |
| 2                | 6                | 0              | -2.680052               | -1.474016 | -1.220026 |
| 3                | 6                | 0              | -1.702920               | -2.090010 | -0.228384 |
| 4                | 6                | 0              | -2.999172               | -0.138410 | -0.549544 |
| 5                | 1                | 0              | -3.552975               | -2.113209 | -1.362848 |
| 6                | 1                | 0              | -2.211736               | -1.323694 | -2.196382 |
| 7                | 6                | 0              | -1.644520               | 0.367742  | -0.049885 |
| 8                | 7                | 0              | -0.825361               | -0.941317 | 0.264658  |
| 9                | 1                | 0              | -1.061085               | -2.874417 | -0.627852 |
| 10               | 1                | 0              | -3.687463               | -0.289369 | 0.289842  |
| 11               | 1                | 0              | -3.451476               | 0.596346  | -1.216366 |
| 12               | 6                | 0              | -1.720456               | 1.453591  | 1.054253  |
| 13               | 6                | 0              | -0.520372               | -1.139195 | 1.712308  |
| 14               | 8                | 0              | -1.660749               | 2.716900  | 0.457169  |
| 15               | 1                | 0              | -2.674242               | 1.370770  | 1.586777  |
| 16               | 1                | 0              | -0.913893               | 1.331982  | 1.782874  |
| 17               | 1                | 0              | -0.150368               | -2.156068 | 1.847631  |

|    |   |   |           |           |           |
|----|---|---|-----------|-----------|-----------|
| 18 | 1 | 0 | 0.242597  | -0.429924 | 2.020478  |
| 19 | 1 | 0 | -1.426166 | -0.997882 | 2.300121  |
| 20 | 1 | 0 | -1.103291 | 0.817924  | -0.875625 |
| 21 | 6 | 0 | 1.515768  | 0.128972  | -0.332612 |
| 22 | 6 | 0 | 2.918293  | -0.304049 | -0.103553 |
| 23 | 8 | 0 | 3.878969  | 0.320979  | -0.524797 |
| 24 | 6 | 0 | 3.183127  | -1.547846 | 0.753648  |
| 25 | 1 | 0 | 3.234064  | -2.438074 | 0.116045  |
| 26 | 1 | 0 | 2.429381  | -1.722595 | 1.524937  |
| 27 | 1 | 0 | 4.158061  | -1.428769 | 1.225860  |
| 28 | 6 | 0 | 0.522486  | -0.977929 | -0.556833 |
| 29 | 1 | 0 | 0.928399  | -1.958027 | -0.302998 |
| 30 | 1 | 0 | 0.179614  | -1.014123 | -1.593615 |
| 31 | 1 | 0 | -0.697365 | 2.790549  | 0.176439  |
| 32 | 6 | 0 | 1.317438  | 1.447752  | -1.096679 |
| 33 | 8 | 0 | 0.858331  | 2.253946  | -0.007699 |
| 34 | 1 | 0 | 2.256934  | 1.816241  | -1.518129 |
| 35 | 1 | 0 | 0.586165  | 1.366390  | -1.922008 |
| 36 | 1 | 0 | 1.182467  | 1.034895  | 0.562898  |

Zero-point Energy: B3LYP/6-311++G(d,p) = -711.989839 (a.u.) Zero-point Correction = 0.313246 (a.u.)

SCF Energy: B3LYP (PCM, 1,4-dioxane)/6-311++G(d,p) = -712.320249 (a.u.)

B3LYP (PCM, H<sub>2</sub>O)/6-311++G(d,p) = -712.348151 (a.u.)

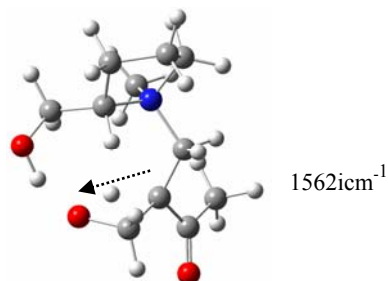

**anti-TSc1:**

Standard orientation:

| Center Number | Atomic Number | Atomic Type | Coordinates (Angstroms) |           |           |
|---------------|---------------|-------------|-------------------------|-----------|-----------|
|               |               |             | X                       | Y         | Z         |
| 1             | 1             | 0           | -0.208382               | 0.656854  | -1.381511 |
| 2             | 1             | 0           | 1.615296                | -0.533010 | -2.065259 |
| 3             | 6             | 0           | 1.652453                | -1.297794 | -1.290751 |
| 4             | 6             | 0           | 3.043938                | -1.396170 | -0.639683 |
| 5             | 7             | 0           | 0.709813                | -0.850190 | -0.195103 |
| 6             | 1             | 0           | 1.281477                | -2.232198 | -1.710503 |
| 7             | 6             | 0           | 2.938138                | -0.608583 | 0.694955  |



|    |   |   |           |           |           |
|----|---|---|-----------|-----------|-----------|
| 8  | 1 | 0 | 3.796207  | -0.969799 | -1.303911 |
| 9  | 1 | 0 | 3.326568  | -2.434998 | -0.463114 |
| 10 | 6 | 0 | 1.575093  | 0.102471  | 0.648520  |
| 11 | 6 | 0 | 0.307400  | -2.027474 | 0.643044  |
| 12 | 1 | 0 | 3.727228  | 0.132550  | 0.811729  |
| 13 | 1 | 0 | 3.005267  | -1.280292 | 1.552248  |
| 14 | 6 | 0 | 1.689732  | 1.509668  | 0.043251  |
| 15 | 1 | 0 | 1.107067  | 0.188259  | 1.627853  |
| 16 | 1 | 0 | 1.190815  | -2.524096 | 1.038689  |
| 17 | 1 | 0 | -0.329360 | -1.677020 | 1.451640  |
| 18 | 1 | 0 | -0.253562 | -2.718278 | 0.015187  |
| 19 | 8 | 0 | 2.528478  | 2.235907  | 0.946779  |
| 20 | 1 | 0 | 2.165355  | 1.470509  | -0.946232 |
| 21 | 1 | 0 | 0.716156  | 1.992941  | -0.076508 |
| 22 | 1 | 0 | 2.217906  | 3.145601  | 0.973650  |
| 23 | 6 | 0 | -0.571380 | -0.196750 | -0.794533 |
| 24 | 6 | 0 | -1.564785 | 0.261289  | 0.211402  |
| 25 | 1 | 0 | -0.967796 | -0.951924 | -1.475663 |
| 26 | 6 | 0 | -2.756278 | -0.506029 | 0.528308  |
| 27 | 1 | 0 | -1.132814 | 0.713864  | 1.100918  |
| 28 | 8 | 0 | -3.328094 | -0.403370 | 1.615675  |
| 29 | 6 | 0 | -3.389326 | -1.389644 | -0.551255 |
| 30 | 1 | 0 | -4.453777 | -1.482848 | -0.335971 |
| 31 | 1 | 0 | -2.957605 | -2.397248 | -0.521149 |
| 32 | 1 | 0 | -3.258291 | -0.994859 | -1.562107 |
| 33 | 6 | 0 | -2.114632 | 2.001348  | -0.584943 |
| 34 | 8 | 0 | -1.070691 | 2.558449  | -1.046243 |
| 35 | 1 | 0 | -2.885626 | 1.637693  | -1.294210 |
| 36 | 1 | 0 | -2.570493 | 2.367751  | 0.350362  |

Zero-point Energy: B3LYP/6-311++G(d,p) = -712.021880 (a.u.) Zero-point Correction = 0.315040 (a.u.)

SCF Energy: B3LYP (PCM, 1,4-dioxane)/6-311++G(d,p) = -712.355914 (a.u.)

B3LYP (PCM, H<sub>2</sub>O)/6-311++G(d,p) = -712.385500 (a.u.)

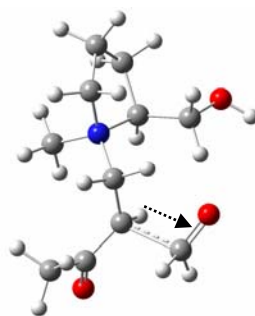

175icm<sup>-1</sup>

**anti-IMc2:**

Standard orientation:

---

| Center<br>Number | Atomic<br>Number | Atomic<br>Type | Coordinates (Angstroms) |           |           |
|------------------|------------------|----------------|-------------------------|-----------|-----------|
|                  |                  |                | X                       | Y         | Z         |
| 1                | 1                | 0              | -1.853528               | -0.926531 | 1.272381  |
| 2                | 1                | 0              | 1.344709                | -1.382317 | -1.893083 |
| 3                | 6                | 0              | 1.589358                | -1.707310 | -0.881177 |
| 4                | 6                | 0              | 3.058633                | -1.430610 | -0.537899 |
| 5                | 7                | 0              | 0.771531                | -0.851599 | 0.063784  |
| 6                | 1                | 0              | 1.282299                | -2.746930 | -0.768254 |
| 7                | 6                | 0              | 3.056898                | -0.071518 | 0.215958  |
| 8                | 1                | 0              | 3.654325                | -1.395657 | -1.450984 |
| 9                | 1                | 0              | 3.474623                | -2.226586 | 0.081579  |
| 10               | 6                | 0              | 1.611284                | 0.445399  | 0.188017  |
| 11               | 6                | 0              | 0.710003                | -1.493357 | 1.430106  |
| 12               | 1                | 0              | 3.710602                | 0.665724  | -0.249822 |
| 13               | 1                | 0              | 3.407298                | -0.197905 | 1.241340  |
| 14               | 6                | 0              | 1.376843                | 1.456718  | -0.943534 |
| 15               | 1                | 0              | 1.221903                | 0.914724  | 1.102745  |
| 16               | 1                | 0              | 1.718459                | -1.754758 | 1.743743  |
| 17               | 1                | 0              | 0.261800                | -0.745317 | 2.094266  |
| 18               | 1                | 0              | 0.101928                | -2.395425 | 1.359727  |
| 19               | 8                | 0              | 2.119974                | 2.632670  | -0.648993 |
| 20               | 1                | 0              | 1.748469                | 1.105039  | -1.911680 |
| 21               | 1                | 0              | 0.316872                | 1.697958  | -1.040632 |
| 22               | 1                | 0              | 1.720443                | 3.044014  | 0.128110  |
| 23               | 1                | 0              | -0.572901               | -0.113172 | -1.391957 |
| 24               | 6                | 0              | -0.650284               | -0.723120 | -0.492256 |
| 25               | 6                | 0              | -1.755149               | -0.213374 | 0.449946  |
| 26               | 1                | 0              | -0.904092               | -1.739279 | -0.806745 |
| 27               | 6                | 0              | -3.071992               | -0.349494 | -0.326875 |
| 28               | 8                | 0              | -3.719826               | -1.376475 | -0.260999 |
| 29               | 6                | 0              | -3.546587               | 0.821072  | -1.162097 |
| 30               | 1                | 0              | -3.681712               | 1.702265  | -0.528133 |
| 31               | 1                | 0              | -4.485995               | 0.563650  | -1.650224 |
| 32               | 1                | 0              | -2.800879               | 1.091979  | -1.916238 |
| 33               | 6                | 0              | -1.509537               | 1.202685  | 1.094696  |
| 34               | 8                | 0              | -0.444856               | 1.217287  | 1.920849  |
| 35               | 1                | 0              | -1.449268               | 1.934096  | 0.244441  |
| 36               | 1                | 0              | -2.475234               | 1.455225  | 1.596766  |

---

Zero-point Energy: B3LYP/6-311++G(d,p) = -712.023144 (a.u.) Zero-point Correction = 0.317200 (a.u.)

SCF Energy: B3LYP (PCM, 1,4-dioxane)/6-311++G(d,p) = -712.357470 (a.u.)

B3LYP (PCM, H<sub>2</sub>O)/6-311++G(d,p) = -712.385938 (a.u.)

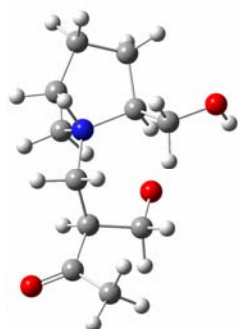

**anti-TSc2:**

Standard orientation:

| Center Number | Atomic Number | Atomic Type | Coordinates (Angstroms) |           |           |
|---------------|---------------|-------------|-------------------------|-----------|-----------|
|               |               |             | X                       | Y         | Z         |
| 1             | 1             | 0           | -0.202181               | -0.103823 | -1.798293 |
| 2             | 1             | 0           | 1.779300                | -1.071164 | -1.917867 |
| 3             | 6             | 0           | 1.788502                | -1.583036 | -0.955170 |
| 4             | 6             | 0           | 3.150242                | -1.438810 | -0.251777 |
| 5             | 7             | 0           | 0.790781                | -0.862922 | -0.077319 |
| 6             | 1             | 0           | 1.460649                | -2.611145 | -1.107468 |
| 7             | 6             | 0           | 2.970074                | -0.270732 | 0.758248  |
| 8             | 1             | 0           | 3.927055                | -1.227906 | -0.987471 |
| 9             | 1             | 0           | 3.435511                | -2.361439 | 0.255702  |
| 10            | 6             | 0           | 1.608018                | 0.356024  | 0.421553  |
| 11            | 6             | 0           | 0.434245                | -1.719930 | 1.100110  |
| 12            | 1             | 0           | 3.750284                | 0.484611  | 0.670472  |
| 13            | 1             | 0           | 3.005875                | -0.635914 | 1.785841  |
| 14            | 6             | 0           | 1.727598                | 1.521701  | -0.601203 |
| 15            | 1             | 0           | 1.076586                | 0.750520  | 1.282523  |
| 16            | 1             | 0           | 1.322575                | -1.954187 | 1.679820  |
| 17            | 1             | 0           | -0.279574               | -1.174365 | 1.713096  |
| 18            | 1             | 0           | -0.017526               | -2.641176 | 0.735633  |
| 19            | 8             | 0           | 1.582664                | 2.744885  | 0.059093  |
| 20            | 1             | 0           | 2.719331                | 1.507297  | -1.064984 |
| 21            | 1             | 0           | 0.997058                | 1.412435  | -1.410166 |
| 22            | 1             | 0           | 0.639766                | 2.724281  | 0.416800  |
| 23            | 6             | 0           | -0.536971               | -0.580441 | -0.878033 |
| 24            | 6             | 0           | -1.608179               | 0.223583  | -0.181472 |
| 25            | 1             | 0           | -0.862538               | -1.590293 | -1.134281 |
| 26            | 6             | 0           | -2.944946               | -0.403287 | -0.028753 |
| 27            | 8             | 0           | -3.975017               | 0.254367  | 0.001222  |
| 28            | 6             | 0           | -3.057617               | -1.921609 | 0.157205  |

|    |   |   |           |           |           |
|----|---|---|-----------|-----------|-----------|
| 29 | 1 | 0 | -2.912810 | -2.442918 | -0.796073 |
| 30 | 1 | 0 | -4.064508 | -2.141754 | 0.509234  |
| 31 | 1 | 0 | -2.334933 | -2.321912 | 0.871784  |
| 32 | 6 | 0 | -1.575113 | 1.743184  | -0.396607 |
| 33 | 8 | 0 | -0.845910 | 2.112349  | 0.785892  |
| 34 | 1 | 0 | -1.070704 | 2.056532  | -1.324957 |
| 35 | 1 | 0 | -2.587385 | 2.154024  | -0.404114 |
| 36 | 1 | 0 | -1.146320 | 0.776067  | 0.931740  |

Zero-point Energy: B3LYP/6-311++G(d,p) = -711.986765 (a.u.) Zero-point Correction = 0.313489 (a.u.)

SCF Energy: B3LYP (PCM, 1,4-dioxane)/6-311++G(d,p) = -712.317610 (a.u.)

B3LYP (PCM, H<sub>2</sub>O)/6-311++G(d,p) = -712.345376 (a.u.)

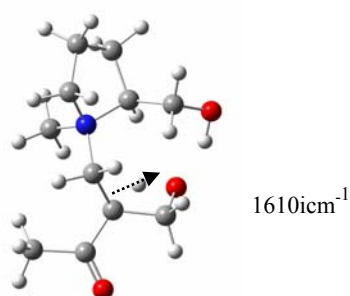

**anti-TSd1:**

Standard orientation:

| Center Number | Atomic Number | Atomic Type | Coordinates (Angstroms) |           |           |
|---------------|---------------|-------------|-------------------------|-----------|-----------|
|               |               |             | X                       | Y         | Z         |
| 1             | 1             | 0           | -1.577146               | -0.655864 | 2.024530  |
| 2             | 6             | 0           | -1.770419               | -1.252917 | 1.134165  |
| 3             | 6             | 0           | -3.197127               | -1.045785 | 0.600850  |
| 4             | 7             | 0           | -0.844623               | -0.740329 | 0.048257  |
| 5             | 1             | 0           | -1.505337               | -2.285998 | 1.351617  |
| 6             | 6             | 0           | -3.065579               | -0.028239 | -0.565501 |
| 7             | 1             | 0           | -3.841705               | -0.670972 | 1.396619  |
| 8             | 1             | 0           | -3.633171               | -1.984201 | 0.256081  |
| 9             | 6             | 0           | -1.603824               | 0.448095  | -0.547114 |
| 10            | 6             | 0           | 0.537994                | -0.423675 | 0.641122  |
| 11            | 6             | 0           | -0.680112               | -1.823514 | -0.995880 |
| 12            | 1             | 0           | -3.729082               | 0.828821  | -0.456715 |
| 13            | 1             | 0           | -3.307773               | -0.498747 | -1.519466 |
| 14            | 6             | 0           | -1.420589               | 1.745678  | 0.261583  |
| 15            | 1             | 0           | -1.203523               | 0.616725  | -1.545913 |
| 16            | 6             | 0           | 1.522484                | 0.073217  | -0.367503 |
| 17            | 1             | 0           | 0.365522                | 0.263056  | 1.470858  |

|    |   |   |           |           |           |
|----|---|---|-----------|-----------|-----------|
| 18 | 1 | 0 | 0.861382  | -1.399351 | 1.046282  |
| 19 | 1 | 0 | -1.646412 | -2.281953 | -1.195640 |
| 20 | 1 | 0 | -0.289003 | -1.378395 | -1.906841 |
| 21 | 1 | 0 | 0.047919  | -2.545010 | -0.616144 |
| 22 | 8 | 0 | -2.195155 | 2.777896  | -0.338428 |
| 23 | 1 | 0 | -1.795847 | 1.631273  | 1.282372  |
| 24 | 1 | 0 | -0.366373 | 2.021347  | 0.306249  |
| 25 | 6 | 0 | 2.766331  | -1.632641 | -0.479890 |
| 26 | 6 | 0 | 2.412015  | 1.169213  | -0.070912 |
| 27 | 8 | 0 | 2.165762  | -2.581296 | 0.095246  |
| 28 | 8 | 0 | 2.966767  | 1.831782  | -0.954436 |
| 29 | 6 | 0 | 2.751740  | 1.454963  | 1.395538  |
| 30 | 1 | 0 | 2.804028  | -1.580313 | -1.581330 |
| 31 | 1 | 0 | 3.654908  | 2.063311  | 1.432859  |
| 32 | 1 | 0 | 2.904820  | 0.538520  | 1.973418  |
| 33 | 1 | 0 | 1.944639  | 2.020883  | 1.877707  |
| 34 | 1 | 0 | 3.652375  | -1.174402 | -0.008421 |
| 35 | 1 | 0 | 1.207357  | 0.071731  | -1.405230 |
| 36 | 1 | 0 | -1.651694 | 3.248425  | -0.978493 |

Zero-point Energy: B3LYP/6-311++G(d,p) = -712.017653 (a.u.) Zero-point Correction = 0.314904 (a.u.)

SCF Energy: B3LYP (PCM, 1,4-dioxane)/6-311++G(d,p) = -712.350982 (a.u.)

B3LYP (PCM, H<sub>2</sub>O)/6-311++G(d,p) = -712.379737 (a.u.)

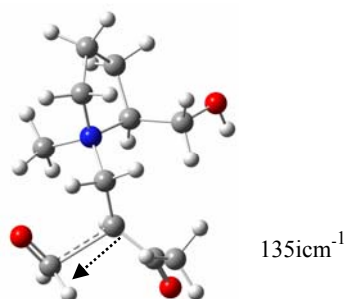

**anti-IMd2:**

Standard orientation:

| Center Number | Atomic Number | Atomic Type | Coordinates (Angstroms) |           |           |
|---------------|---------------|-------------|-------------------------|-----------|-----------|
|               |               |             | X                       | Y         | Z         |
| 1             | 1             | 0           | 1.468971                | -0.697764 | -2.216125 |
| 2             | 6             | 0           | 1.669926                | -1.307717 | -1.335583 |
| 3             | 6             | 0           | 3.107872                | -1.109910 | -0.821555 |
| 4             | 7             | 0           | 0.773171                | -0.807589 | -0.220602 |
| 5             | 1             | 0           | 1.407439                | -2.340466 | -1.562659 |
| 6             | 6             | 0           | 2.996048                | -0.108001 | 0.364202  |

|    |   |   |           |           |           |
|----|---|---|-----------|-----------|-----------|
| 7  | 1 | 0 | 3.735882  | -0.721514 | -1.624342 |
| 8  | 1 | 0 | 3.549094  | -2.055002 | -0.502297 |
| 9  | 6 | 0 | 1.550572  | 0.404148  | 0.337696  |
| 10 | 6 | 0 | -0.630659 | -0.506689 | -0.751432 |
| 11 | 6 | 0 | 0.692950  | -1.873717 | 0.857649  |
| 12 | 1 | 0 | 3.681086  | 0.733402  | 0.265197  |
| 13 | 1 | 0 | 3.224580  | -0.595223 | 1.312506  |
| 14 | 6 | 0 | 1.438872  | 1.664934  | -0.538896 |
| 15 | 1 | 0 | 1.076980  | 0.593463  | 1.311181  |
| 16 | 6 | 0 | -1.595841 | 0.309729  | 0.126310  |
| 17 | 1 | 0 | -0.479827 | 0.014327  | -1.699246 |
| 18 | 1 | 0 | -1.048798 | -1.489014 | -0.983532 |
| 19 | 1 | 0 | 1.696976  | -2.232824 | 1.070315  |
| 20 | 1 | 0 | 0.243618  | -1.377072 | 1.738238  |
| 21 | 1 | 0 | 0.089511  | -2.693042 | 0.468912  |
| 22 | 8 | 0 | 2.105683  | 2.734403  | 0.118695  |
| 23 | 1 | 0 | 1.956058  | 1.544840  | -1.495214 |
| 24 | 1 | 0 | 0.401382  | 1.930609  | -0.747137 |
| 25 | 6 | 0 | -2.940827 | 0.348571  | -0.599780 |
| 26 | 8 | 0 | -3.275622 | 1.330610  | -1.234755 |
| 27 | 6 | 0 | -3.868239 | -0.842750 | -0.459003 |
| 28 | 1 | 0 | -4.759002 | -0.685676 | -1.066260 |
| 29 | 1 | 0 | -4.152381 | -0.959357 | 0.591679  |
| 30 | 1 | 0 | -3.379422 | -1.775790 | -0.755029 |
| 31 | 1 | 0 | -1.259348 | 1.347628  | 0.147810  |
| 32 | 1 | 0 | 1.594596  | 2.977346  | 0.900143  |
| 33 | 6 | 0 | -1.713838 | -0.118669 | 1.648127  |
| 34 | 8 | 0 | -0.589498 | 0.155300  | 2.334674  |
| 35 | 1 | 0 | -2.616908 | 0.414095  | 2.024611  |
| 36 | 1 | 0 | -2.008196 | -1.201927 | 1.650135  |

Zero-point Energy: B3LYP/6-311++G(d,p) = -712.021667 (a.u.) Zero-point Correction = 0.317138 (a.u.)

SCF Energy: B3LYP (PCM, 1,4-dioxane)/6-311++G(d,p) = -712.356062 (a.u.)

B3LYP (PCM, H<sub>2</sub>O)/6-311++G(d,p) = -712.386273 (a.u.)

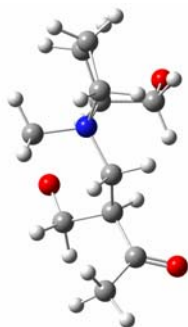

*anti*-TSd2:

Standard orientation:

| Center<br>Number | Atomic<br>Number | Atomic<br>Type | Coordinates (Angstroms) |           |           |
|------------------|------------------|----------------|-------------------------|-----------|-----------|
|                  |                  |                | X                       | Y         | Z         |
| 1                | 1                | 0              | 1.582088                | 0.366038  | -2.186623 |
| 2                | 6                | 0              | 1.895790                | -0.509746 | -1.618880 |
| 3                | 6                | 0              | 3.263241                | -0.292960 | -0.953537 |
| 4                | 7                | 0              | 0.909198                | -0.689376 | -0.484849 |
| 5                | 1                | 0              | 1.842596                | -1.378839 | -2.273497 |
| 6                | 6                | 0              | 2.950693                | 0.143568  | 0.504253  |
| 7                | 1                | 0              | 3.825541                | 0.467008  | -1.497392 |
| 8                | 1                | 0              | 3.861900                | -1.204586 | -0.972672 |
| 9                | 6                | 0              | 1.420828                | 0.286567  | 0.590939  |
| 10               | 6                | 0              | -0.544356               | -0.456511 | -1.016552 |
| 11               | 6                | 0              | 1.036026                | -2.093180 | 0.060697  |
| 12               | 1                | 0              | 3.415909                | 1.092850  | 0.767147  |
| 13               | 1                | 0              | 3.313870                | -0.595815 | 1.218796  |
| 14               | 6                | 0              | 0.975664                | 1.741269  | 0.358628  |
| 15               | 1                | 0              | 0.993228                | -0.065094 | 1.529848  |
| 16               | 6                | 0              | -1.657339               | -0.370498 | -0.003378 |
| 17               | 1                | 0              | -0.472260               | 0.459958  | -1.600596 |
| 18               | 1                | 0              | -0.667304               | -1.285179 | -1.724496 |
| 19               | 1                | 0              | 2.085405                | -2.306400 | 0.251811  |
| 20               | 1                | 0              | 0.448336                | -2.128588 | 0.986047  |
| 21               | 1                | 0              | 0.654741                | -2.782393 | -0.691220 |
| 22               | 8                | 0              | 1.522047                | 2.565663  | 1.381268  |
| 23               | 1                | 0              | 1.368052                | 2.137563  | -0.582328 |
| 24               | 1                | 0              | -0.111384               | 1.813315  | 0.343383  |
| 25               | 6                | 0              | -2.835069               | 0.423960  | -0.414477 |
| 26               | 8                | 0              | -3.971425               | 0.149034  | -0.049029 |
| 27               | 6                | 0              | -2.646712               | 1.676576  | -1.279248 |
| 28               | 1                | 0              | -3.502322               | 2.331243  | -1.114842 |
| 29               | 1                | 0              | -2.639674               | 1.398903  | -2.339778 |
| 30               | 1                | 0              | -1.727469               | 2.230657  | -1.071093 |
| 31               | 1                | 0              | 0.998149                | 2.453258  | 2.182319  |
| 32               | 6                | 0              | -1.886666               | -1.579238 | 0.908807  |
| 33               | 8                | 0              | -1.020256               | -1.182621 | 1.979428  |
| 34               | 1                | 0              | -2.936779               | -1.636945 | 1.208397  |
| 35               | 1                | 0              | -1.613234               | -2.551763 | 0.463829  |
| 36               | 1                | 0              | -1.159304               | -0.064996 | 1.180064  |

Zero-point Energy: B3LYP/6-311++G(d,p) = -711.979393 (a.u.) Zero-point Correction = 0.313238 (a.u.)

SCF Energy: B3LYP (PCM, 1,4-dioxane)/6-311++G(d,p) = -712.310485 (a.u.)

B3LYP (PCM, H<sub>2</sub>O)/6-311++G(d,p) = -712.339072 (a.u.)

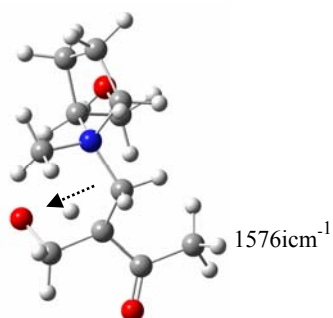

*syn-a-H<sub>2</sub>O*:

Standard orientation:

| Center Number | Atomic Number | Atomic Type | Coordinates (Angstroms) |           |           |
|---------------|---------------|-------------|-------------------------|-----------|-----------|
|               |               |             | X                       | Y         | Z         |
| 1             | 6             | 0           | -2.060855               | 1.086646  | -0.750898 |
| 2             | 8             | 0           | -1.350854               | 2.191409  | -0.393609 |
| 3             | 1             | 0           | -3.153378               | 1.200466  | -0.582035 |
| 4             | 1             | 0           | 0.298519                | 1.830411  | -1.151263 |
| 5             | 6             | 0           | 2.541662                | 1.505919  | -1.286472 |
| 6             | 6             | 0           | 1.082844                | 1.067773  | -1.306407 |
| 7             | 6             | 0           | 3.320126                | 0.275114  | -0.756790 |
| 8             | 1             | 0           | 2.682931                | 2.370881  | -0.636217 |
| 9             | 1             | 0           | 2.864003                | 1.802117  | -2.285244 |
| 10            | 6             | 0           | 2.253177                | -0.746158 | -0.304404 |
| 11            | 7             | 0           | 0.962950                | 0.078608  | -0.147956 |
| 12            | 1             | 0           | 0.865886                | 0.489987  | -2.207577 |
| 13            | 1             | 0           | 3.975994                | 0.547132  | 0.074297  |
| 14            | 1             | 0           | 3.951432                | -0.176462 | -1.523696 |
| 15            | 6             | 0           | 2.701850                | -1.546824 | 0.907983  |
| 16            | 6             | 0           | 0.929548                | 0.818772  | 1.164492  |
| 17            | 8             | 0           | 1.772226                | -2.588748 | 1.177041  |
| 18            | 1             | 0           | 3.687288                | -1.959596 | 0.654370  |
| 19            | 1             | 0           | 2.832100                | -0.892377 | 1.776754  |
| 20            | 1             | 0           | 0.150394                | 1.575484  | 1.098226  |
| 21            | 1             | 0           | 0.711123                | 0.111557  | 1.962211  |
| 22            | 1             | 0           | 2.043944                | -3.070849 | 1.964458  |
| 23            | 1             | 0           | 1.897331                | 1.286702  | 1.335277  |
| 24            | 1             | 0           | 2.029175                | -1.444714 | -1.113645 |
| 25            | 6             | 0           | -1.642344               | -0.199035 | 0.053279  |
| 26            | 6             | 0           | -2.659689               | -1.343160 | -0.068163 |
| 27            | 8             | 0           | -3.002924               | -1.974286 | 0.910651  |
| 28            | 6             | 0           | -3.235583               | -1.651009 | -1.437047 |



|    |   |   |           |           |           |
|----|---|---|-----------|-----------|-----------|
| 29 | 1 | 0 | -3.778142 | -0.780608 | -1.817297 |
| 30 | 1 | 0 | -3.909049 | -2.504363 | -1.365381 |
| 31 | 1 | 0 | -2.442905 | -1.866643 | -2.160413 |
| 32 | 6 | 0 | -0.274616 | -0.814026 | -0.297212 |
| 33 | 1 | 0 | -0.250731 | -1.149892 | -1.337204 |
| 34 | 1 | 0 | -0.084562 | -1.671414 | 0.345760  |
| 35 | 1 | 0 | -1.963134 | 0.842309  | -1.835899 |
| 36 | 1 | 0 | -1.647998 | 0.064660  | 1.113801  |
| 37 | 1 | 0 | -1.501924 | 2.790951  | 1.082707  |
| 38 | 8 | 0 | -1.405689 | 3.050029  | 2.054386  |
| 39 | 1 | 0 | -1.837748 | 3.902706  | 2.145794  |

Zero-point Energy: B3LYP/6-311++G(d,p) = -788.483915 (a.u.) Zero-point Correction = 0.341541 (a.u.)

SCF Energy: B3LYP (PCM, 1,4-dioxane)/6-311++G(d,p) = -788.844753 (a.u.)

B3LYP (PCM, H<sub>2</sub>O)/6-311++G(d,p) = -788.875489 (a.u.)

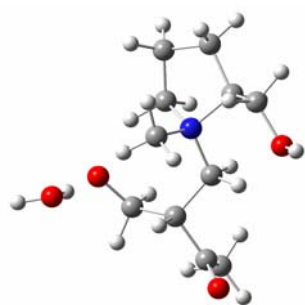

***syn*-TSa-H<sub>2</sub>O:**

Standard orientation:

| Center Number | Atomic Number | Atomic Type | Coordinates (Angstroms) |           |           |
|---------------|---------------|-------------|-------------------------|-----------|-----------|
|               |               |             | X                       | Y         | Z         |
| 1             | 6             | 0           | 2.310602                | -1.012106 | -1.246250 |
| 2             | 8             | 0           | 1.736471                | -2.314778 | -1.108529 |
| 3             | 1             | 0           | 3.383741                | -1.034191 | -1.047922 |
| 4             | 1             | 0           | -0.317858               | -2.128454 | 0.677165  |
| 5             | 6             | 0           | -2.504746               | -2.030253 | 0.293357  |
| 6             | 6             | 0           | -1.046773               | -1.694017 | -0.005164 |
| 7             | 6             | 0           | -3.312234               | -0.801185 | -0.184621 |
| 8             | 1             | 0           | -2.656846               | -2.205916 | 1.359968  |
| 9             | 1             | 0           | -2.795834               | -2.945127 | -0.223784 |
| 10            | 6             | 0           | -2.274245               | 0.285208  | -0.539559 |
| 11            | 7             | 0           | -0.954534               | -0.177021 | 0.102134  |
| 12            | 1             | 0           | -0.759638               | -1.950425 | -1.023853 |
| 13            | 1             | 0           | -3.994548               | -0.449382 | 0.593873  |
| 14            | 1             | 0           | -3.921020               | -1.023792 | -1.062318 |

|    |   |   |           |           |           |
|----|---|---|-----------|-----------|-----------|
| 15 | 6 | 0 | -2.765495 | 1.673405  | -0.157931 |
| 16 | 6 | 0 | -0.861987 | 0.218213  | 1.546609  |
| 17 | 8 | 0 | -1.845928 | 2.668179  | -0.591344 |
| 18 | 1 | 0 | -3.737260 | 1.798492  | -0.653012 |
| 19 | 1 | 0 | -2.937335 | 1.735402  | 0.923109  |
| 20 | 1 | 0 | 0.003898  | -0.295001 | 1.971103  |
| 21 | 1 | 0 | -0.759424 | 1.298749  | 1.610689  |
| 22 | 1 | 0 | -2.202788 | 3.540443  | -0.396163 |
| 23 | 1 | 0 | -1.766666 | -0.099979 | 2.064216  |
| 24 | 1 | 0 | -2.068125 | 0.275018  | -1.611224 |
| 25 | 6 | 0 | 1.665474  | 0.014825  | -0.297236 |
| 26 | 6 | 0 | 2.572448  | 1.134979  | 0.062742  |
| 27 | 8 | 0 | 3.789941  | 1.050066  | -0.049142 |
| 28 | 6 | 0 | 1.997433  | 2.416895  | 0.672565  |
| 29 | 1 | 0 | 1.482183  | 3.018449  | -0.083539 |
| 30 | 1 | 0 | 2.827094  | 3.000272  | 1.069738  |
| 31 | 1 | 0 | 1.285063  | 2.212022  | 1.475156  |
| 32 | 6 | 0 | 0.259539  | 0.401717  | -0.714393 |
| 33 | 1 | 0 | 0.051215  | 0.048909  | -1.727702 |
| 34 | 1 | 0 | 0.078241  | 1.471909  | -0.686768 |
| 35 | 1 | 0 | 2.171629  | -0.733105 | -2.298331 |
| 36 | 1 | 0 | 1.759214  | -2.502701 | -0.147500 |
| 37 | 8 | 0 | 1.495437  | -1.760583 | 1.618641  |
| 38 | 1 | 0 | 2.263362  | -1.860976 | 2.190929  |
| 39 | 1 | 0 | 1.645984  | -0.720633 | 0.773523  |

Zero-point Energy: B3LYP/6-311++G(d,p) = -788.474299 (a.u.) Zero-point Correction = 0.339432 (a.u.)

SCF Energy: B3LYP (PCM, 1,4-dioxane)/6-311++G(d,p) = -788.830805 (a.u.)

B3LYP (PCM, H<sub>2</sub>O)/6-311++G(d,p) = -788.856164 (a.u.)

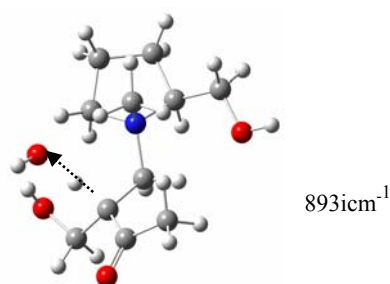

***syn-b-H<sub>2</sub>O***:

Standard orientation:

| Center Number | Atomic Number | Atomic Type | Coordinates (Angstroms) |           |          |
|---------------|---------------|-------------|-------------------------|-----------|----------|
|               |               |             | X                       | Y         | Z        |
| 1             | 1             | 0           | 1.727476                | -1.089916 | 1.625530 |

|    |   |   |           |           |           |
|----|---|---|-----------|-----------|-----------|
| 2  | 1 | 0 | 0.798120  | -2.292336 | -1.714476 |
| 3  | 6 | 0 | 2.863936  | -1.965936 | -0.950172 |
| 4  | 6 | 0 | 1.344165  | -2.069739 | -0.798209 |
| 5  | 6 | 0 | 3.292820  | -0.936334 | 0.129376  |
| 6  | 1 | 0 | 3.139486  | -1.629529 | -1.950300 |
| 7  | 1 | 0 | 3.324733  | -2.943222 | -0.801921 |
| 8  | 6 | 0 | 1.998782  | -0.436761 | 0.792125  |
| 9  | 7 | 0 | 0.899474  | -0.723411 | -0.263122 |
| 10 | 1 | 0 | 1.082565  | -2.812444 | -0.043957 |
| 11 | 1 | 0 | 3.847262  | -0.106554 | -0.314819 |
| 12 | 1 | 0 | 3.940642  | -1.381217 | 0.885584  |
| 13 | 6 | 0 | 2.055402  | 1.005571  | 1.321008  |
| 14 | 6 | 0 | 0.955912  | 0.290611  | -1.381673 |
| 15 | 8 | 0 | 0.959652  | 1.374750  | 2.098004  |
| 16 | 1 | 0 | 2.959392  | 1.038250  | 1.944534  |
| 17 | 1 | 0 | 2.225589  | 1.699346  | 0.486243  |
| 18 | 1 | 0 | 0.409575  | -0.102726 | -2.236069 |
| 19 | 1 | 0 | 0.500835  | 1.214659  | -1.029574 |
| 20 | 1 | 0 | 1.994750  | 0.447450  | -1.660098 |
| 21 | 6 | 0 | -1.685263 | -0.171458 | -0.289661 |
| 22 | 6 | 0 | -2.965220 | -0.984164 | -0.151927 |
| 23 | 8 | 0 | -3.731202 | -1.090440 | -1.088279 |
| 24 | 6 | 0 | -3.300043 | -1.605595 | 1.195871  |
| 25 | 1 | 0 | -4.379410 | -1.734365 | 1.272859  |
| 26 | 1 | 0 | -2.932588 | -1.008479 | 2.033273  |
| 27 | 1 | 0 | -2.839753 | -2.598015 | 1.264410  |
| 28 | 1 | 0 | -1.516051 | -0.083227 | -1.361787 |
| 29 | 6 | 0 | -0.487966 | -0.823698 | 0.425889  |
| 30 | 1 | 0 | -0.643190 | -1.893570 | 0.562952  |
| 31 | 1 | 0 | -0.351781 | -0.366679 | 1.403047  |
| 32 | 6 | 0 | -1.918770 | 1.292440  | 0.289014  |
| 33 | 1 | 0 | -2.378754 | 1.170871  | 1.290164  |
| 34 | 1 | 0 | -2.684905 | 1.757738  | -0.352381 |
| 35 | 8 | 0 | -0.757137 | 2.016431  | 0.343029  |
| 36 | 1 | 0 | 0.223400  | 1.716603  | 1.463996  |
| 37 | 8 | 0 | 0.109250  | 3.560949  | -1.617857 |
| 38 | 1 | 0 | 0.005013  | 4.500734  | -1.449514 |
| 39 | 1 | 0 | -0.315760 | 3.097356  | -0.844866 |

-----  
Zero-point Energy: B3LYP/6-311++G(d,p) = -788.496285 (a.u.) Zero-point Correction = 0.342681 (a.u.)

SCF Energy: B3LYP (PCM, 1,4-dioxane)/6-311++G(d,p) = -788.855284 (a.u.)

B3LYP (PCM, H<sub>2</sub>O)/6-311++G(d,p) = -788.882897 (a.u.)

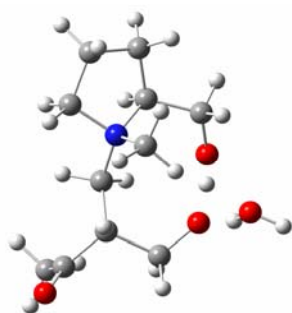

*syn*-TSb-H<sub>2</sub>O:

Standard orientation:

| Center Number | Atomic Number | Atomic Type | Coordinates (Angstroms) |           |           |
|---------------|---------------|-------------|-------------------------|-----------|-----------|
|               |               |             | X                       | Y         | Z         |
| 1             | 8             | 0           | -1.012629               | 0.560517  | 2.172617  |
| 2             | 1             | 0           | -1.825432               | 0.655165  | 2.681084  |
| 3             | 1             | 0           | 1.758753                | -1.748570 | -1.913524 |
| 4             | 6             | 0           | 3.108970                | -1.296478 | -0.204635 |
| 5             | 6             | 0           | 1.738914                | -1.403770 | -0.879553 |
| 6             | 6             | 0           | 2.977551                | -0.092614 | 0.763022  |
| 7             | 1             | 0           | 3.908470                | -1.136026 | -0.930872 |
| 8             | 1             | 0           | 3.333880                | -2.224629 | 0.321103  |
| 9             | 6             | 0           | 1.553798                | 0.459963  | 0.576695  |
| 10            | 7             | 0           | 1.150795                | -0.003968 | -0.841638 |
| 11            | 1             | 0           | 1.075725                | -2.026545 | -0.284121 |
| 12            | 1             | 0           | 3.728515                | 0.672260  | 0.544654  |
| 13            | 1             | 0           | 3.115725                | -0.386340 | 1.803772  |
| 14            | 6             | 0           | 1.433638                | 1.957166  | 0.851641  |
| 15            | 6             | 0           | 1.806490                | 0.839942  | -1.891654 |
| 16            | 8             | 0           | 0.129999                | 2.459007  | 0.724818  |
| 17            | 1             | 0           | 1.824985                | 2.094514  | 1.871513  |
| 18            | 1             | 0           | 2.087130                | 2.534838  | 0.189570  |
| 19            | 1             | 0           | 1.574180                | 0.416920  | -2.868439 |
| 20            | 1             | 0           | 1.415347                | 1.852322  | -1.830163 |
| 21            | 1             | 0           | 2.884857                | 0.850622  | -1.747522 |
| 22            | 1             | 0           | 0.866614                | -0.067815 | 1.231045  |
| 23            | 1             | 0           | -0.579123               | 1.007300  | -1.474456 |
| 24            | 6             | 0           | -0.375353               | -0.022305 | -1.199155 |
| 25            | 6             | 0           | -1.406142               | -0.499801 | -0.198241 |
| 26            | 1             | 0           | -0.373573               | -0.629496 | -2.115485 |
| 27            | 6             | 0           | -2.773984               | 0.004130  | -0.493748 |
| 28            | 8             | 0           | -3.779572               | -0.611451 | -0.155279 |
| 29            | 6             | 0           | -2.946813               | 1.378739  | -1.138525 |

|    |   |   |           |           |           |
|----|---|---|-----------|-----------|-----------|
| 30 | 1 | 0 | -3.973891 | 1.701298  | -0.971589 |
| 31 | 1 | 0 | -2.782883 | 1.319521  | -2.220842 |
| 32 | 1 | 0 | -2.256204 | 2.121759  | -0.731387 |
| 33 | 1 | 0 | -0.425037 | 1.935540  | 1.367634  |
| 34 | 6 | 0 | -1.367843 | -1.970351 | 0.191033  |
| 35 | 1 | 0 | -1.068637 | -2.622269 | -0.639978 |
| 36 | 1 | 0 | -2.366814 | -2.275681 | 0.504280  |
| 37 | 8 | 0 | -0.413181 | -2.240646 | 1.244595  |
| 38 | 1 | 0 | -0.596388 | -1.597276 | 1.948869  |
| 39 | 1 | 0 | -1.274060 | 0.113221  | 1.001021  |

Zero-point Energy: B3LYP/6-311++G(d,p) = -788.484681 (a.u.) Zero-point Correction = 0.340264 (a.u.)

SCF Energy: B3LYP (PCM, 1,4-dioxane)/6-311++G(d,p) = -788.837948 (a.u.)

B3LYP (PCM, H<sub>2</sub>O)/6-311++G(d,p) = -788.858027 (a.u.)

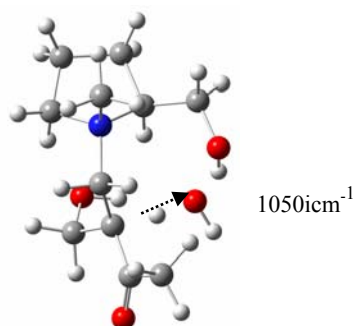

**anti-c-H<sub>2</sub>O:**

Standard orientation:

| Center Number | Atomic Number | Atomic Type | Coordinates (Angstroms) |           |           |
|---------------|---------------|-------------|-------------------------|-----------|-----------|
|               |               |             | X                       | Y         | Z         |
| 1             | 1             | 0           | -1.080215               | 0.522043  | 0.924790  |
| 2             | 1             | 0           | 1.585218                | -1.245880 | -2.048532 |
| 3             | 6             | 0           | 1.539934                | -1.856409 | -1.147859 |
| 4             | 6             | 0           | 2.907159                | -1.949422 | -0.442216 |
| 5             | 7             | 0           | 0.626534                | -1.136096 | -0.175621 |
| 6             | 1             | 0           | 1.094030                | -2.817988 | -1.401239 |
| 7             | 6             | 0           | 2.846987                | -0.930215 | 0.730443  |
| 8             | 1             | 0           | 3.701843                | -1.706450 | -1.147817 |
| 9             | 1             | 0           | 3.099794                | -2.960729 | -0.081315 |
| 10            | 6             | 0           | 1.585941                | -0.099230 | 0.467686  |
| 11            | 6             | 0           | 0.152729                | -2.110665 | 0.868010  |
| 12            | 1             | 0           | 3.706207                | -0.261207 | 0.755626  |
| 13            | 1             | 0           | 2.811757                | -1.440291 | 1.694633  |
| 14            | 6             | 0           | 1.911431                | 1.108574  | -0.442739 |

|    |   |   |           |           |           |
|----|---|---|-----------|-----------|-----------|
| 15 | 1 | 0 | 1.104367  | 0.272850  | 1.369974  |
| 16 | 1 | 0 | 1.005504  | -2.611526 | 1.317635  |
| 17 | 1 | 0 | -0.420551 | -1.583241 | 1.626316  |
| 18 | 1 | 0 | -0.487553 | -2.846846 | 0.382478  |
| 19 | 8 | 0 | 2.592993  | 2.055227  | 0.349398  |
| 20 | 1 | 0 | 2.578232  | 0.796444  | -1.256320 |
| 21 | 1 | 0 | 1.004623  | 1.542041  | -0.870143 |
| 22 | 1 | 0 | 1.893275  | 2.686551  | 0.648375  |
| 23 | 1 | 0 | -0.211170 | 0.191932  | -1.602028 |
| 24 | 6 | 0 | -0.588343 | -0.542842 | -0.891090 |
| 25 | 6 | 0 | -1.590770 | 0.166517  | 0.027226  |
| 26 | 1 | 0 | -1.036678 | -1.378413 | -1.434798 |
| 27 | 6 | 0 | -2.738692 | -0.709368 | 0.495255  |
| 28 | 8 | 0 | -2.833637 | -1.062223 | 1.658489  |
| 29 | 6 | 0 | -3.813318 | -1.071812 | -0.510730 |
| 30 | 1 | 0 | -4.425354 | -0.182829 | -0.698578 |
| 31 | 1 | 0 | -4.447720 | -1.860423 | -0.107169 |
| 32 | 1 | 0 | -3.399862 | -1.372334 | -1.477053 |
| 33 | 6 | 0 | -2.063233 | 1.498232  | -0.722977 |
| 34 | 8 | 0 | -1.000029 | 2.270731  | -1.033644 |
| 35 | 1 | 0 | -2.641497 | 1.184769  | -1.618570 |
| 36 | 1 | 0 | -2.795753 | 1.971194  | -0.035454 |
| 37 | 1 | 0 | -0.320294 | 2.965900  | 0.086754  |
| 38 | 8 | 0 | 0.275560  | 3.334553  | 0.863157  |
| 39 | 1 | 0 | 0.118011  | 4.280641  | 0.916534  |

Zero-point Energy: B3LYP/6-311++G(d,p) = -788.492202 (a.u.) Zero-point Correction = 0.342786 (a.u.)

SCF Energy: B3LYP (PCM, 1,4-dioxane)/6-311++G(d,p) = -788.851383 (a.u.)

B3LYP (PCM, H<sub>2</sub>O)/6-311++G(d,p) = -788.878513 (a.u.)

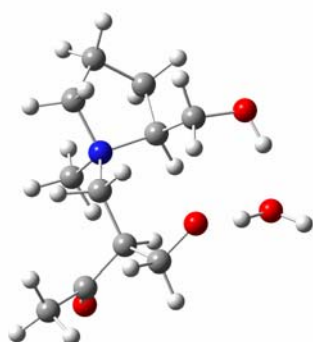

***anti*-TSc-H<sub>2</sub>O:**

Standard orientation:

| Center<br>Number | Atomic<br>Number | Atomic<br>Type | Coordinates (Angstroms) |   |   |
|------------------|------------------|----------------|-------------------------|---|---|
|                  |                  |                | X                       | Y | Z |

---

|    |   |   |           |           |           |
|----|---|---|-----------|-----------|-----------|
| 1  | 1 | 0 | -0.936693 | 2.641058  | -1.083631 |
| 2  | 1 | 0 | -1.977929 | -0.812417 | 2.029729  |
| 3  | 6 | 0 | -1.997092 | -1.448703 | 1.144899  |
| 4  | 6 | 0 | -3.316761 | -1.300572 | 0.365970  |
| 5  | 7 | 0 | -0.912466 | -0.936812 | 0.222844  |
| 6  | 1 | 0 | -1.759823 | -2.468309 | 1.448146  |
| 7  | 6 | 0 | -3.009921 | -0.303912 | -0.787095 |
| 8  | 1 | 0 | -4.098405 | -0.930421 | 1.030065  |
| 9  | 1 | 0 | -3.658466 | -2.261817 | -0.020948 |
| 10 | 6 | 0 | -1.606224 | 0.245038  | -0.494134 |
| 11 | 6 | 0 | -0.593970 | -1.975323 | -0.808881 |
| 12 | 1 | 0 | -3.714455 | 0.526275  | -0.826199 |
| 13 | 1 | 0 | -3.061465 | -0.801314 | -1.756941 |
| 14 | 6 | 0 | -1.667092 | 1.559299  | 0.313765  |
| 15 | 1 | 0 | -1.011079 | 0.456262  | -1.378892 |
| 16 | 1 | 0 | -1.493792 | -2.246555 | -1.354435 |
| 17 | 1 | 0 | 0.140109  | -1.560065 | -1.494581 |
| 18 | 1 | 0 | -0.189215 | -2.854631 | -0.312541 |
| 19 | 8 | 0 | -1.800908 | 2.615483  | -0.614711 |
| 20 | 1 | 0 | -2.551387 | 1.581385  | 0.959001  |
| 21 | 1 | 0 | -0.783090 | 1.700466  | 0.936320  |
| 22 | 1 | 0 | 0.054450  | 0.047386  | 1.823270  |
| 23 | 6 | 0 | 0.387647  | -0.624665 | 1.034184  |
| 24 | 6 | 0 | 1.549735  | 0.007982  | 0.291766  |
| 25 | 1 | 0 | 0.611551  | -1.591571 | 1.497872  |
| 26 | 6 | 0 | 2.616298  | -0.842395 | -0.297546 |
| 27 | 8 | 0 | 3.586423  | -0.329983 | -0.847959 |
| 28 | 6 | 0 | 2.589136  | -2.376806 | -0.262758 |
| 29 | 1 | 0 | 3.621576  | -2.709541 | -0.151266 |
| 30 | 1 | 0 | 2.230408  | -2.770687 | -1.218608 |
| 31 | 1 | 0 | 1.988923  | -2.812224 | 0.538693  |
| 32 | 6 | 0 | 2.184744  | 1.135825  | 1.155170  |
| 33 | 8 | 0 | 1.361538  | 2.290423  | 1.275233  |
| 34 | 1 | 0 | 2.363154  | 0.798218  | 2.184000  |
| 35 | 1 | 0 | 3.148371  | 1.385179  | 0.707497  |
| 36 | 1 | 0 | 1.178052  | 2.573107  | 0.358662  |
| 37 | 8 | 0 | 0.722596  | 1.840236  | -1.392344 |
| 38 | 1 | 0 | 1.380636  | 2.043216  | -2.065255 |
| 39 | 1 | 0 | 1.129638  | 0.840803  | -0.703676 |

---

Zero-point Energy: B3LYP/6-311++G(d,p) = -788.469236 (a.u.) Zero-point Correction = 0.340935 (a.u.)

SCF Energy: B3LYP (PCM, 1,4-dioxane)/6-311++G(d,p) = -788.824771 (a.u.)

B3LYP (PCM, H<sub>2</sub>O)/6-311++G(d,p) = -788.847967 (a.u.)

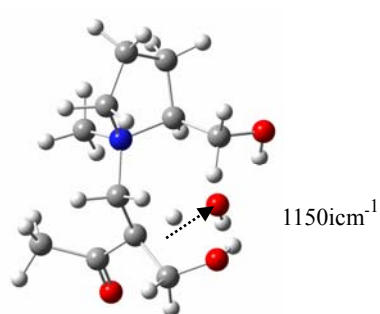

***anti-d-H<sub>2</sub>O***:

Standard orientation:

| Center Number | Atomic Number | Atomic Type | Coordinates (Angstroms) |           |           |
|---------------|---------------|-------------|-------------------------|-----------|-----------|
|               |               |             | X                       | Y         | Z         |
| 1             | 1             | 0           | 1.407499                | -2.069201 | -1.510313 |
| 2             | 6             | 0           | 1.622024                | -2.116545 | -0.443002 |
| 3             | 6             | 0           | 3.080396                | -1.733753 | -0.143793 |
| 4             | 7             | 0           | 0.774220                | -1.053327 | 0.229450  |
| 5             | 1             | 0           | 1.322240                | -3.096237 | -0.071282 |
| 6             | 6             | 0           | 3.042939                | -0.234237 | 0.264302  |
| 7             | 1             | 0           | 3.694192                | -1.902486 | -1.029335 |
| 8             | 1             | 0           | 3.496522                | -2.351453 | 0.653390  |
| 9             | 6             | 0           | 1.603047                | 0.235913  | 0.015811  |
| 10            | 6             | 0           | -0.636548               | -1.073816 | -0.358179 |
| 11            | 6             | 0           | 0.705659                | -1.335126 | 1.715662  |
| 12            | 1             | 0           | 3.722621                | 0.380901  | -0.324535 |
| 13            | 1             | 0           | 3.327375                | -0.107788 | 1.309674  |
| 14            | 6             | 0           | 1.458081                | 0.874420  | -1.381255 |
| 15            | 1             | 0           | 1.223042                | 0.935175  | 0.756313  |
| 16            | 6             | 0           | -1.614295               | 0.091954  | -0.084823 |
| 17            | 1             | 0           | -0.510802               | -1.160843 | -1.437649 |
| 18            | 1             | 0           | -1.058570               | -2.017879 | -0.001349 |
| 19            | 1             | 0           | 1.711707                | -1.509585 | 2.089404  |
| 20            | 1             | 0           | 0.259693                | -0.445406 | 2.181978  |
| 21            | 1             | 0           | 0.103593                | -2.231658 | 1.861793  |
| 22            | 8             | 0           | 2.034689                | 2.157204  | -1.328876 |
| 23            | 1             | 0           | 2.007601                | 0.302161  | -2.136959 |
| 24            | 1             | 0           | 0.413462                | 0.927152  | -1.697370 |
| 25            | 6             | 0           | -2.917841               | -0.356130 | -0.774708 |
| 26            | 8             | 0           | -3.040922               | -0.232977 | -1.976298 |
| 27            | 6             | 0           | -4.016503               | -0.968171 | 0.068217  |
| 28            | 1             | 0           | -4.831894               | -1.294721 | -0.576049 |
| 29            | 1             | 0           | -4.386174               | -0.236152 | 0.792065  |



|    |   |   |           |           |           |
|----|---|---|-----------|-----------|-----------|
| 30 | 1 | 0 | -3.637081 | -1.814748 | 0.648903  |
| 31 | 1 | 0 | -1.280217 | 0.959938  | -0.656489 |
| 32 | 1 | 0 | 1.443853  | 2.698284  | -0.754050 |
| 33 | 6 | 0 | -1.774884 | 0.583053  | 1.388124  |
| 34 | 8 | 0 | -0.652720 | 1.221032  | 1.843884  |
| 35 | 1 | 0 | -2.670370 | 1.237821  | 1.389905  |
| 36 | 1 | 0 | -2.054705 | -0.287003 | 2.022471  |
| 37 | 1 | 0 | -0.244997 | 2.415117  | 1.045160  |
| 38 | 8 | 0 | 0.133380  | 3.134897  | 0.391239  |
| 39 | 1 | 0 | 0.014024  | 3.995291  | 0.800436  |

Zero-point Energy: B3LYP/6-311++G(d,p) = -788.492182 (a.u.) Zero-point Correction = 0.343001 (a.u.)

SCF Energy: B3LYP (PCM, 1,4-dioxane)/6-311++G(d,p) = -788.849263 (a.u.)

B3LYP (PCM, H<sub>2</sub>O)/6-311++G(d,p) = -788.873049 (a.u.)

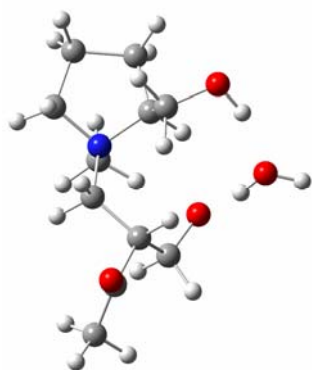

**anti-TSd-H<sub>2</sub>O:**

Standard orientation:

| Center<br>Number | Atomic<br>Number | Atomic<br>Type | Coordinates (Angstroms) |           |           |
|------------------|------------------|----------------|-------------------------|-----------|-----------|
|                  |                  |                | X                       | Y         | Z         |
| 1                | 1                | 0              | -1.847616               | -0.285901 | 2.239597  |
| 2                | 6                | 0              | -2.161508               | -0.936170 | 1.423688  |
| 3                | 6                | 0              | -3.468773               | -0.440579 | 0.775246  |
| 4                | 7                | 0              | -1.106827               | -0.832522 | 0.339559  |
| 5                | 1                | 0              | -2.195774               | -1.961344 | 1.791223  |
| 6                | 6                | 0              | -3.032455               | 0.337869  | -0.499249 |
| 7                | 1                | 0              | -4.009250               | 0.195878  | 1.476707  |
| 8                | 1                | 0              | -4.130276               | -1.271437 | 0.526401  |
| 9                | 6                | 0              | -1.507958               | 0.462744  | -0.389670 |
| 10               | 6                | 0              | 0.319948                | -0.856256 | 0.951761  |
| 11               | 6                | 0              | -1.263046               | -2.003965 | -0.598493 |
| 12               | 1                | 0              | -3.470664               | 1.333875  | -0.557071 |
| 13               | 1                | 0              | -3.332196               | -0.191870 | -1.404386 |

|    |   |   |           |           |           |
|----|---|---|-----------|-----------|-----------|
| 14 | 6 | 0 | -1.110143 | 1.760744  | 0.354401  |
| 15 | 1 | 0 | -0.990789 | 0.457373  | -1.344658 |
| 16 | 6 | 0 | 1.492188  | -0.435557 | 0.079077  |
| 17 | 1 | 0 | 0.248072  | -0.223892 | 1.832130  |
| 18 | 1 | 0 | 0.411780  | -1.892139 | 1.304243  |
| 19 | 1 | 0 | -2.300776 | -2.082126 | -0.911620 |
| 20 | 1 | 0 | -0.611640 | -1.846625 | -1.459409 |
| 21 | 1 | 0 | -0.980165 | -2.907331 | -0.059090 |
| 22 | 8 | 0 | -1.068481 | 2.805246  | -0.581569 |
| 23 | 1 | 0 | -1.858916 | 2.018458  | 1.111091  |
| 24 | 1 | 0 | -0.145901 | 1.649110  | 0.855345  |
| 25 | 6 | 0 | 2.674207  | 0.021394  | 0.858463  |
| 26 | 8 | 0 | 3.811132  | -0.031302 | 0.404115  |
| 27 | 6 | 0 | 2.481049  | 0.670738  | 2.230944  |
| 28 | 1 | 0 | 3.415445  | 1.157705  | 2.506371  |
| 29 | 1 | 0 | 2.249867  | -0.082833 | 2.992239  |
| 30 | 1 | 0 | 1.677274  | 1.412848  | 2.236607  |
| 31 | 1 | 0 | -0.260123 | 2.600134  | -1.121875 |
| 32 | 6 | 0 | 1.854446  | -1.381518 | -1.069975 |
| 33 | 8 | 0 | 1.096253  | -1.126319 | -2.268030 |
| 34 | 1 | 0 | 2.921130  | -1.279355 | -1.273647 |
| 35 | 1 | 0 | 1.663683  | -2.432474 | -0.817260 |
| 36 | 1 | 0 | 1.124954  | -0.156604 | -2.403762 |
| 37 | 1 | 0 | 1.280048  | 0.689637  | -0.638356 |
| 38 | 8 | 0 | 1.075661  | 1.565601  | -1.579786 |
| 39 | 1 | 0 | 1.905355  | 2.024090  | -1.752728 |

Zero-point Energy: B3LYP/6-311++G(d,p) = -788.479057 (a.u.) Zero-point Correction = 0.340746 (a.u.)

SCF Energy: B3LYP (PCM, 1,4-dioxane)/6-311++G(d,p) = -788.833552 (a.u.)

B3LYP (PCM, H<sub>2</sub>O)/6-311++G(d,p) = -788.855725 (a.u.)

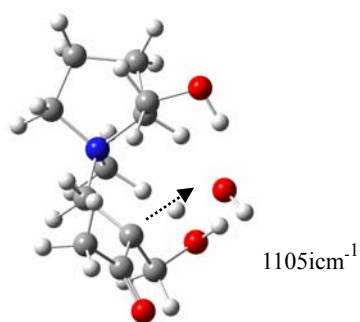

***re-syn-OH-TS1:***

Standard orientation:

Center Atomic Atomic Coordinates (Angstroms)

| Number | Number | Type | X         | Y         | Z         |
|--------|--------|------|-----------|-----------|-----------|
| 1      | 1      | 0    | 3.703896  | 2.071071  | -0.053950 |
| 2      | 6      | 0    | 4.834776  | 0.163397  | -0.153249 |
| 3      | 6      | 0    | 3.644470  | 1.062580  | -0.463017 |
| 4      | 6      | 0    | 4.248838  | -1.266070 | -0.209439 |
| 5      | 1      | 0    | 5.247111  | 0.382984  | 0.833302  |
| 6      | 1      | 0    | 5.636431  | 0.319378  | -0.876380 |
| 7      | 6      | 0    | 2.710041  | -1.118060 | -0.235016 |
| 8      | 7      | 0    | 2.429290  | 0.368572  | 0.111265  |
| 9      | 1      | 0    | 3.477224  | 1.130971  | -1.539595 |
| 10     | 1      | 0    | 4.568374  | -1.856271 | 0.652599  |
| 11     | 1      | 0    | 4.579132  | -1.800740 | -1.101046 |
| 12     | 6      | 0    | 2.019424  | -2.173148 | 0.634435  |
| 13     | 6      | 0    | 2.339166  | 0.609466  | 1.584526  |
| 14     | 8      | 0    | 0.632159  | -2.088680 | 0.724404  |
| 15     | 1      | 0    | 2.351598  | -3.135500 | 0.208399  |
| 16     | 1      | 0    | 2.422750  | -2.137833 | 1.653464  |
| 17     | 1      | 0    | 2.177644  | 1.673447  | 1.750513  |
| 18     | 1      | 0    | 1.497302  | 0.053410  | 1.985129  |
| 19     | 1      | 0    | 0.219378  | -1.914011 | -0.171990 |
| 20     | 1      | 0    | 3.264965  | 0.292632  | 2.063344  |
| 21     | 1      | 0    | 2.330453  | -1.212561 | -1.252755 |
| 22     | 6      | 0    | -1.195993 | -0.252112 | -1.331416 |
| 23     | 8      | 0    | -0.392454 | -1.225580 | -1.542707 |
| 24     | 6      | 0    | -0.149270 | 0.885010  | 0.064796  |
| 25     | 6      | 0    | -0.795248 | 2.118078  | 0.490400  |
| 26     | 8      | 0    | -1.596239 | 2.149572  | 1.424179  |
| 27     | 6      | 0    | -0.547808 | 3.410495  | -0.300666 |
| 28     | 1      | 0    | -0.459203 | 3.242877  | -1.378261 |
| 29     | 1      | 0    | 0.371653  | 3.902499  | 0.038933  |
| 30     | 1      | 0    | -1.375509 | 4.092571  | -0.107510 |
| 31     | 6      | 0    | 1.155825  | 0.941900  | -0.645941 |
| 32     | 1      | 0    | 1.435330  | 1.967766  | -0.883737 |
| 33     | 1      | 0    | 1.157217  | 0.337678  | -1.558045 |
| 34     | 6      | 0    | -2.514842 | -0.463131 | -0.653375 |
| 35     | 1      | 0    | -0.270459 | 0.086840  | 0.784473  |
| 36     | 1      | 0    | -1.249350 | 0.536298  | -2.102102 |
| 37     | 6      | 0    | -2.804741 | -1.665588 | 0.001357  |
| 38     | 6      | 0    | -3.498539 | 0.529876  | -0.707599 |
| 39     | 6      | 0    | -4.045970 | -1.860213 | 0.600181  |
| 40     | 6      | 0    | -5.018308 | -0.860935 | 0.546948  |
| 41     | 6      | 0    | -4.741717 | 0.335379  | -0.112928 |
| 42     | 1      | 0    | -3.287784 | 1.463800  | -1.218952 |

|    |   |   |           |           |           |
|----|---|---|-----------|-----------|-----------|
| 43 | 1 | 0 | -5.491346 | 1.117680  | -0.158632 |
| 44 | 1 | 0 | -5.985134 | -1.015024 | 1.013642  |
| 45 | 1 | 0 | -4.258904 | -2.796417 | 1.105258  |
| 46 | 1 | 0 | -2.056157 | -2.447593 | 0.028041  |

Zero-point Energy: B3LYP/6-311++G(d,p) = -943.059930 (a.u.) Zero-point Correction = 0.396157 (a.u.)

SCF Energy: B3LYP (PCM, 1,4-dioxane)/6-311++G(d,p) = -943.471709 (a.u.)

B3LYP (PCM, H<sub>2</sub>O)/6-311++G(d,p) = -943.498040 (a.u.)

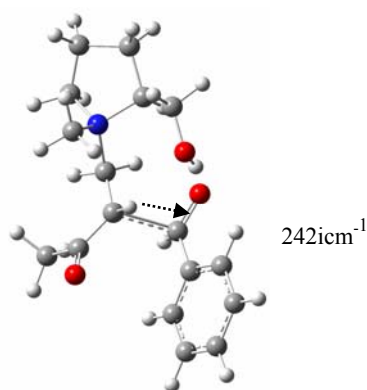

***si-syn-OH-TS2:***

Standard orientation:

| Center Number | Atomic Number | Atomic Type | Coordinates (Angstroms) |           |           |
|---------------|---------------|-------------|-------------------------|-----------|-----------|
|               |               |             | X                       | Y         | Z         |
| 1             | 1             | 0           | 2.531546                | 0.654948  | -2.672290 |
| 2             | 6             | 0           | 4.023336                | -0.737619 | -1.801066 |
| 3             | 6             | 0           | 2.615153                | -0.190249 | -1.989210 |
| 4             | 6             | 0           | 3.982236                | -1.397555 | -0.405150 |
| 5             | 1             | 0           | 4.764165                | 0.063520  | -1.838302 |
| 6             | 1             | 0           | 4.275260                | -1.442672 | -2.594372 |
| 7             | 6             | 0           | 2.696051                | -0.896227 | 0.292970  |
| 8             | 7             | 0           | 2.141589                | 0.237026  | -0.617046 |
| 9             | 1             | 0           | 1.931302                | -0.974827 | -2.318773 |
| 10            | 1             | 0           | 4.868123                | -1.139237 | 0.179758  |
| 11            | 1             | 0           | 3.956240                | -2.485715 | -0.478635 |
| 12            | 6             | 0           | 2.949623                | -0.543607 | 1.762828  |
| 13            | 6             | 0           | 2.700297                | 1.579451  | -0.269755 |
| 14            | 8             | 0           | 1.855515                | -0.069789 | 2.482716  |
| 15            | 1             | 0           | 3.359016                | -1.472904 | 2.195122  |
| 16            | 1             | 0           | 3.750515                | 0.201852  | 1.835489  |
| 17            | 1             | 0           | 2.296579                | 2.311470  | -0.967764 |
| 18            | 1             | 0           | 2.397852                | 1.840470  | 0.739546  |
| 19            | 1             | 0           | 1.041719                | -0.620702 | 2.280462  |

|    |   |   |           |           |           |
|----|---|---|-----------|-----------|-----------|
| 20 | 1 | 0 | 3.786804  | 1.553349  | -0.342928 |
| 21 | 1 | 0 | 1.911319  | -1.651753 | 0.255384  |
| 22 | 6 | 0 | -1.191368 | -0.364310 | 1.397468  |
| 23 | 8 | 0 | -0.304553 | -1.267631 | 1.575566  |
| 24 | 6 | 0 | -0.130879 | 1.107557  | 0.351449  |
| 25 | 6 | 0 | -0.963955 | 2.232531  | -0.033939 |
| 26 | 8 | 0 | -1.315037 | 3.081530  | 0.789457  |
| 27 | 6 | 0 | -1.507993 | 2.320950  | -1.461639 |
| 28 | 1 | 0 | -1.945185 | 1.373189  | -1.788930 |
| 29 | 1 | 0 | -0.717368 | 2.591570  | -2.171949 |
| 30 | 1 | 0 | -2.271405 | 3.097362  | -1.492131 |
| 31 | 6 | 0 | 0.559695  | 0.270578  | -0.659420 |
| 32 | 1 | 0 | 0.327662  | 0.590199  | -1.674797 |
| 33 | 1 | 0 | 0.315908  | -0.792880 | -0.553789 |
| 34 | 6 | 0 | -2.395009 | -0.678613 | 0.561944  |
| 35 | 1 | 0 | 0.401612  | 1.283793  | 1.275281  |
| 36 | 6 | 0 | -3.511357 | 0.168986  | 0.564907  |
| 37 | 6 | 0 | -2.436408 | -1.850309 | -0.202608 |
| 38 | 6 | 0 | -4.633324 | -0.137476 | -0.199578 |
| 39 | 6 | 0 | -4.659146 | -1.298393 | -0.975376 |
| 40 | 6 | 0 | -3.558399 | -2.154620 | -0.971734 |
| 41 | 1 | 0 | -1.591236 | -2.527137 | -0.155079 |
| 42 | 1 | 0 | -3.581990 | -3.068645 | -1.556141 |
| 43 | 1 | 0 | -5.535895 | -1.539055 | -1.566714 |
| 44 | 1 | 0 | -5.491635 | 0.525602  | -0.187095 |
| 45 | 1 | 0 | -3.492246 | 1.073016  | 1.164780  |
| 46 | 1 | 0 | -1.398502 | 0.356668  | 2.198731  |

Zero-point Energy: B3LYP/6-311++G(d,p) = -943.065465 (a.u.) Zero-point Correction = 0.396734 (a.u.)

SCF Energy: B3LYP (PCM, 1,4-dioxane)/6-311++G(d,p) = -943.476726 (a.u.)

B3LYP (PCM, H<sub>2</sub>O)/6-311++G(d,p) = -943.501280 (a.u.)

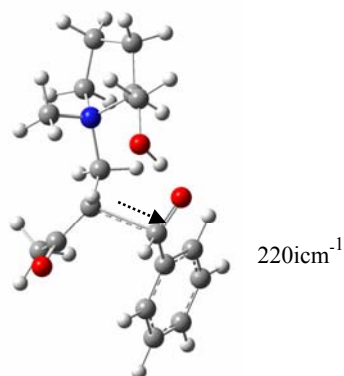

***re-anti-OH-TS3:***

Standard orientation:

| Center<br>Number | Atomic<br>Number | Atomic<br>Type | Coordinates (Angstroms) |           |           |
|------------------|------------------|----------------|-------------------------|-----------|-----------|
|                  |                  |                | X                       | Y         | Z         |
| 1                | 1                | 0              | 2.136008                | 1.691556  | 1.997516  |
| 2                | 6                | 0              | 2.878024                | -0.363866 | 2.405303  |
| 3                | 6                | 0              | 2.811426                | 0.932689  | 1.604134  |
| 4                | 6                | 0              | 3.309959                | -1.430348 | 1.368577  |
| 5                | 1                | 0              | 1.903163                | -0.609687 | 2.829378  |
| 6                | 1                | 0              | 3.578654                | -0.271252 | 3.235917  |
| 7                | 6                | 0              | 3.154540                | -0.776174 | -0.020994 |
| 8                | 7                | 0              | 2.344837                | 0.519229  | 0.227995  |
| 9                | 1                | 0              | 3.804778                | 1.372689  | 1.492323  |
| 10               | 1                | 0              | 2.689717                | -2.325480 | 1.446326  |
| 11               | 1                | 0              | 4.344751                | -1.741421 | 1.519717  |
| 12               | 6                | 0              | 2.580480                | -1.723927 | -1.092912 |
| 13               | 8                | 0              | 2.140897                | -1.069972 | -2.251523 |
| 14               | 1                | 0              | 3.398938                | -2.415643 | -1.337541 |
| 15               | 1                | 0              | 1.775067                | -2.327102 | -0.662731 |
| 16               | 1                | 0              | 1.140805                | -1.138674 | -2.253306 |
| 17               | 1                | 0              | 4.121255                | -0.403355 | -0.367053 |
| 18               | 6                | 0              | -1.223723               | -0.372335 | -1.492611 |
| 19               | 8                | 0              | -0.411877               | -1.337399 | -1.729535 |
| 20               | 6                | 0              | -0.068766               | 1.049782  | -0.663351 |
| 21               | 6                | 0              | -0.834893               | 2.204636  | -0.205548 |
| 22               | 8                | 0              | -1.217046               | 3.068185  | -0.995768 |
| 23               | 6                | 0              | -1.250507               | 2.305692  | 1.262191  |
| 24               | 1                | 0              | -0.408693               | 2.640757  | 1.880230  |
| 25               | 1                | 0              | -1.605058               | 1.350657  | 1.658732  |
| 26               | 1                | 0              | -2.044555               | 3.046681  | 1.346450  |
| 27               | 6                | 0              | 0.770090                | 0.250991  | 0.267848  |
| 28               | 1                | 0              | 0.670119                | -0.807440 | 0.022804  |
| 29               | 1                | 0              | 0.487140                | 0.401599  | 1.306464  |
| 30               | 6                | 0              | -2.364991               | -0.619102 | -0.539553 |
| 31               | 1                | 0              | -1.514944               | 0.293429  | -2.318334 |
| 32               | 6                | 0              | 2.725178                | 1.565086  | -0.777330 |
| 33               | 1                | 0              | 3.792550                | 1.759861  | -0.669070 |
| 34               | 1                | 0              | 2.155245                | 2.471794  | -0.587717 |
| 35               | 1                | 0              | 2.519663                | 1.180996  | -1.771489 |
| 36               | 6                | 0              | -2.350347               | -1.735974 | 0.302705  |
| 37               | 6                | 0              | -3.475156               | 0.234072  | -0.510747 |
| 38               | 6                | 0              | -4.534439               | -0.009847 | 0.360358  |
| 39               | 6                | 0              | -3.407705               | -1.979003 | 1.177533  |

|    |   |   |           |           |           |
|----|---|---|-----------|-----------|-----------|
| 40 | 6 | 0 | -4.502152 | -1.114606 | 1.212546  |
| 41 | 1 | 0 | -3.505208 | 1.093114  | -1.173327 |
| 42 | 1 | 0 | -5.389496 | 0.657619  | 0.369696  |
| 43 | 1 | 0 | -3.387672 | -2.852685 | 1.820945  |
| 44 | 1 | 0 | -1.514280 | -2.422195 | 0.232976  |
| 45 | 1 | 0 | -5.329616 | -1.307822 | 1.886522  |
| 46 | 1 | 0 | 0.369901  | 1.234305  | -1.635666 |

Zero-point Energy: B3LYP/6-311++G(d,p) = -943.063543 (a.u.) Zero-point Correction = 0.397231 (a.u.)

SCF Energy: B3LYP (PCM, 1,4-dioxane)/6-311++G(d,p) = -943.474656 (a.u.)

B3LYP (PCM, H<sub>2</sub>O)/6-311++G(d,p) = -943.498349 (a.u.)

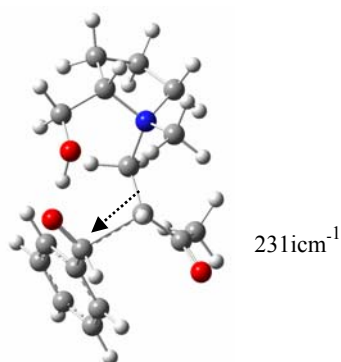

***si-anti-OH-TS4:***

Standard orientation:

| Center Number | Atomic Number | Atomic Type | Coordinates (Angstroms) |           |           |
|---------------|---------------|-------------|-------------------------|-----------|-----------|
|               |               |             | X                       | Y         | Z         |
| 1             | 1             | 0           | 1.859150                | 1.074847  | -2.277020 |
| 2             | 6             | 0           | 3.855123                | 0.518857  | -1.463685 |
| 3             | 6             | 0           | 2.431312                | 0.209570  | -1.945050 |
| 4             | 6             | 0           | 4.090682                | -0.417247 | -0.248818 |
| 5             | 1             | 0           | 3.957110                | 1.566150  | -1.177883 |
| 6             | 1             | 0           | 4.568843                | 0.337297  | -2.268138 |
| 7             | 6             | 0           | 2.821038                | -1.270308 | -0.114063 |
| 8             | 7             | 0           | 1.715780                | -0.406793 | -0.762265 |
| 9             | 1             | 0           | 2.433197                | -0.538857 | -2.738978 |
| 10            | 1             | 0           | 4.260617                | 0.161944  | 0.661603  |
| 11            | 1             | 0           | 4.960693                | -1.060315 | -0.386406 |
| 12            | 6             | 0           | 2.539571                | -1.770790 | 1.312709  |
| 13            | 8             | 0           | 1.347620                | -2.497767 | 1.449733  |
| 14            | 1             | 0           | 3.374873                | -2.440815 | 1.549956  |
| 15            | 1             | 0           | 2.594163                | -0.939501 | 2.024104  |
| 16            | 1             | 0           | 0.615645                | -1.878930 | 1.682542  |
| 17            | 1             | 0           | 2.885306                | -2.139802 | -0.772948 |

|    |   |   |           |           |           |
|----|---|---|-----------|-----------|-----------|
| 18 | 6 | 0 | -1.279551 | 0.286668  | 1.315949  |
| 19 | 8 | 0 | -0.497626 | -0.524336 | 1.914944  |
| 20 | 6 | 0 | -0.063627 | 1.331409  | -0.122105 |
| 21 | 6 | 0 | -0.279927 | 2.725110  | 0.216810  |
| 22 | 8 | 0 | -1.178685 | 3.397133  | -0.295787 |
| 23 | 6 | 0 | 0.572475  | 3.345328  | 1.324584  |
| 24 | 1 | 0 | 0.101610  | 4.270434  | 1.655226  |
| 25 | 1 | 0 | 1.574413  | 3.587960  | 0.950466  |
| 26 | 1 | 0 | 0.692052  | 2.669069  | 2.177015  |
| 27 | 6 | 0 | 1.252915  | 0.694750  | 0.207528  |
| 28 | 1 | 0 | 1.148831  | 0.196709  | 1.177447  |
| 29 | 1 | 0 | 2.083259  | 1.400682  | 0.262151  |
| 30 | 6 | 0 | -2.399913 | -0.231582 | 0.453824  |
| 31 | 6 | 0 | 0.576748  | -1.262002 | -1.245056 |
| 32 | 1 | 0 | 0.998383  | -2.122553 | -1.762409 |
| 33 | 1 | 0 | -0.035783 | -0.683411 | -1.930040 |
| 34 | 1 | 0 | -0.014614 | -1.590167 | -0.399218 |
| 35 | 6 | 0 | -3.260011 | 0.647663  | -0.220928 |
| 36 | 6 | 0 | -2.638846 | -1.607787 | 0.369812  |
| 37 | 6 | 0 | -3.699788 | -2.100301 | -0.390523 |
| 38 | 6 | 0 | -4.316635 | 0.154853  | -0.980234 |
| 39 | 6 | 0 | -4.540295 | -1.221341 | -1.070822 |
| 40 | 1 | 0 | -2.002424 | -2.282717 | 0.930673  |
| 41 | 1 | 0 | -3.878810 | -3.169442 | -0.437952 |
| 42 | 1 | 0 | -4.970971 | 0.845699  | -1.501112 |
| 43 | 1 | 0 | -3.081105 | 1.716340  | -0.166569 |
| 44 | 1 | 0 | -5.369614 | -1.601723 | -1.657244 |
| 45 | 1 | 0 | -0.550577 | 1.056919  | -1.048110 |
| 46 | 1 | 0 | -1.552807 | 1.214377  | 1.837988  |

Zero-point Energy: B3LYP/6-311++G(d,p) = -943.063164 (a.u.) Zero-point Correction = 0.397276 (a.u.)

SCF Energy: B3LYP (PCM, 1,4-dioxane)/6-311++G(d,p) = -943.474463 (a.u.)

B3LYP (PCM, H<sub>2</sub>O)/6-311++G(d,p) = -943.497715 (a.u.)

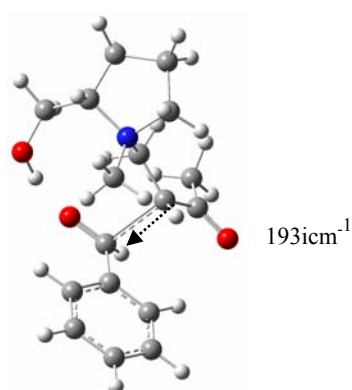



*si-syn-CH<sub>3</sub>-TS1*:

Standard orientation:

| Center<br>Number | Atomic<br>Number | Atomic<br>Type | Coordinates (Angstroms) |           |           |
|------------------|------------------|----------------|-------------------------|-----------|-----------|
|                  |                  |                | X                       | Y         | Z         |
| 1                | 1                | 0              | -2.541337               | -1.800531 | -2.028366 |
| 2                | 6                | 0              | -3.978293               | -1.863692 | -0.322482 |
| 3                | 6                | 0              | -2.989754               | -1.162976 | -1.268663 |
| 4                | 6                | 0              | -3.680025               | -1.272380 | 1.078100  |
| 5                | 1                | 0              | -3.846232               | -2.946317 | -0.335520 |
| 6                | 1                | 0              | -5.002231               | -1.663589 | -0.639819 |
| 7                | 6                | 0              | -2.687758               | -0.126676 | 0.840182  |
| 8                | 7                | 0              | -1.885153               | -0.616562 | -0.383913 |
| 9                | 1                | 0              | -3.444325               | -0.304208 | -1.762751 |
| 10               | 1                | 0              | -3.247256               | -2.025043 | 1.742391  |
| 11               | 1                | 0              | -4.573669               | -0.889404 | 1.571998  |
| 12               | 6                | 0              | -1.928387               | 0.343753  | 2.097029  |
| 13               | 6                | 0              | -0.934329               | -1.746648 | -0.074652 |
| 14               | 8                | 0              | -1.712568               | 1.733703  | 2.133084  |
| 15               | 1                | 0              | -2.586214               | 0.111159  | 2.941445  |
| 16               | 1                | 0              | -1.009591               | -0.229112 | 2.255301  |
| 17               | 1                | 0              | -0.319107               | -1.896449 | -0.965228 |
| 18               | 1                | 0              | -0.286037               | -1.476544 | 0.751938  |
| 19               | 1                | 0              | -1.503959               | -2.637493 | 0.181061  |
| 20               | 1                | 0              | -3.223064               | 0.747811  | 0.461863  |
| 21               | 1                | 0              | -0.823449               | 1.986032  | 1.824457  |
| 22               | 1                | 0              | -0.836366               | 0.005382  | -2.093263 |
| 23               | 6                | 0              | -1.143818               | 0.482322  | -1.145128 |
| 24               | 6                | 0              | 0.105127                | 0.960124  | -0.451467 |
| 25               | 1                | 0              | -1.883013               | 1.265973  | -1.321751 |
| 26               | 6                | 0              | 0.246037                | 2.408170  | -0.297341 |
| 27               | 8                | 0              | 0.585675                | 2.914160  | 0.777833  |
| 28               | 6                | 0              | 0.007981                | 3.304881  | -1.501025 |
| 29               | 1                | 0              | -0.956442               | 3.811231  | -1.383356 |
| 30               | 1                | 0              | 0.010489                | 2.761495  | -2.447792 |
| 31               | 1                | 0              | 0.775021                | 4.081038  | -1.521790 |
| 32               | 1                | 0              | 0.288254                | 0.487160  | 0.506774  |
| 33               | 6                | 0              | 1.504411                | 0.222425  | -1.545425 |
| 34               | 8                | 0              | 0.963449                | -0.591944 | -2.383228 |
| 35               | 6                | 0              | 2.472397                | -0.350014 | -0.514112 |
| 36               | 6                | 0              | 2.738614                | -1.722228 | -0.511167 |
| 37               | 6                | 0              | 3.143519                | 0.465307  | 0.406423  |
| 38               | 6                | 0              | 3.635098                | -2.273683 | 0.404926  |

|    |   |   |          |           |           |
|----|---|---|----------|-----------|-----------|
| 39 | 1 | 0 | 2.249967 | -2.335422 | -1.259792 |
| 40 | 6 | 0 | 4.039026 | -0.082649 | 1.321982  |
| 41 | 1 | 0 | 2.957503 | 1.534098  | 0.416624  |
| 42 | 6 | 0 | 4.285854 | -1.456865 | 1.328252  |
| 43 | 1 | 0 | 3.838407 | -3.339809 | 0.387371  |
| 44 | 1 | 0 | 4.547565 | 0.563167  | 2.030082  |
| 45 | 1 | 0 | 4.987673 | -1.882452 | 2.037364  |
| 46 | 1 | 0 | 1.916833 | 1.165383  | -1.955972 |

Zero-point Energy: B3LYP/6-311++G(d,p) = -943.054652 (a.u.) Zero-point Correction = 0.396744 (a.u.)

SCF Energy: B3LYP (PCM, 1,4-dioxane)/6-311++G(d,p) = -943.467120 (a.u.)

B3LYP (PCM, H<sub>2</sub>O)/6-311++G(d,p) = -943.494488 (a.u.)

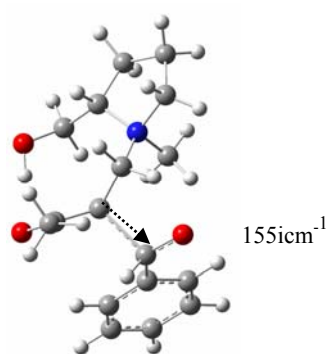

***re-syn-CH<sub>3</sub>-TS2:***

Standard orientation:

| Center<br>Number | Atomic<br>Number | Atomic<br>Type | Coordinates (Angstroms) |           |           |
|------------------|------------------|----------------|-------------------------|-----------|-----------|
|                  |                  |                | X                       | Y         | Z         |
| 1                | 1                | 0              | 2.851788                | -0.354817 | -2.274283 |
| 2                | 6                | 0              | 3.031667                | -2.093663 | -0.971362 |
| 3                | 6                | 0              | 2.278039                | -0.881448 | -1.511963 |
| 4                | 6                | 0              | 3.869165                | -1.532139 | 0.179042  |
| 5                | 1                | 0              | 3.632487                | -2.564102 | -1.750914 |
| 6                | 1                | 0              | 2.321777                | -2.838528 | -0.603257 |
| 7                | 6                | 0              | 2.907672                | -0.551099 | 0.847982  |
| 8                | 7                | 0              | 2.116098                | 0.090102  | -0.318088 |
| 9                | 1                | 0              | 1.273345                | -1.141150 | -1.872966 |
| 10               | 1                | 0              | 4.758039                | -1.012050 | -0.195969 |
| 11               | 1                | 0              | 4.203515                | -2.295780 | 0.884055  |
| 12               | 6                | 0              | 3.574405                | 0.416691  | 1.811228  |
| 13               | 6                | 0              | 2.629178                | 1.445101  | -0.689764 |
| 14               | 1                | 0              | 4.101314                | -0.200557 | 2.549256  |
| 15               | 1                | 0              | 4.324663                | 1.032996  | 1.301609  |
| 16               | 1                | 0              | 2.072667                | 1.795024  | -1.555214 |

|    |   |   |           |           |           |
|----|---|---|-----------|-----------|-----------|
| 17 | 1 | 0 | 2.473462  | 2.128232  | 0.141986  |
| 18 | 1 | 0 | 3.687506  | 1.374954  | -0.941017 |
| 19 | 1 | 0 | 2.154297  | -1.112572 | 1.403643  |
| 20 | 1 | 0 | 0.347735  | -0.877945 | 0.228374  |
| 21 | 6 | 0 | 0.615069  | 0.174379  | 0.083428  |
| 22 | 6 | 0 | -0.265357 | 0.773469  | -0.975490 |
| 23 | 1 | 0 | 0.600775  | 0.707458  | 1.031467  |
| 24 | 6 | 0 | -0.931140 | 2.063391  | -0.721938 |
| 25 | 8 | 0 | -1.257994 | 2.796139  | -1.652960 |
| 26 | 6 | 0 | -1.288873 | 2.458965  | 0.707216  |
| 27 | 1 | 0 | -2.048796 | 3.239146  | 0.675093  |
| 28 | 1 | 0 | -0.406756 | 2.861581  | 1.218853  |
| 29 | 1 | 0 | -1.658212 | 1.612260  | 1.290260  |
| 30 | 1 | 0 | 0.197298  | 0.805708  | -1.958985 |
| 31 | 8 | 0 | 2.582663  | 1.224584  | 2.436228  |
| 32 | 6 | 0 | -1.400296 | -0.632381 | -1.449063 |
| 33 | 8 | 0 | -0.626684 | -1.660920 | -1.579473 |
| 34 | 1 | 0 | -1.792525 | -0.158226 | -2.367228 |
| 35 | 6 | 0 | -2.504199 | -0.717810 | -0.404468 |
| 36 | 6 | 0 | -2.456019 | -1.707146 | 0.581848  |
| 37 | 6 | 0 | -3.603391 | 0.149401  | -0.431278 |
| 38 | 6 | 0 | -3.461752 | -1.805348 | 1.543315  |
| 39 | 1 | 0 | -1.635786 | -2.415542 | 0.551655  |
| 40 | 6 | 0 | -4.613072 | 0.050518  | 0.523509  |
| 41 | 1 | 0 | -3.667518 | 0.904196  | -1.209381 |
| 42 | 6 | 0 | -4.542337 | -0.924092 | 1.520748  |
| 43 | 1 | 0 | -3.413207 | -2.581625 | 2.300533  |
| 44 | 1 | 0 | -5.460296 | 0.727492  | 0.486116  |
| 45 | 1 | 0 | -5.330843 | -1.005332 | 2.261275  |
| 46 | 1 | 0 | 2.984146  | 1.739308  | 3.143355  |

Zero-point Energy: B3LYP/6-311++G(d,p) = -943.056658 (a.u.) Zero-point Correction = 0.396823 (a.u.)

SCF Energy: B3LYP (PCM, 1,4-dioxane)/6-311++G(d,p) = -943.473080 (a.u.)

B3LYP (PCM, H<sub>2</sub>O)/6-311++G(d,p) = -943.505107 (a.u.)

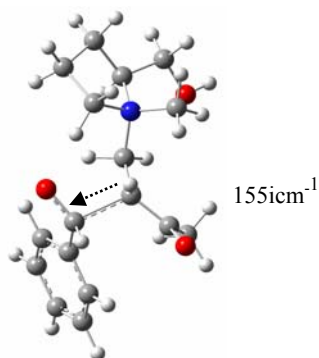

*si-anti-CH<sub>3</sub>-TS3:*

Standard orientation:

| Center<br>Number | Atomic<br>Number | Atomic<br>Type | Coordinates (Angstroms) |           |           |
|------------------|------------------|----------------|-------------------------|-----------|-----------|
|                  |                  |                | X                       | Y         | Z         |
| 1                | 1                | 0              | -1.086361               | -1.448511 | 0.641366  |
| 2                | 6                | 0              | -1.466218               | -1.332426 | -0.373602 |
| 3                | 6                | 0              | -2.773999               | -2.099776 | -0.585772 |
| 4                | 7                | 0              | -1.842979               | 0.134288  | -0.526758 |
| 5                | 1                | 0              | -0.658634               | -1.527519 | -1.086238 |
| 6                | 6                | 0              | -3.914464               | -1.096426 | -0.258324 |
| 7                | 1                | 0              | -2.805399               | -2.978020 | 0.060122  |
| 8                | 1                | 0              | -2.852202               | -2.459146 | -1.612886 |
| 9                | 6                | 0              | -3.217522               | 0.212675  | 0.158640  |
| 10               | 6                | 0              | -2.011503               | 0.456282  | -1.992412 |
| 11               | 1                | 0              | -4.556529               | -1.435707 | 0.553533  |
| 12               | 1                | 0              | -4.560664               | -0.938636 | -1.122634 |
| 13               | 6                | 0              | -3.141412               | 0.340224  | 1.695178  |
| 14               | 1                | 0              | -3.714409               | 1.101510  | -0.237381 |
| 15               | 1                | 0              | -2.850085               | -0.113920 | -2.385305 |
| 16               | 1                | 0              | -2.214436               | 1.522214  | -2.089956 |
| 17               | 1                | 0              | -1.082936               | 0.172380  | -2.495229 |
| 18               | 8                | 0              | -4.457657               | 0.341423  | 2.236043  |
| 19               | 1                | 0              | -2.637609               | -0.524713 | 2.131483  |
| 20               | 1                | 0              | -2.599802               | 1.237223  | 2.001027  |
| 21               | 1                | 0              | -4.823824               | 1.230220  | 2.188328  |
| 22               | 6                | 0              | -0.819514               | 1.097889  | 0.100214  |
| 23               | 6                | 0              | 0.404398                | 1.458119  | -0.720632 |
| 24               | 1                | 0              | -1.414963               | 1.995929  | 0.310491  |
| 25               | 1                | 0              | -0.546452               | 0.649424  | 1.055224  |
| 26               | 6                | 0              | 1.350323                | 2.339939  | -0.030194 |
| 27               | 8                | 0              | 2.089366                | 3.094375  | -0.661882 |
| 28               | 6                | 0              | 1.477457                | 2.271697  | 1.489830  |
| 29               | 1                | 0              | 1.553060                | 1.241281  | 1.847970  |
| 30               | 1                | 0              | 0.605356                | 2.734679  | 1.968437  |
| 31               | 1                | 0              | 2.366586                | 2.823081  | 1.793402  |
| 32               | 1                | 0              | 0.139540                | 1.910620  | -1.673187 |
| 33               | 6                | 0              | 1.494904                | 0.006811  | -1.558376 |
| 34               | 8                | 0              | 0.715999                | -0.765430 | -2.220276 |
| 35               | 1                | 0              | 2.058350                | 0.777580  | -2.110323 |
| 36               | 6                | 0              | 2.368074                | -0.603250 | -0.472536 |
| 37               | 6                | 0              | 3.534278                | 0.045623  | -0.043845 |
| 38               | 6                | 0              | 2.083532                | -1.868392 | 0.052825  |

|    |   |   |          |           |           |
|----|---|---|----------|-----------|-----------|
| 39 | 6 | 0 | 4.363592 | -0.532500 | 0.914847  |
| 40 | 1 | 0 | 3.793267 | 1.008539  | -0.470242 |
| 41 | 6 | 0 | 2.908408 | -2.448427 | 1.015696  |
| 42 | 1 | 0 | 1.234034 | -2.414295 | -0.338086 |
| 43 | 6 | 0 | 4.049292 | -1.778975 | 1.457091  |
| 44 | 1 | 0 | 5.263610 | -0.015192 | 1.230114  |
| 45 | 1 | 0 | 2.673949 | -3.433689 | 1.406022  |
| 46 | 1 | 0 | 4.697991 | -2.232826 | 2.198412  |

Zero-point Energy: B3LYP/6-311++G(d,p) = -943.042906 (a.u.) Zero-point Correction = 0.396758 (a.u.)

SCF Energy: B3LYP (PCM, 1,4-dioxane)/6-311++G(d,p) = -943.457272 (a.u.)

B3LYP (PCM, H<sub>2</sub>O)/6-311++G(d,p) = -943.487352 (a.u.)

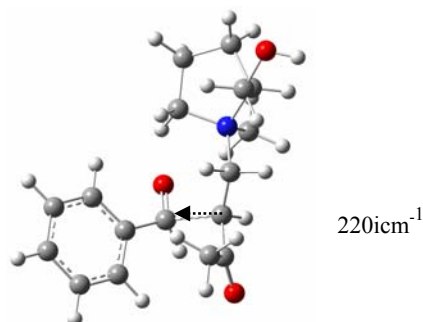

***re-anti-CH<sub>3</sub>-TS4:***

Standard orientation:

| Center Number | Atomic Number | Atomic Type | Coordinates (Angstroms) |           |           |
|---------------|---------------|-------------|-------------------------|-----------|-----------|
|               |               |             | X                       | Y         | Z         |
| 1             | 1             | 0           | 3.256886                | -0.227235 | -1.753415 |
| 2             | 6             | 0           | 2.719380                | -1.126818 | -1.456426 |
| 3             | 6             | 0           | 3.598288                | -2.075869 | -0.624813 |
| 4             | 7             | 0           | 1.592691                | -0.690462 | -0.539938 |
| 5             | 1             | 0           | 2.280132                | -1.570495 | -2.348077 |
| 6             | 6             | 0           | 3.187291                | -1.842469 | 0.854496  |
| 7             | 1             | 0           | 4.651886                | -1.850489 | -0.793079 |
| 8             | 1             | 0           | 3.445704                | -3.115966 | -0.915036 |
| 9             | 6             | 0           | 2.250892                | -0.624052 | 0.843019  |
| 10            | 6             | 0           | 0.984343                | 0.616022  | -1.051138 |
| 11            | 6             | 0           | 0.523446                | -1.760350 | -0.544322 |
| 12            | 1             | 0           | 4.037336                | -1.643553 | 1.505817  |
| 13            | 1             | 0           | 2.675162                | -2.717581 | 1.256578  |
| 14            | 6             | 0           | 3.006595                | 0.695175  | 1.091828  |
| 15            | 1             | 0           | 1.453923                | -0.702672 | 1.581506  |
| 16            | 6             | 0           | -0.164025               | 1.121834  | -0.217121 |
| 17            | 1             | 0           | 1.814318                | 1.315969  | -1.149435 |

|    |   |   |           |           |           |
|----|---|---|-----------|-----------|-----------|
| 18 | 1 | 0 | 0.583272  | 0.364523  | -2.050219 |
| 19 | 1 | 0 | 0.992443  | -2.737213 | -0.447055 |
| 20 | 1 | 0 | -0.157265 | -1.588457 | 0.285042  |
| 21 | 1 | 0 | -0.037486 | -1.658971 | -1.474979 |
| 22 | 8 | 0 | 3.629196  | 0.639523  | 2.370098  |
| 23 | 1 | 0 | 3.810516  | 0.832328  | 0.363136  |
| 24 | 1 | 0 | 2.328823  | 1.547226  | 1.024653  |
| 25 | 6 | 0 | -0.239575 | 2.574320  | -0.007017 |
| 26 | 8 | 0 | -0.700044 | 3.065444  | 1.021148  |
| 27 | 6 | 0 | 0.182824  | 3.483782  | -1.156689 |
| 28 | 1 | 0 | 1.266788  | 3.648307  | -1.129383 |
| 29 | 1 | 0 | -0.302905 | 4.452370  | -1.041082 |
| 30 | 1 | 0 | -0.065562 | 3.054115  | -2.131107 |
| 31 | 1 | 0 | -0.309558 | 0.604540  | 0.727160  |
| 32 | 1 | 0 | 3.029433  | 1.001363  | 3.030295  |
| 33 | 6 | 0 | -1.702709 | 0.650085  | -1.284038 |
| 34 | 8 | 0 | -1.293117 | 0.047327  | -2.345347 |
| 35 | 6 | 0 | -2.591522 | -0.125731 | -0.312804 |
| 36 | 6 | 0 | -3.062896 | 0.441479  | 0.879597  |
| 37 | 6 | 0 | -3.001149 | -1.419771 | -0.646322 |
| 38 | 6 | 0 | -3.901988 | -0.280151 | 1.725531  |
| 39 | 1 | 0 | -2.763155 | 1.448930  | 1.149658  |
| 40 | 6 | 0 | -3.842430 | -2.144032 | 0.200027  |
| 41 | 1 | 0 | -2.667031 | -1.830133 | -1.592623 |
| 42 | 6 | 0 | -4.292835 | -1.578957 | 1.391691  |
| 43 | 1 | 0 | -4.256901 | 0.173007  | 2.645425  |
| 44 | 1 | 0 | -4.158926 | -3.144183 | -0.079030 |
| 45 | 1 | 0 | -4.951655 | -2.137021 | 2.048333  |
| 46 | 1 | 0 | -2.116878 | 1.669199  | -1.413706 |

Zero-point Energy: B3LYP/6-311++G(d,p) = -943.051831 (a.u.) Zero-point Correction = 0.396177 (a.u.)

SCF Energy: B3LYP (PCM, 1,4-dioxane)/6-311++G(d,p) = -943.465990 (a.u.)

B3LYP (PCM, H<sub>2</sub>O)/6-311++G(d,p) = -943.497296 (a.u.)

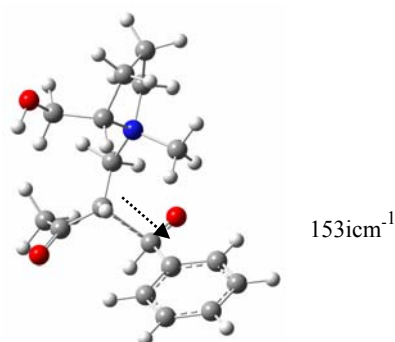

**IM-OH-TS2:**

Standard orientation:

| Center<br>Number | Atomic<br>Number | Atomic<br>Type | Coordinates (Angstroms) |           |           |
|------------------|------------------|----------------|-------------------------|-----------|-----------|
|                  |                  |                | X                       | Y         | Z         |
| 1                | 1                | 0              | 2.655702                | 0.556537  | -2.661742 |
| 2                | 6                | 0              | 3.888134                | -0.994018 | -1.660470 |
| 3                | 6                | 0              | 2.581781                | -0.287143 | -1.975238 |
| 4                | 6                | 0              | 3.567765                | -1.742934 | -0.355996 |
| 5                | 1                | 0              | 4.701024                | -0.277373 | -1.520434 |
| 6                | 1                | 0              | 4.181426                | -1.659625 | -2.473779 |
| 7                | 6                | 0              | 2.473851                | -0.925774 | 0.366995  |
| 8                | 7                | 0              | 2.052356                | 0.210372  | -0.640283 |
| 9                | 1                | 0              | 1.846069                | -0.993840 | -2.363058 |
| 10               | 1                | 0              | 4.452135                | -1.853199 | 0.275189  |
| 11               | 1                | 0              | 3.199674                | -2.747669 | -0.574284 |
| 12               | 6                | 0              | 2.919521                | -0.422239 | 1.748168  |
| 13               | 6                | 0              | 2.687652                | 1.535886  | -0.327830 |
| 14               | 8                | 0              | 1.972460                | 0.344421  | 2.409890  |
| 15               | 1                | 0              | 3.175809                | -1.345837 | 2.297707  |
| 16               | 1                | 0              | 3.858582                | 0.144211  | 1.661035  |
| 17               | 1                | 0              | 2.291696                | 2.276109  | -1.022838 |
| 18               | 1                | 0              | 2.454723                | 1.809299  | 0.697229  |
| 19               | 1                | 0              | 1.037162                | -0.129686 | 2.264648  |
| 20               | 1                | 0              | 3.765350                | 1.453490  | -0.452541 |
| 21               | 1                | 0              | 1.549774                | -1.482884 | 0.515748  |
| 22               | 6                | 0              | -1.031935               | 0.114478  | 1.268575  |
| 23               | 8                | 0              | -0.135443               | -0.787122 | 1.728285  |
| 24               | 6                | 0              | -0.231697               | 1.151297  | 0.281094  |
| 25               | 6                | 0              | -1.108810               | 2.271203  | -0.243039 |
| 26               | 8                | 0              | -1.382506               | 3.209236  | 0.483055  |
| 27               | 6                | 0              | -1.691133               | 2.202756  | -1.648795 |
| 28               | 1                | 0              | -1.970460               | 1.186544  | -1.934900 |
| 29               | 1                | 0              | -0.956359               | 2.574067  | -2.373433 |
| 30               | 1                | 0              | -2.564399               | 2.852198  | -1.698784 |
| 31               | 6                | 0              | 0.522626                | 0.362215  | -0.792649 |
| 32               | 1                | 0              | 0.411349                | 0.828986  | -1.772143 |
| 33               | 1                | 0              | 0.148602                | -0.659654 | -0.857069 |
| 34               | 6                | 0              | -2.231044               | -0.531282 | 0.568084  |
| 35               | 1                | 0              | 0.453636                | 1.614755  | 0.987479  |
| 36               | 6                | 0              | -3.446450               | 0.149645  | 0.421309  |
| 37               | 6                | 0              | -2.145967               | -1.845407 | 0.099171  |
| 38               | 6                | 0              | -4.532517               | -0.451614 | -0.211901 |
| 39               | 6                | 0              | -4.424709               | -1.752611 | -0.705262 |

|    |   |   |           |           |           |
|----|---|---|-----------|-----------|-----------|
| 40 | 6 | 0 | -3.228880 | -2.449520 | -0.540935 |
| 41 | 1 | 0 | -1.232630 | -2.395349 | 0.294170  |
| 42 | 1 | 0 | -3.146650 | -3.473172 | -0.892205 |
| 43 | 1 | 0 | -5.271810 | -2.224385 | -1.191306 |
| 44 | 1 | 0 | -5.468198 | 0.089251  | -0.307733 |
| 45 | 1 | 0 | -3.549424 | 1.153628  | 0.821817  |
| 46 | 1 | 0 | -1.434493 | 0.789101  | 2.045681  |

Zero-point Energy: B3LYP/6-311++G(d,p) = -943.071095 (a.u.) Zero-point Correction = 0.397584 (a.u.)

SCF Energy: B3LYP (PCM, 1,4-dioxane)/6-311++G(d,p) = -943.483904 (a.u.)

B3LYP (PCM, H<sub>2</sub>O)/6-311++G(d,p) = -943.511003 (a.u.)

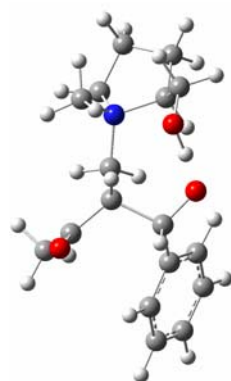

#### TS2-OH-TS2:

Standard orientation:

| Center<br>Number | Atomic<br>Number | Atomic<br>Type | Coordinates (Angstroms) |           |           |
|------------------|------------------|----------------|-------------------------|-----------|-----------|
|                  |                  |                | X                       | Y         | Z         |
| 1                | 1                | 0              | 3.234757                | -0.738492 | -2.008523 |
| 2                | 6                | 0              | 2.240896                | -2.658263 | -1.513012 |
| 3                | 6                | 0              | 2.259584                | -1.162496 | -1.773716 |
| 4                | 6                | 0              | 0.926038                | -2.823117 | -0.745847 |
| 5                | 1                | 0              | 3.096639                | -2.967501 | -0.906380 |
| 6                | 1                | 0              | 2.272093                | -3.225850 | -2.444645 |
| 7                | 6                | 0              | 0.883753                | -1.622089 | 0.216019  |
| 8                | 7                | 0              | 1.730056                | -0.508222 | -0.499435 |
| 9                | 1                | 0              | 1.566177                | -0.912116 | -2.577891 |
| 10               | 1                | 0              | 0.866798                | -3.764141 | -0.196800 |
| 11               | 1                | 0              | 0.079177                | -2.793804 | -1.436387 |
| 12               | 6                | 0              | 1.341030                | -2.030373 | 1.629084  |
| 13               | 6                | 0              | 2.897778                | -0.014394 | 0.303319  |
| 14               | 8                | 0              | 1.373504                | -1.017868 | 2.585327  |
| 15               | 1                | 0              | 0.632716                | -2.829048 | 1.906496  |
| 16               | 1                | 0              | 2.332115                | -2.500922 | 1.597069  |



|    |   |   |           |           |           |
|----|---|---|-----------|-----------|-----------|
| 17 | 1 | 0 | 3.408714  | 0.747374  | -0.283805 |
| 18 | 1 | 0 | 2.553211  | 0.387342  | 1.248482  |
| 19 | 1 | 0 | 0.583853  | -0.411619 | 2.463309  |
| 20 | 1 | 0 | 3.574531  | -0.845679 | 0.494133  |
| 21 | 1 | 0 | -0.115308 | -1.206894 | 0.296401  |
| 22 | 6 | 0 | -1.011140 | 1.293909  | 0.873261  |
| 23 | 8 | 0 | -0.385155 | 0.835575  | 2.077860  |
| 24 | 6 | 0 | 0.282370  | 1.647958  | 0.085904  |
| 25 | 6 | 0 | 0.493319  | 3.089313  | -0.188061 |
| 26 | 8 | 0 | -0.321063 | 3.949465  | 0.118735  |
| 27 | 6 | 0 | 1.812811  | 3.543169  | -0.822630 |
| 28 | 1 | 0 | 1.729733  | 3.533076  | -1.915606 |
| 29 | 1 | 0 | 2.669713  | 2.928862  | -0.538477 |
| 30 | 1 | 0 | 1.993446  | 4.573473  | -0.517546 |
| 31 | 6 | 0 | 0.820686  | 0.705382  | -0.949051 |
| 32 | 1 | 0 | 1.462058  | 1.220748  | -1.664790 |
| 33 | 1 | 0 | 0.024045  | 0.208605  | -1.509457 |
| 34 | 6 | 0 | -2.031731 | 0.352593  | 0.268056  |
| 35 | 1 | 0 | 0.622528  | 1.368775  | 1.336546  |
| 36 | 6 | 0 | -2.582447 | 0.604052  | -0.997479 |
| 37 | 6 | 0 | -2.508909 | -0.743551 | 0.994790  |
| 38 | 6 | 0 | -3.562650 | -0.230940 | -1.530267 |
| 39 | 6 | 0 | -4.020087 | -1.330322 | -0.801749 |
| 40 | 6 | 0 | -3.493962 | -1.578447 | 0.464767  |
| 41 | 1 | 0 | -2.106703 | -0.913327 | 1.986810  |
| 42 | 1 | 0 | -3.859761 | -2.416818 | 1.048559  |
| 43 | 1 | 0 | -4.788586 | -1.975988 | -1.212251 |
| 44 | 1 | 0 | -3.978998 | -0.017534 | -2.509209 |
| 45 | 1 | 0 | -2.256002 | 1.475532  | -1.557526 |
| 46 | 1 | 0 | -1.529660 | 2.241825  | 1.061824  |

Zero-point Energy: B3LYP/6-311++G(d,p) = -943.022870 (a.u.) Zero-point Correction = 0.393426 (a.u.)

SCF Energy: B3LYP (PCM, 1,4-dioxane)/6-311++G(d,p) = -943.431093 (a.u.)

B3LYP (PCM, H<sub>2</sub>O)/6-311++G(d,p) = -943.457248 (a.u.)

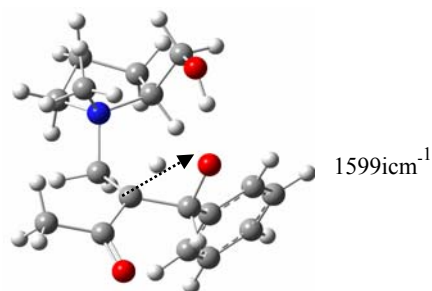

**pro-OH-TS2:**

Standard orientation:

| Center Number | Atomic Number | Atomic Type | Coordinates (Angstroms) |           |           |
|---------------|---------------|-------------|-------------------------|-----------|-----------|
|               |               |             | X                       | Y         | Z         |
| 1             | 6             | 0           | -1.349385               | -0.383008 | -0.167119 |
| 2             | 6             | 0           | -2.797080               | -0.098139 | 0.097537  |
| 3             | 8             | 0           | -3.116579               | 0.929112  | 0.678773  |
| 4             | 6             | 0           | -3.862141               | -1.078179 | -0.352269 |
| 5             | 1             | 0           | -3.685763               | -2.073776 | 0.062456  |
| 6             | 1             | 0           | -3.867266               | -1.169249 | -1.442112 |
| 7             | 1             | 0           | -4.832078               | -0.710810 | -0.021180 |
| 8             | 6             | 0           | -0.973166               | -1.432024 | -0.906475 |
| 9             | 1             | 0           | -1.693794               | -2.114879 | -1.339978 |
| 10            | 1             | 0           | 0.071598                | -1.638322 | -1.103684 |
| 11            | 6             | 0           | -0.374721               | 0.620963  | 0.462017  |
| 12            | 8             | 0           | -0.612763               | 1.928961  | -0.058708 |
| 13            | 1             | 0           | -0.574020               | 0.622796  | 1.542491  |
| 14            | 6             | 0           | 1.084088                | 0.271776  | 0.255894  |
| 15            | 6             | 0           | 1.723319                | -0.607384 | 1.134803  |
| 16            | 6             | 0           | 1.806865                | 0.806029  | -0.813753 |
| 17            | 6             | 0           | 3.143614                | 0.458198  | -1.003713 |
| 18            | 6             | 0           | 3.771811                | -0.428029 | -0.130064 |
| 19            | 6             | 0           | 3.057809                | -0.959762 | 0.942942  |
| 20            | 1             | 0           | 1.175864                | -1.016147 | 1.978716  |
| 21            | 1             | 0           | 3.541612                | -1.639636 | 1.635491  |
| 22            | 1             | 0           | 4.812275                | -0.694982 | -0.277892 |
| 23            | 1             | 0           | 3.696670                | 0.884806  | -1.833358 |
| 24            | 1             | 0           | 1.319979                | 1.506510  | -1.480306 |
| 25            | 1             | 0           | -1.516412               | 2.156470  | 0.200039  |

Zero-point Energy: B3LYP/6-311++G(d,p) = -576.779367 (a.u.) Zero-point Correction = 0.203445 (a.u.)

SCF Energy: B3LYP (PCM, 1,4-dioxane)/6-311++G(d,p) = -576.988319 (a.u.)

B3LYP (PCM, H<sub>2</sub>O)/6-311++G(d,p) = -576.998673 (a.u.)

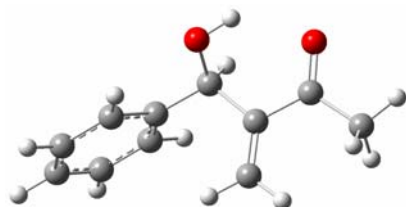

**com-H<sub>2</sub>O-OH-TS2:**

Standard orientation:

| Center<br>Number | Atomic<br>Number | Atomic<br>Type | Coordinates (Angstroms) |           |           |
|------------------|------------------|----------------|-------------------------|-----------|-----------|
|                  |                  |                | X                       | Y         | Z         |
| 1                | 8                | 0              | 1.291575                | -3.177626 | -1.810450 |
| 2                | 1                | 0              | 1.000243                | -4.034186 | -2.131893 |
| 3                | 1                | 0              | 2.176691                | -1.936098 | -0.459641 |
| 4                | 6                | 0              | 4.085736                | -0.867106 | -0.132142 |
| 5                | 6                | 0              | 2.612702                | -1.153958 | 0.163203  |
| 6                | 6                | 0              | 4.272728                | 0.646494  | 0.132734  |
| 7                | 1                | 0              | 4.330535                | -1.122408 | -1.163518 |
| 8                | 1                | 0              | 4.721223                | -1.480997 | 0.506875  |
| 9                | 6                | 0              | 2.885428                | 1.174559  | 0.536239  |
| 10               | 7                | 0              | 1.887895                | 0.166580  | -0.071966 |
| 11               | 1                | 0              | 2.463701                | -1.399409 | 1.216230  |
| 12               | 1                | 0              | 4.636512                | 1.162379  | -0.759459 |
| 13               | 1                | 0              | 4.989790                | 0.846265  | 0.930546  |
| 14               | 6                | 0              | 2.689289                | 2.641133  | 0.160084  |
| 15               | 6                | 0              | 1.699028                | 0.396184  | -1.552141 |
| 16               | 8                | 0              | 1.423815                | 3.186162  | 0.499744  |
| 17               | 1                | 0              | 3.506365                | 3.198644  | 0.635070  |
| 18               | 1                | 0              | 2.802686                | 2.774728  | -0.916466 |
| 19               | 1                | 0              | 0.937722                | -0.327825 | -1.882186 |
| 20               | 1                | 0              | 1.320005                | 1.405647  | -1.696254 |
| 21               | 1                | 0              | 2.653058                | 0.270037  | -2.060652 |
| 22               | 1                | 0              | 2.751920                | 1.059786  | 1.615414  |
| 23               | 1                | 0              | 0.779654                | 0.558207  | 1.656986  |
| 24               | 6                | 0              | 0.525495                | 0.229664  | 0.649761  |
| 25               | 6                | 0              | -0.307323               | -1.064959 | 0.728105  |
| 26               | 1                | 0              | -0.022375               | 1.041304  | 0.173304  |
| 27               | 6                | 0              | -1.069309               | -1.179362 | 2.040053  |
| 28               | 8                | 0              | -1.378154               | -2.278030 | 2.461938  |
| 29               | 6                | 0              | -1.483781               | 0.072042  | 2.803208  |
| 30               | 1                | 0              | -2.335633               | -0.168273 | 3.438606  |
| 31               | 1                | 0              | -1.737978               | 0.902015  | 2.141234  |
| 32               | 1                | 0              | -0.661394               | 0.390385  | 3.455376  |
| 33               | 1                | 0              | 1.410742                | 3.438183  | 1.428238  |
| 34               | 6                | 0              | -1.286226               | -1.315412 | -0.554411 |
| 35               | 6                | 0              | -2.394451               | -0.255481 | -0.626638 |
| 36               | 1                | 0              | -1.778456               | -2.267730 | -0.278598 |
| 37               | 8                | 0              | -0.546348               | -1.393242 | -1.681044 |
| 38               | 1                | 0              | 0.474835                | -2.565111 | -1.810778 |
| 39               | 6                | 0              | -2.289338               | 0.812626  | -1.521921 |
| 40               | 6                | 0              | -3.552869               | -0.353353 | 0.154905  |
| 41               | 6                | 0              | -4.558952               | 0.608108  | 0.071757  |

|    |   |   |           |           |           |
|----|---|---|-----------|-----------|-----------|
| 42 | 6 | 0 | -4.426430 | 1.686951  | -0.802881 |
| 43 | 6 | 0 | -3.289335 | 1.781845  | -1.603978 |
| 44 | 1 | 0 | -5.453269 | 0.507417  | 0.678019  |
| 45 | 1 | 0 | -5.211087 | 2.432446  | -0.874043 |
| 46 | 1 | 0 | -3.190430 | 2.602045  | -2.307818 |
| 47 | 1 | 0 | -1.432747 | 0.837547  | -2.184804 |
| 48 | 1 | 0 | -3.678491 | -1.201895 | 0.820892  |
| 49 | 1 | 0 | 0.329470  | -1.947132 | 0.695961  |

Zero-point Energy: B3LYP/6-311++G(d,p) = -1019.508920 (a.u.)    Zero-point Correction = 0.422308 (a.u.)

SCF Energy: B3LYP (PCM, 1,4-dioxane)/6-311++G(d,p) = -1019.949826 (a.u.)

B3LYP (PCM, H<sub>2</sub>O)/6-311++G(d,p) = -1019.983509 (a.u.)

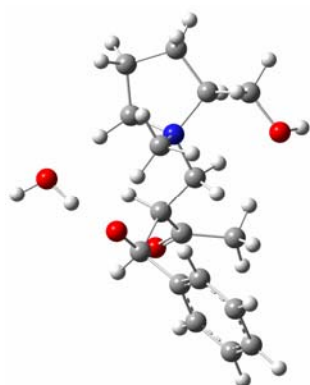

### TS-H<sub>2</sub>O-OH-TS2:

Standard orientation:

| Center Number | Atomic Number | Atomic Type | Coordinates (Angstroms) |           |           |
|---------------|---------------|-------------|-------------------------|-----------|-----------|
|               |               |             | X                       | Y         | Z         |
| 1             | 8             | 0           | 1.326284                | 2.001113  | 2.018295  |
| 2             | 1             | 0           | 1.182971                | 2.822838  | 2.499399  |
| 3             | 1             | 0           | 2.535643                | 0.298275  | -2.902567 |
| 4             | 6             | 0           | 2.935406                | -1.668719 | -1.950687 |
| 5             | 6             | 0           | 2.068182                | -0.465828 | -2.283115 |
| 6             | 6             | 0           | 2.195771                | -2.259445 | -0.746858 |
| 7             | 1             | 0           | 3.952115                | -1.362809 | -1.687081 |
| 8             | 1             | 0           | 3.006150                | -2.355457 | -2.795890 |
| 9             | 6             | 0           | 1.765873                | -1.038068 | 0.081877  |
| 10            | 7             | 0           | 1.692398                | 0.149843  | -0.937258 |
| 11            | 1             | 0           | 1.142140                | -0.788709 | -2.761092 |
| 12            | 1             | 0           | 2.801925                | -2.932786 | -0.140681 |
| 13            | 1             | 0           | 1.321287                | -2.820916 | -1.087222 |
| 14            | 6             | 0           | 2.661048                | -0.803410 | 1.311996  |
| 15            | 6             | 0           | 2.655638                | 1.265709  | -0.637716 |

|    |   |   |           |           |           |
|----|---|---|-----------|-----------|-----------|
| 16 | 8 | 0 | 2.348341  | -1.822235 | 2.255497  |
| 17 | 1 | 0 | 3.719524  | -0.929736 | 1.066326  |
| 18 | 1 | 0 | 2.504027  | 0.186471  | 1.742313  |
| 19 | 1 | 0 | 2.552976  | 2.009979  | -1.427301 |
| 20 | 1 | 0 | 2.424325  | 1.711022  | 0.331691  |
| 21 | 1 | 0 | 3.669969  | 0.868450  | -0.647970 |
| 22 | 1 | 0 | 0.757898  | -1.142340 | 0.467506  |
| 23 | 1 | 0 | 1.497342  | -1.586664 | 2.649934  |
| 24 | 1 | 0 | 0.285152  | 1.333128  | -1.939579 |
| 25 | 6 | 0 | 0.234243  | 0.699863  | -1.054192 |
| 26 | 6 | 0 | -0.387936 | 1.429874  | 0.120727  |
| 27 | 1 | 0 | -0.343823 | -0.189277 | -1.317944 |
| 28 | 6 | 0 | -1.058141 | 2.710084  | -0.242891 |
| 29 | 8 | 0 | -2.037084 | 3.136300  | 0.355920  |
| 30 | 6 | 0 | -0.447855 | 3.590478  | -1.336622 |
| 31 | 1 | 0 | -0.790766 | 4.611345  | -1.172669 |
| 32 | 1 | 0 | -0.801275 | 3.274739  | -2.324647 |
| 33 | 1 | 0 | 0.644302  | 3.572228  | -1.342787 |
| 34 | 6 | 0 | -1.210783 | 0.562881  | 1.124220  |
| 35 | 6 | 0 | -2.089017 | -0.501565 | 0.487747  |
| 36 | 1 | 0 | -1.874508 | 1.270999  | 1.628545  |
| 37 | 8 | 0 | -0.354786 | -0.047242 | 2.102822  |
| 38 | 1 | 0 | 0.260182  | 0.676530  | 2.385483  |
| 39 | 6 | 0 | -1.947668 | -1.859714 | 0.786952  |
| 40 | 6 | 0 | -3.091348 | -0.118874 | -0.416252 |
| 41 | 6 | 0 | -3.910892 | -1.069460 | -1.018156 |
| 42 | 6 | 0 | -3.749310 | -2.425314 | -0.726467 |
| 43 | 6 | 0 | -2.769120 | -2.814344 | 0.181860  |
| 44 | 1 | 0 | -4.686210 | -0.751344 | -1.707000 |
| 45 | 1 | 0 | -4.390997 | -3.165358 | -1.191762 |
| 46 | 1 | 0 | -2.646913 | -3.862730 | 0.433120  |
| 47 | 1 | 0 | -1.208901 | -2.163409 | 1.517019  |
| 48 | 1 | 0 | -3.241085 | 0.933908  | -0.628942 |
| 49 | 1 | 0 | 0.493190  | 1.884329  | 0.959797  |

-----  
Zero-point Energy: B3LYP/6-311++G(d,p) = -1019.502771 (a.u.)    Zero-point Correction = 0.420832 (a.u.)

SCF Energy: B3LYP (PCM, 1,4-dioxane)/6-311++G(d,p) = -1019.935762 (a.u.)

B3LYP (PCM, H<sub>2</sub>O)/6-311++G(d,p) = -1019.958423 (a.u.)

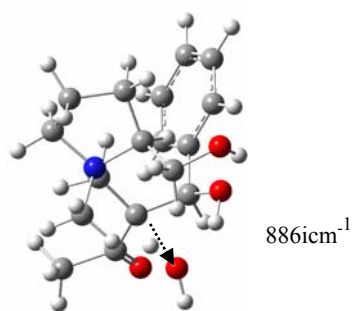

**IM-OH-TS3:**

Standard orientation:

| Center Number | Atomic Number | Atomic Type | Coordinates (Angstroms) |           |           |
|---------------|---------------|-------------|-------------------------|-----------|-----------|
|               |               |             | X                       | Y         | Z         |
| 1             | 1             | 0           | 2.038972                | 1.154183  | 2.384209  |
| 2             | 6             | 0           | 2.766125                | -0.944503 | 2.281241  |
| 3             | 6             | 0           | 2.714187                | 0.507648  | 1.824775  |
| 4             | 6             | 0           | 3.295834                | -1.700658 | 1.040045  |
| 5             | 1             | 0           | 1.771999                | -1.299342 | 2.558712  |
| 6             | 1             | 0           | 3.408564                | -1.057178 | 3.155345  |
| 7             | 6             | 0           | 3.102441                | -0.754860 | -0.165106 |
| 8             | 7             | 0           | 2.265392                | 0.442509  | 0.379779  |
| 9             | 1             | 0           | 3.711624                | 0.951599  | 1.831885  |
| 10            | 1             | 0           | 2.756582                | -2.637351 | 0.886959  |
| 11            | 1             | 0           | 4.352527                | -1.949851 | 1.150590  |
| 12            | 6             | 0           | 2.515362                | -1.434300 | -1.417635 |
| 13            | 8             | 0           | 2.024720                | -0.536980 | -2.359049 |
| 14            | 1             | 0           | 3.340871                | -2.036467 | -1.829652 |
| 15            | 1             | 0           | 1.733975                | -2.142504 | -1.113526 |
| 16            | 1             | 0           | 0.977539                | -0.652793 | -2.335259 |
| 17            | 1             | 0           | 4.050873                | -0.284266 | -0.431940 |
| 18            | 6             | 0           | -1.140559               | 0.033952  | -1.440983 |
| 19            | 8             | 0           | -0.399677               | -0.949413 | -1.966180 |
| 20            | 6             | 0           | -0.113184               | 1.044504  | -0.579263 |
| 21            | 6             | 0           | -0.797986               | 2.232532  | 0.040996  |
| 22            | 8             | 0           | -1.016678               | 3.227084  | -0.631472 |
| 23            | 6             | 0           | -1.259024               | 2.184625  | 1.492179  |
| 24            | 1             | 0           | -0.418810               | 2.420242  | 2.156991  |
| 25            | 1             | 0           | -1.653316               | 1.206069  | 1.773011  |
| 26            | 1             | 0           | -2.025053               | 2.944766  | 1.641492  |
| 27            | 6             | 0           | 0.721502                | 0.168070  | 0.340544  |
| 28            | 1             | 0           | 0.610499                | -0.860859 | 0.002821  |
| 29            | 1             | 0           | 0.391957                | 0.238066  | 1.373787  |

|    |   |   |           |           |           |
|----|---|---|-----------|-----------|-----------|
| 30 | 6 | 0 | -2.296993 | -0.463478 | -0.569845 |
| 31 | 1 | 0 | -1.559635 | 0.744846  | -2.176896 |
| 32 | 6 | 0 | 2.662266  | 1.700344  | -0.338582 |
| 33 | 1 | 0 | 3.718382  | 1.879361  | -0.137658 |
| 34 | 1 | 0 | 2.068682  | 2.535276  | 0.028904  |
| 35 | 1 | 0 | 2.510012  | 1.548657  | -1.403207 |
| 36 | 6 | 0 | -2.252490 | -1.742334 | -0.007520 |
| 37 | 6 | 0 | -3.433183 | 0.323738  | -0.348851 |
| 38 | 6 | 0 | -4.481691 | -0.139147 | 0.444809  |
| 39 | 6 | 0 | -3.296127 | -2.207393 | 0.792624  |
| 40 | 6 | 0 | -4.412522 | -1.405115 | 1.027351  |
| 41 | 1 | 0 | -3.503145 | 1.302876  | -0.813802 |
| 42 | 1 | 0 | -5.358230 | 0.481654  | 0.598105  |
| 43 | 1 | 0 | -3.249240 | -3.205582 | 1.216293  |
| 44 | 1 | 0 | -1.406757 | -2.375421 | -0.249776 |
| 45 | 1 | 0 | -5.230233 | -1.770138 | 1.639342  |
| 46 | 1 | 0 | 0.472962  | 1.419319  | -1.412247 |

Zero-point Energy: B3LYP/6-311++G(d,p) = -943.065517 (a.u.) Zero-point Correction = 0.397590 (a.u.)

SCF Energy: B3LYP (PCM, 1,4-dioxane)/6-311++G(d,p) = -943.478968 (a.u.)

B3LYP (PCM, H<sub>2</sub>O)/6-311++G(d,p) = -943.507280 (a.u.)

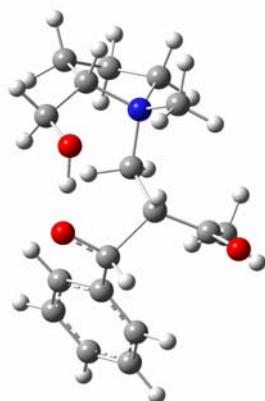

**TS2-OH-TS3:**

Standard orientation:

| Center<br>Number | Atomic<br>Number | Atomic<br>Type | Coordinates (Angstroms) |           |           |
|------------------|------------------|----------------|-------------------------|-----------|-----------|
|                  |                  |                | X                       | Y         | Z         |
| 1                | 1                | 0              | -3.405345               | 0.356654  | -1.371611 |
| 2                | 6                | 0              | -2.623621               | -1.624260 | -2.015682 |
| 3                | 6                | 0              | -3.155552               | -0.629654 | -0.982868 |
| 4                | 6                | 0              | -1.689055               | -2.556201 | -1.203682 |
| 5                | 1                | 0              | -2.073534               | -1.112511 | -2.806842 |
| 6                | 1                | 0              | -3.447356               | -2.159843 | -2.488942 |

|    |   |   |           |           |           |
|----|---|---|-----------|-----------|-----------|
| 7  | 6 | 0 | -1.640293 | -1.982437 | 0.223484  |
| 8  | 7 | 0 | -2.057655 | -0.501484 | 0.052120  |
| 9  | 1 | 0 | -4.030344 | -1.032477 | -0.469473 |
| 10 | 1 | 0 | -0.688482 | -2.585753 | -1.641035 |
| 11 | 1 | 0 | -2.055054 | -3.583305 | -1.174596 |
| 12 | 6 | 0 | -0.322420 | -2.252548 | 0.956954  |
| 13 | 8 | 0 | -0.290066 | -1.791992 | 2.273572  |
| 14 | 1 | 0 | -0.224508 | -3.347274 | 0.956112  |
| 15 | 1 | 0 | 0.519359  | -1.869369 | 0.368511  |
| 16 | 1 | 0 | 0.154637  | -0.882155 | 2.275201  |
| 17 | 1 | 0 | -2.450737 | -2.401769 | 0.825653  |
| 18 | 6 | 0 | -2.625191 | 0.048419  | 1.324820  |
| 19 | 1 | 0 | -3.487780 | -0.561295 | 1.594173  |
| 20 | 1 | 0 | -2.931426 | 1.079394  | 1.165646  |
| 21 | 1 | 0 | -1.883399 | -0.011028 | 2.113216  |
| 22 | 6 | 0 | 1.106993  | 1.206675  | 0.918456  |
| 23 | 8 | 0 | 0.629232  | 0.632112  | 2.148884  |
| 24 | 6 | 0 | -0.271929 | 1.493595  | 0.270402  |
| 25 | 6 | 0 | -0.565209 | 2.892906  | -0.096914 |
| 26 | 8 | 0 | 0.206189  | 3.815941  | 0.131090  |
| 27 | 6 | 0 | -1.910237 | 3.230561  | -0.753713 |
| 28 | 1 | 0 | -2.744782 | 2.618075  | -0.402763 |
| 29 | 1 | 0 | -1.835385 | 3.106404  | -1.840466 |
| 30 | 1 | 0 | -2.130241 | 4.279280  | -0.556309 |
| 31 | 6 | 0 | -0.884624 | 0.411477  | -0.575923 |
| 32 | 1 | 0 | -0.134787 | -0.309196 | -0.892162 |
| 33 | 1 | 0 | -1.355149 | 0.812649  | -1.470556 |
| 34 | 6 | 0 | 2.135218  | 0.385230  | 0.169527  |
| 35 | 1 | 0 | 1.559680  | 2.184541  | 1.120527  |
| 36 | 6 | 0 | 2.854195  | -0.622118 | 0.821614  |
| 37 | 6 | 0 | 2.445262  | 0.668469  | -1.168024 |
| 38 | 6 | 0 | 3.432669  | -0.048212 | -1.841676 |
| 39 | 6 | 0 | 3.846510  | -1.337221 | 0.150257  |
| 40 | 6 | 0 | 4.136220  | -1.058075 | -1.184202 |
| 41 | 1 | 0 | 1.920492  | 1.470235  | -1.678967 |
| 42 | 1 | 0 | 3.659312  | 0.187019  | -2.876300 |
| 43 | 1 | 0 | 4.397703  | -2.111106 | 0.674103  |
| 44 | 1 | 0 | 2.629774  | -0.830284 | 1.860839  |
| 45 | 1 | 0 | 4.908012  | -1.614231 | -1.704911 |
| 46 | 1 | 0 | -0.443539 | 1.219613  | 1.550760  |

-----  
Zero-point Energy: B3LYP/6-311++G(d,p) = -943.021617 (a.u.) Zero-point Correction = 0.393951 (a.u.)

SCF Energy: B3LYP (PCM, 1,4-dioxane)/6-311++G(d,p) = -943.430579 (a.u.)

B3LYP (PCM, H<sub>2</sub>O)/6-311++G(d,p) = -943.457481 (a.u.)



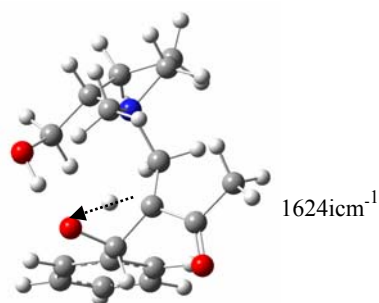

**pro-OH-TS3:**

Standard orientation:

| Center Number | Atomic Number | Atomic Type | Coordinates (Angstroms) |           |           |
|---------------|---------------|-------------|-------------------------|-----------|-----------|
|               |               |             | X                       | Y         | Z         |
| 1             | 6             | 0           | 0.374708                | 0.620806  | 0.462127  |
| 2             | 8             | 0           | 0.612687                | 1.928926  | -0.058420 |
| 3             | 6             | 0           | 1.349426                | -0.382983 | -0.167112 |
| 4             | 6             | 0           | 2.797096                | -0.098166 | 0.097617  |
| 5             | 8             | 0           | 3.116601                | 0.929082  | 0.678875  |
| 6             | 6             | 0           | 3.862199                | -1.078053 | -0.352375 |
| 7             | 1             | 0           | 3.868739                | -1.166951 | -1.442408 |
| 8             | 1             | 0           | 3.684864                | -2.074394 | 0.060095  |
| 9             | 1             | 0           | 4.831905                | -0.711774 | -0.019398 |
| 10            | 6             | 0           | 0.973285                | -1.431761 | -0.906859 |
| 11            | 1             | 0           | -0.071452               | -1.637975 | -1.104299 |
| 12            | 1             | 0           | 1.693959                | -2.114479 | -1.340509 |
| 13            | 6             | 0           | -1.084096               | 0.271624  | 0.255930  |
| 14            | 1             | 0           | 0.573982                | 0.622557  | 1.542604  |
| 15            | 6             | 0           | -1.807008               | 0.806462  | -0.813335 |
| 16            | 6             | 0           | -1.723216               | -0.608045 | 1.134409  |
| 17            | 6             | 0           | -3.057734               | -0.960311 | 0.942529  |
| 18            | 6             | 0           | -3.143782               | 0.458738  | -1.003313 |
| 19            | 6             | 0           | -3.771882               | -0.427960 | -0.130073 |
| 20            | 1             | 0           | -1.175651               | -1.017306 | 1.978013  |
| 21            | 1             | 0           | -3.541415               | -1.640594 | 1.634761  |
| 22            | 1             | 0           | -3.696940               | 0.885812  | -1.832651 |
| 23            | 1             | 0           | -1.320193               | 1.507291  | -1.479567 |
| 24            | 1             | 0           | -4.812370               | -0.694804 | -0.277920 |
| 25            | 1             | 0           | 1.516303                | 2.156451  | 0.200368  |

Zero-point Energy: B3LYP/6-311++G(d,p) = -576.779367 (a.u.) Zero-point Correction = 0.203444 (a.u.)

SCF Energy: B3LYP (PCM, 1,4-dioxane)/6-311++G(d,p) = -576.988304 (a.u.)

B3LYP (PCM, H<sub>2</sub>O)/6-311++G(d,p) = -576.998813 (a.u.)

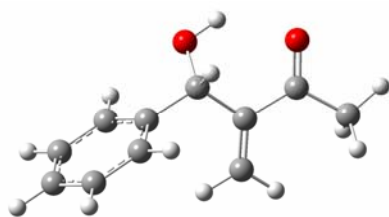

**com-H<sub>2</sub>O-OH-TS3:**

Standard orientation:

| Center Number | Atomic Number | Atomic Type | Coordinates (Angstroms) |           |           |
|---------------|---------------|-------------|-------------------------|-----------|-----------|
|               |               |             | X                       | Y         | Z         |
| 1             | 1             | 0           | -3.319714               | 0.657157  | -1.494365 |
| 2             | 6             | 0           | -2.896912               | -1.430596 | -2.144020 |
| 3             | 6             | 0           | -3.217072               | -0.354349 | -1.103383 |
| 4             | 6             | 0           | -2.031260               | -2.465256 | -1.380785 |
| 5             | 1             | 0           | -2.352689               | -1.013547 | -2.992903 |
| 6             | 1             | 0           | -3.819053               | -1.861302 | -2.535999 |
| 7             | 6             | 0           | -1.879968               | -1.927909 | 0.049730  |
| 8             | 7             | 0           | -2.071855               | -0.390805 | -0.108676 |
| 9             | 1             | 0           | -4.120399               | -0.602437 | -0.544680 |
| 10            | 1             | 0           | -1.053566               | -2.583593 | -1.853701 |
| 11            | 1             | 0           | -2.493946               | -3.452458 | -1.354878 |
| 12            | 6             | 0           | -0.618873               | -2.398413 | 0.784349  |
| 13            | 8             | 0           | -0.527598               | -1.961226 | 2.099031  |
| 14            | 1             | 0           | -0.689954               | -3.495689 | 0.771190  |
| 15            | 1             | 0           | 0.276052                | -2.146406 | 0.198905  |
| 16            | 1             | 0           | -0.042725               | -1.058443 | 2.097634  |
| 17            | 1             | 0           | -2.742931               | -2.217116 | 0.654261  |
| 18            | 6             | 0           | -2.513906               | 0.245318  | 1.182004  |
| 19            | 1             | 0           | -3.330402               | -0.354170 | 1.581203  |
| 20            | 1             | 0           | -2.863103               | 1.256408  | 0.978447  |
| 21            | 1             | 0           | -1.682506               | 0.268602  | 1.878262  |
| 22            | 6             | 0           | 1.059152                | 0.980304  | 0.906077  |
| 23            | 8             | 0           | 0.527887                | 0.364376  | 2.025262  |
| 24            | 6             | 0           | -0.131414               | 1.444233  | -0.012118 |
| 25            | 6             | 0           | 0.128550                | 2.645743  | -0.935265 |
| 26            | 8             | 0           | 1.195265                | 3.213051  | -0.983460 |
| 27            | 6             | 0           | -1.051741               | 3.186222  | -1.741167 |
| 28            | 1             | 0           | -2.015987               | 2.994826  | -1.264427 |
| 29            | 1             | 0           | -1.062365               | 2.728357  | -2.736325 |
| 30            | 1             | 0           | -0.916311               | 4.259262  | -1.875742 |
| 31            | 6             | 0           | -0.823791               | 0.284973  | -0.757312 |

|    |   |   |           |           |           |
|----|---|---|-----------|-----------|-----------|
| 32 | 1 | 0 | -0.095921 | -0.506403 | -0.914882 |
| 33 | 1 | 0 | -1.165090 | 0.605635  | -1.738674 |
| 34 | 6 | 0 | 2.118476  | 0.110495  | 0.198708  |
| 35 | 1 | 0 | 1.574790  | 1.916082  | 1.181647  |
| 36 | 6 | 0 | 2.670273  | -0.967095 | 0.902730  |
| 37 | 6 | 0 | 2.599606  | 0.362226  | -1.094850 |
| 38 | 6 | 0 | 3.575152  | -0.451705 | -1.671720 |
| 39 | 6 | 0 | 3.652734  | -1.775866 | 0.332053  |
| 40 | 6 | 0 | 4.105393  | -1.528120 | -0.962462 |
| 41 | 1 | 0 | 2.242293  | 1.218552  | -1.651151 |
| 42 | 1 | 0 | 3.930483  | -0.233258 | -2.673607 |
| 43 | 1 | 0 | 4.066053  | -2.600609 | 0.903438  |
| 44 | 1 | 0 | 2.314409  | -1.153630 | 1.907753  |
| 45 | 1 | 0 | 4.868272  | -2.156817 | -1.408867 |
| 46 | 1 | 0 | -0.275429 | 1.495686  | 2.892376  |
| 47 | 1 | 0 | -0.829279 | 1.891116  | 0.705756  |
| 48 | 8 | 0 | -0.923631 | 2.199394  | 3.202321  |
| 49 | 1 | 0 | -0.539781 | 2.593847  | 3.989406  |

Zero-point Energy: B3LYP/6-311++G(d,p) = -1019.512491 (a.u.) Zero-point Correction = 0.423309 (a.u.)

SCF Energy: B3LYP (PCM, 1,4-dioxane)/6-311++G(d,p) = -1019.951899 (a.u.)

B3LYP (PCM, H<sub>2</sub>O)/6-311++G(d,p) = -1019.981151 (a.u.)

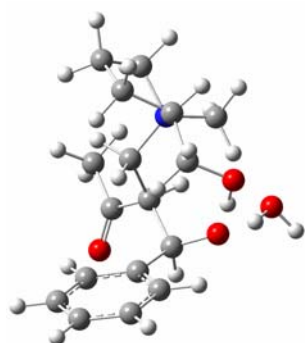

**TS-H<sub>2</sub>O-OH-TS3:**

Standard orientation:

| Center<br>Number | Atomic<br>Number | Atomic<br>Type | Coordinates (Angstroms) |           |           |
|------------------|------------------|----------------|-------------------------|-----------|-----------|
|                  |                  |                | X                       | Y         | Z         |
| 1                | 1                | 0              | -3.198638               | 0.547729  | -1.675639 |
| 2                | 6                | 0              | -2.676577               | -1.556068 | -2.181488 |
| 3                | 6                | 0              | -3.122244               | -0.443608 | -1.231772 |
| 4                | 6                | 0              | -1.930173               | -2.562680 | -1.270024 |
| 5                | 1                | 0              | -2.016070               | -1.170933 | -2.959962 |
| 6                | 1                | 0              | -3.539147               | -1.998760 | -2.680839 |

|    |   |   |           |           |           |
|----|---|---|-----------|-----------|-----------|
| 7  | 6 | 0 | -1.897885 | -1.930244 | 0.133738  |
| 8  | 7 | 0 | -2.091030 | -0.416195 | -0.121749 |
| 9  | 1 | 0 | -4.077711 | -0.688341 | -0.765227 |
| 10 | 1 | 0 | -0.916691 | -2.744463 | -1.635085 |
| 11 | 1 | 0 | -2.431733 | -3.530275 | -1.225621 |
| 12 | 6 | 0 | -0.685619 | -2.355913 | 0.966034  |
| 13 | 8 | 0 | -0.686815 | -1.871825 | 2.279938  |
| 14 | 1 | 0 | -0.741280 | -3.451844 | 0.999582  |
| 15 | 1 | 0 | 0.246035  | -2.111205 | 0.444225  |
| 16 | 1 | 0 | -0.125852 | -1.059716 | 2.307734  |
| 17 | 1 | 0 | -2.797003 | -2.205146 | 0.690686  |
| 18 | 6 | 0 | -2.680381 | 0.272057  | 1.074057  |
| 19 | 1 | 0 | -3.595532 | -0.256758 | 1.340585  |
| 20 | 1 | 0 | -2.895673 | 1.307284  | 0.823881  |
| 21 | 1 | 0 | -1.987796 | 0.261020  | 1.903841  |
| 22 | 6 | 0 | 1.150163  | 1.013703  | 0.901163  |
| 23 | 8 | 0 | 0.738620  | 0.434705  | 2.147405  |
| 24 | 6 | 0 | -0.107830 | 1.415759  | 0.077751  |
| 25 | 6 | 0 | 0.058375  | 2.660692  | -0.730164 |
| 26 | 8 | 0 | 1.012704  | 3.411003  | -0.595555 |
| 27 | 6 | 0 | -1.069161 | 3.077550  | -1.678171 |
| 28 | 1 | 0 | -2.060090 | 2.802785  | -1.307947 |
| 29 | 1 | 0 | -0.930621 | 2.620776  | -2.664672 |
| 30 | 1 | 0 | -1.019691 | 4.158389  | -1.805164 |
| 31 | 6 | 0 | -0.775038 | 0.274807  | -0.678763 |
| 32 | 1 | 0 | -0.072530 | -0.545415 | -0.807308 |
| 33 | 1 | 0 | -1.067981 | 0.594482  | -1.674540 |
| 34 | 6 | 0 | 2.156275  | 0.102638  | 0.215592  |
| 35 | 1 | 0 | 1.666187  | 1.955972  | 1.112463  |
| 36 | 6 | 0 | 2.715010  | -0.992210 | 0.884331  |
| 37 | 6 | 0 | 2.594279  | 0.379270  | -1.087723 |
| 38 | 6 | 0 | 3.543966  | -0.427643 | -1.709918 |
| 39 | 6 | 0 | 3.666784  | -1.801088 | 0.260828  |
| 40 | 6 | 0 | 4.081793  | -1.526912 | -1.039773 |
| 41 | 1 | 0 | 2.212249  | 1.249789  | -1.608196 |
| 42 | 1 | 0 | 3.873806  | -0.190063 | -2.715708 |
| 43 | 1 | 0 | 4.089053  | -2.642444 | 0.799991  |
| 44 | 1 | 0 | 2.410227  | -1.196185 | 1.902503  |
| 45 | 1 | 0 | 4.824317  | -2.152670 | -1.522494 |
| 46 | 1 | 0 | 0.100811  | 1.132003  | 2.527829  |
| 47 | 1 | 0 | -0.741507 | 1.910867  | 1.051376  |
| 48 | 8 | 0 | -1.054262 | 2.226217  | 2.406337  |
| 49 | 1 | 0 | -0.782304 | 3.115043  | 2.656761  |

---

Zero-point Energy: B3LYP/6-311++G(d,p) = -1019.496944 (a.u.) Zero-point Correction = 0.420392 (a.u.)

SCF Energy: B3LYP (PCM, 1,4-dioxane)/6-311++G(d,p) = -1019.931708 (a.u.)

B3LYP (PCM, H<sub>2</sub>O)/6-311++G(d,p) = -1019.957483 (a.u.)

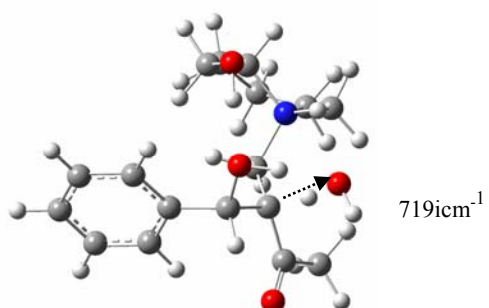

### C. AIM analysis.

The bonding properties of *syn*-TSb1, *anti*-TSc1, *re-syn*-OH-TS1, *si-syn*-OH-TS2, *re-anti*-OH-TS3 and *si-anti*-OH-TS4 have been investigated using the topological methodology AIM, which might be used to assess the chemical bonding situation in a given molecule. The gradient paths of the gradient vector field  $\nabla \rho(r)$ , which originate at a bond critical point and terminate at the nuclei, might be used to define a chemical bond. A bond can be characterized by the positive-negative of  $\nabla^2 \rho(r)$ . If  $\nabla^2 \rho(r) > 0$ , the bond is defined as a closed-shell interaction (ionic bonds, hydrogen bonds, and van der Waals interactions). If  $\nabla^2 \rho(r) < 0$ , the bond is defined as a shared interaction (covalent bond).

Table 2. The bonding properties of *syn*-TSb1, *anti*-TSc1, *re-syn*-OH-TS1, *si-syn*-OH-TS2, *re-anti*-OH-TS3 and *si-anti*-OH-TS4.

|                    |                       |                        |                        |
|--------------------|-----------------------|------------------------|------------------------|
|                    | <i>syn</i> -TSb1      | <i>anti</i> -TSc1      | <i>re-syn</i> -OH-TS1  |
| $L(r)$             | -0.026                | -0.017                 | -0.035                 |
| $\nabla^2 \rho(r)$ | 0.026                 | 0.017                  | 0.035                  |
| Bonding property   | hydrogen-bond         | hydrogen-bond          | hydrogen-bond          |
|                    | <i>si-syn</i> -OH-TS2 | <i>re-anti</i> -OH-TS3 | <i>si-anti</i> -OH-TS4 |
| $L(r)$             | -0.034                | -0.035                 | -0.031                 |
| $\nabla^2 \rho(r)$ | 0.034                 | 0.035                  | 0.031                  |
| Bonding property   | hydrogen-bond         | hydrogen-bond          | hydrogen-bond          |

#### D. The geometry evolution and charge transfer in C–C bond formation.

As proposed by Hammond, the formation of the intermediates involves remarkable structural changes and significant electronic reorganizations.<sup>1</sup> To understand the details of electronic evolution and to check these structural changes along the reaction paths, IRC analysis was carried out for the kinetically favored *syn*-TSb1 transition structure. We constructed PES as a function of the formed N–C and C–C bond by the geometry optimizations starting from the reactants with gradual reducing of the N–C and C–C distances. Fig. 1 presents the evolutions of the relative energies, the N–C1 and C2–C3 bond distances, the electronic populations and the total charge on N atom as the reaction proceeds along the intrinsic reaction coordinate.

The following features are observed during the evolution of the species along the reaction coordinate. The highest energy point on the potential energy curve represents the structure of the transition state *syn*-TSb1. From *syn*-TSb1 to *syn*-IMb2, the bond distance of C2–C3 shortens from 2.346 Å to 1.602 Å; namely, the interaction between two atoms is gradually strengthened and then leads to the formation of *syn*-IMb2 on PES. From *syn*-TSb1 to the reaction entrance, the C2–C3 distance elongates and the bond strength becomes weakened, which is followed by the elongation of N–C1 bond along the reaction coordinate. Finally, the structure is stabilized in the separated formaldehyde and enamine intermediate *syn*-IM1.

Along the structural evolution, a considerable amount of charge is reorganized among N, C1 and C2 atoms. NBO analysis illustrates that, accompanied by the cleavage of N–C1 bond, the electronic populations on 2p orbital of N atom increase and reach the maximum point of 4.24 at IRC=150 bohr<sup>1/2</sup>, which are very close to those in the free catalyst N-methylprolinol (4.27). From the total charge distribution of N atom, it is found that the charge accumulates gradually during the cleavage of the N–C1 bond and stabilizes at  $-0.553e$  finally. In the reverse direction, the populations on N atom decrease gradually and stabilize at 4.08 in *syn*-IMb2 and the charge on N atom decreases gradually along the bond formation path and stabilizes at  $-0.374e$ , which indicates that the charge transfers from N atom toward MVK during the formation of *syn*-TSb1. Meanwhile, the charge accumulated on C2 atom stabilizes at  $-0.536e$  finally. Combining with the curve of the populations on N atom, we conclude that the charge transfers from N-2p orbital to C2 atom.

The electrophilicity index  $\omega$  is powerful tool for correctly explaining the electronic motion. Table 3 shows the electronic chemical potential  $\mu$ , chemical hardness  $\eta$  and electrophilicity index  $\omega$  of *syn*-IM1, *syn*-TSb1 and *syn*-IMb2. According to electrophilicity index  $\omega$ , it is clear that from *syn*-IM1 to *syn*-TSb1, the electrophilicity of alkene moiety becomes stronger, suggesting that the charge transfers from N-2p orbital to MVK. On the other hand, the index  $\omega$  indicates that from *syn*-TSb1 to *syn*-IMb2, the electrophilicity decreases, suggesting that *syn*-TSb1 is more reactive with higher electrophilicity index. The trend of the

variation of electrophilicity index is in agreement with the pronounced charge transfer character in NBO analysis.

Consequently, after the *syn*-enamine attacks formaldehyde, the charge transfers from N atom of N-methylprolinol to MVK. The increasing charge on MVK makes the interaction between MVK and N-methylprolinol greater and the structure of *syn*-TSb1 becomes more compact, as compared to the structure in *syn*-enamine. On the other hand, the charge accumulated on C2 atom makes MVK more nucleophilic and then enhances the interaction between MVK and formaldehyde.

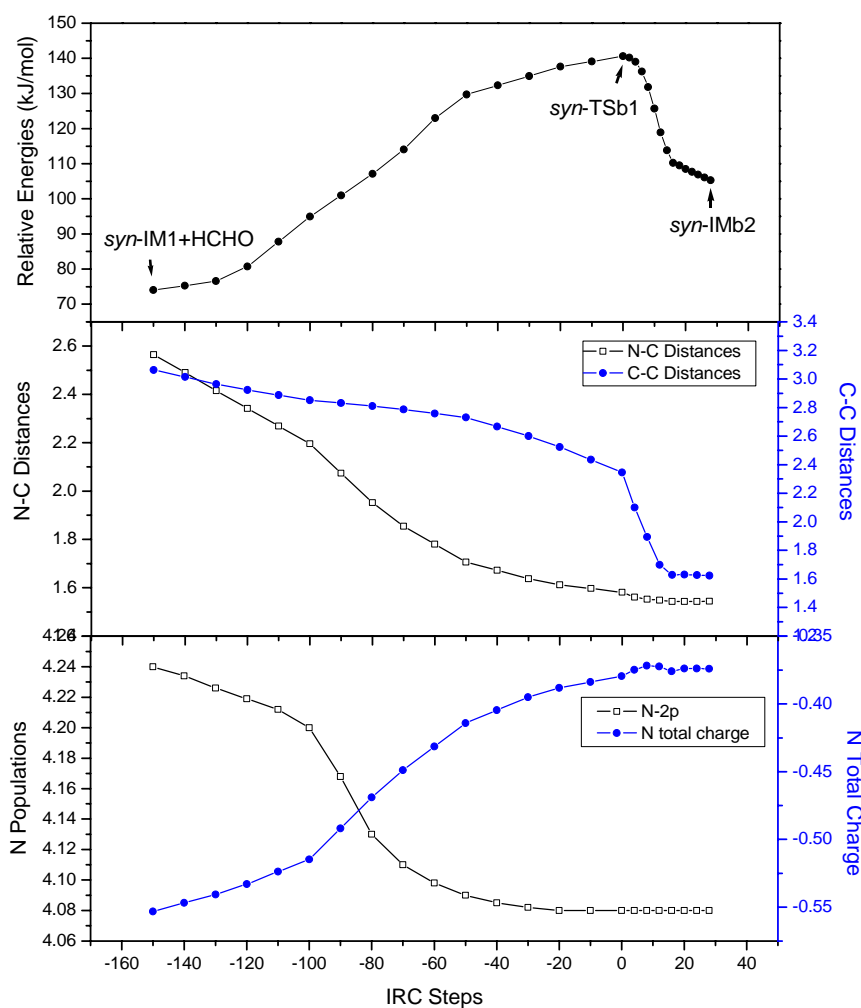

Fig. 1 The variations of the computed potential energies, the bond distances, the electronic populations and the distribution of the total charge on N atom along the intrinsic reaction coordinate.

Table 3 Electronic chemical potential  $\mu$ , chemical hardness  $\eta$  and electrophilicity index  $\omega$  calculated in the process of the attack of enamine to formaldehyde.



|                  | Chemical Potential<br>$\mu$ (a.u.) | Chemical Hardness<br>$\eta$ (a.u.) | Electrophilicity Index<br>$\omega$ (eV) |
|------------------|------------------------------------|------------------------------------|-----------------------------------------|
| <i>syn</i> -IM1  | -0.15                              | 0.17                               | 1.14                                    |
| <i>syn</i> -TSb1 | -0.11                              | 0.14                               | 1.18                                    |
| <i>syn</i> -IMb2 | -0.12                              | 0.16                               | 1.08                                    |

E. The energy profiles along different paths in the presence of water.

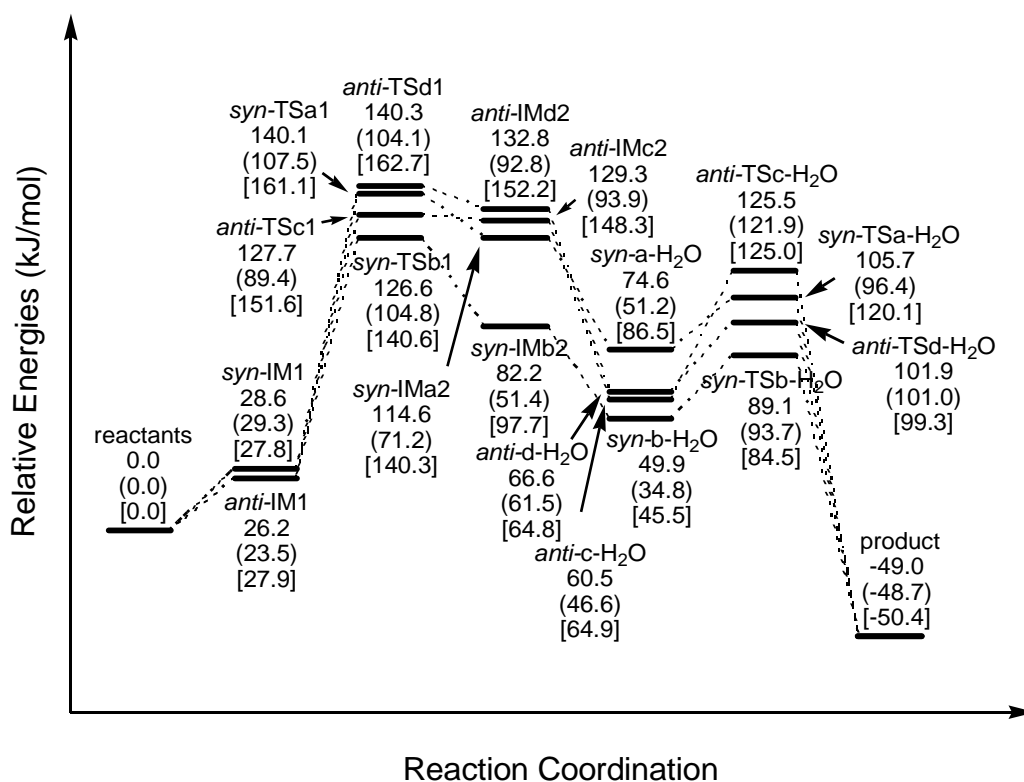

Fig. 2 PCM energies (in kJ/mol) in 1,4-dioxane for various intermediates and transition states calculated at the B3LYP/6-311++G(d,p) level. PCM energies (in kJ/mol) in water are listed in parentheses. The relative energies (in kJ/mol) in the gas-phase are listed in square brackets.

F. The complete paths via *si-syn*-OH-TS2, *re-anti*-OH-TS3.

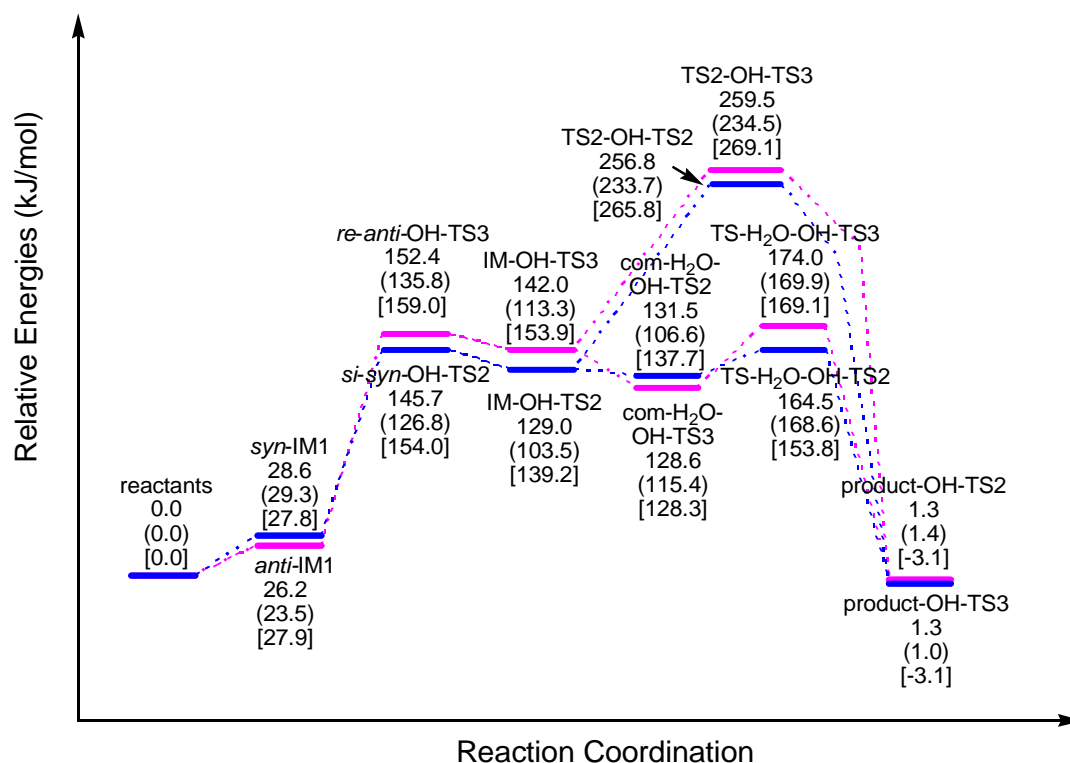

Fig. 3 The complete paths via *si-syn*-OH-TS2, *re-anti*-OH-TS3 concerning the direct proton transfer mechanism and a water-assisted proton transfer mechanism. PCM energies (in kJ/mol) in 1,4-dioxane for various intermediates and transition states calculated at the B3LYP/6-311++G(d,p) level. PCM energies (in kJ/mol) in water are listed in parentheses. The relative energies (in kJ/mol) in the gas-phase are listed in square brackets. (The blue curve represents the path via *si-syn*-OH-TS2, the red one represents the path via *re-anti*-OH-TS3.)
